# Supplementary material for: Synthesis of novel diosgenyl saponin analogues and apoptosis-inducing activity on A549 human lung adenocarcinoma
Source: Royal Society of Chemistry journal article supplement (doi:10.1039/c2ob26579f), 2012-01-01
Supplement: c2ob26579f.pdf [file c2ob26579f.pdf]

**Electronic Supplementary Information**

**Synthesis of novel diosgenyl saponin analogues and  
apoptosis-inducing activity on A549 human lung  
adenocarcinoma**

**Bo Wang,<sup>a</sup> Jaemoo Chun,<sup>b</sup> Yang Liu,<sup>a</sup> Lina Han,<sup>b</sup> Yan-shi Wang,<sup>a</sup> Eun-Ji Joo,<sup>b</sup>  
Yeong-Shik Kim<sup>\*b</sup> and Mao-sheng Cheng<sup>\*a</sup>**

<sup>a</sup> Key Laboratory of Structure-Based Drugs Design & Discovery of Ministry of Education, School of Pharmaceutical Engineering, Shenyang Pharmaceutical University, Shenyang 110016, P. R. China. Fax: +86 24 23995043; Tel: +86 24 23986413; E-mail: mscheng@syphy.edu.cn

<sup>b</sup> Natural Products Research Institute, College of Pharmacy, Seoul National University, Seoul 151-742, Republic of Korea.

1H NMR of Compound 1

AV-600-1H

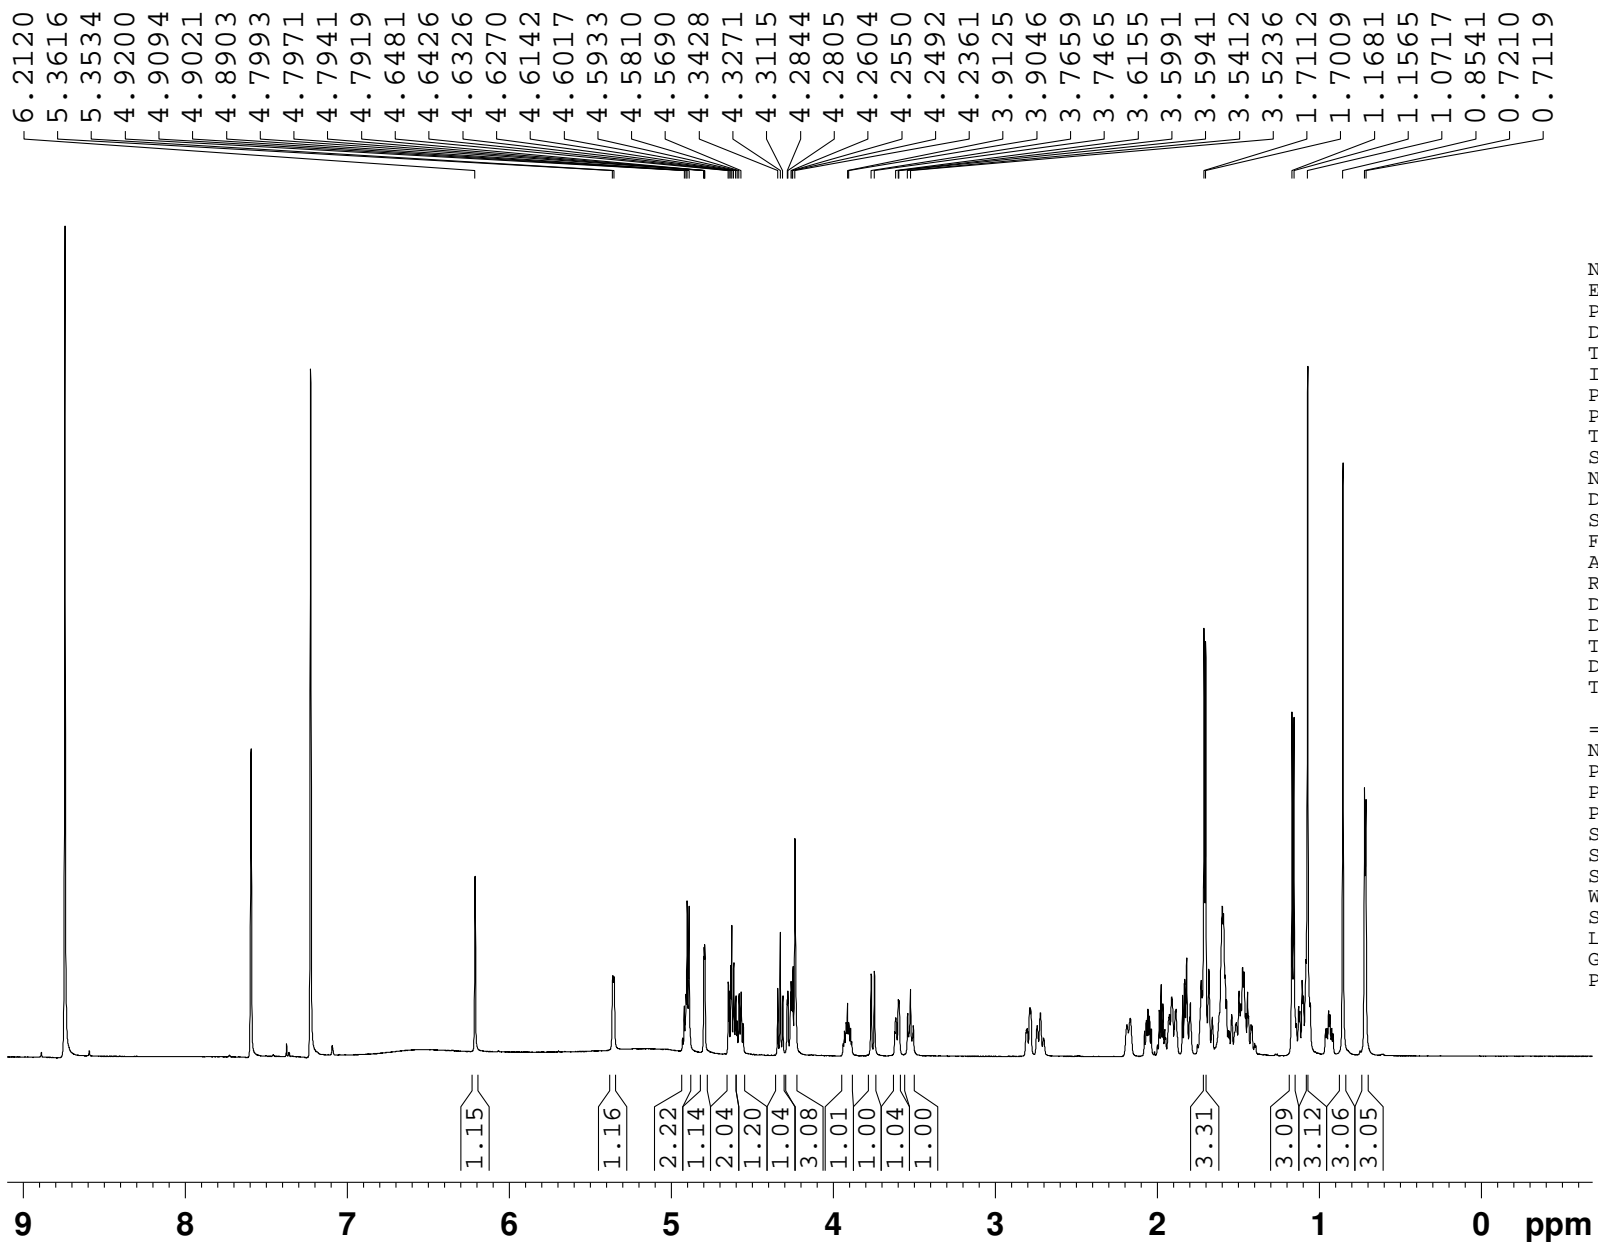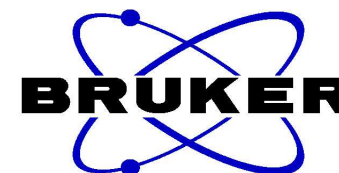

NAME ZP20110328B  
EXPNO 1  
PROCNO 1  
Date\_ 20110328  
Time 15.02  
INSTRUM spect  
PROBHD 5 mm PABBO BB-  
PULPROG zg30  
TD 65536  
SOLVENT Pyr  
NS 8  
DS 2  
SWH 12019.230 Hz  
FIDRES 0.183399 Hz  
AQ 2.7263892 sec  
RG 128  
DW 41.600 usec  
DE 6.50 usec  
TE 298.2 K  
D1 1.00000000 sec  
TD0 1

===== CHANNEL f1 =====  
NUC1 1H  
P1 11.10 usec  
PL1 -4.00 dB  
PL1W 34.70265579 W  
SF01 600.1324005 MHz  
SI 32768  
SF 600.1306576 MHz  
WDW EM  
SSB 0  
LB 0.30 Hz  
GB 0  
PC 1.00

<sup>13</sup>C NMR of Compound 1

AV-600-13C

Sample:

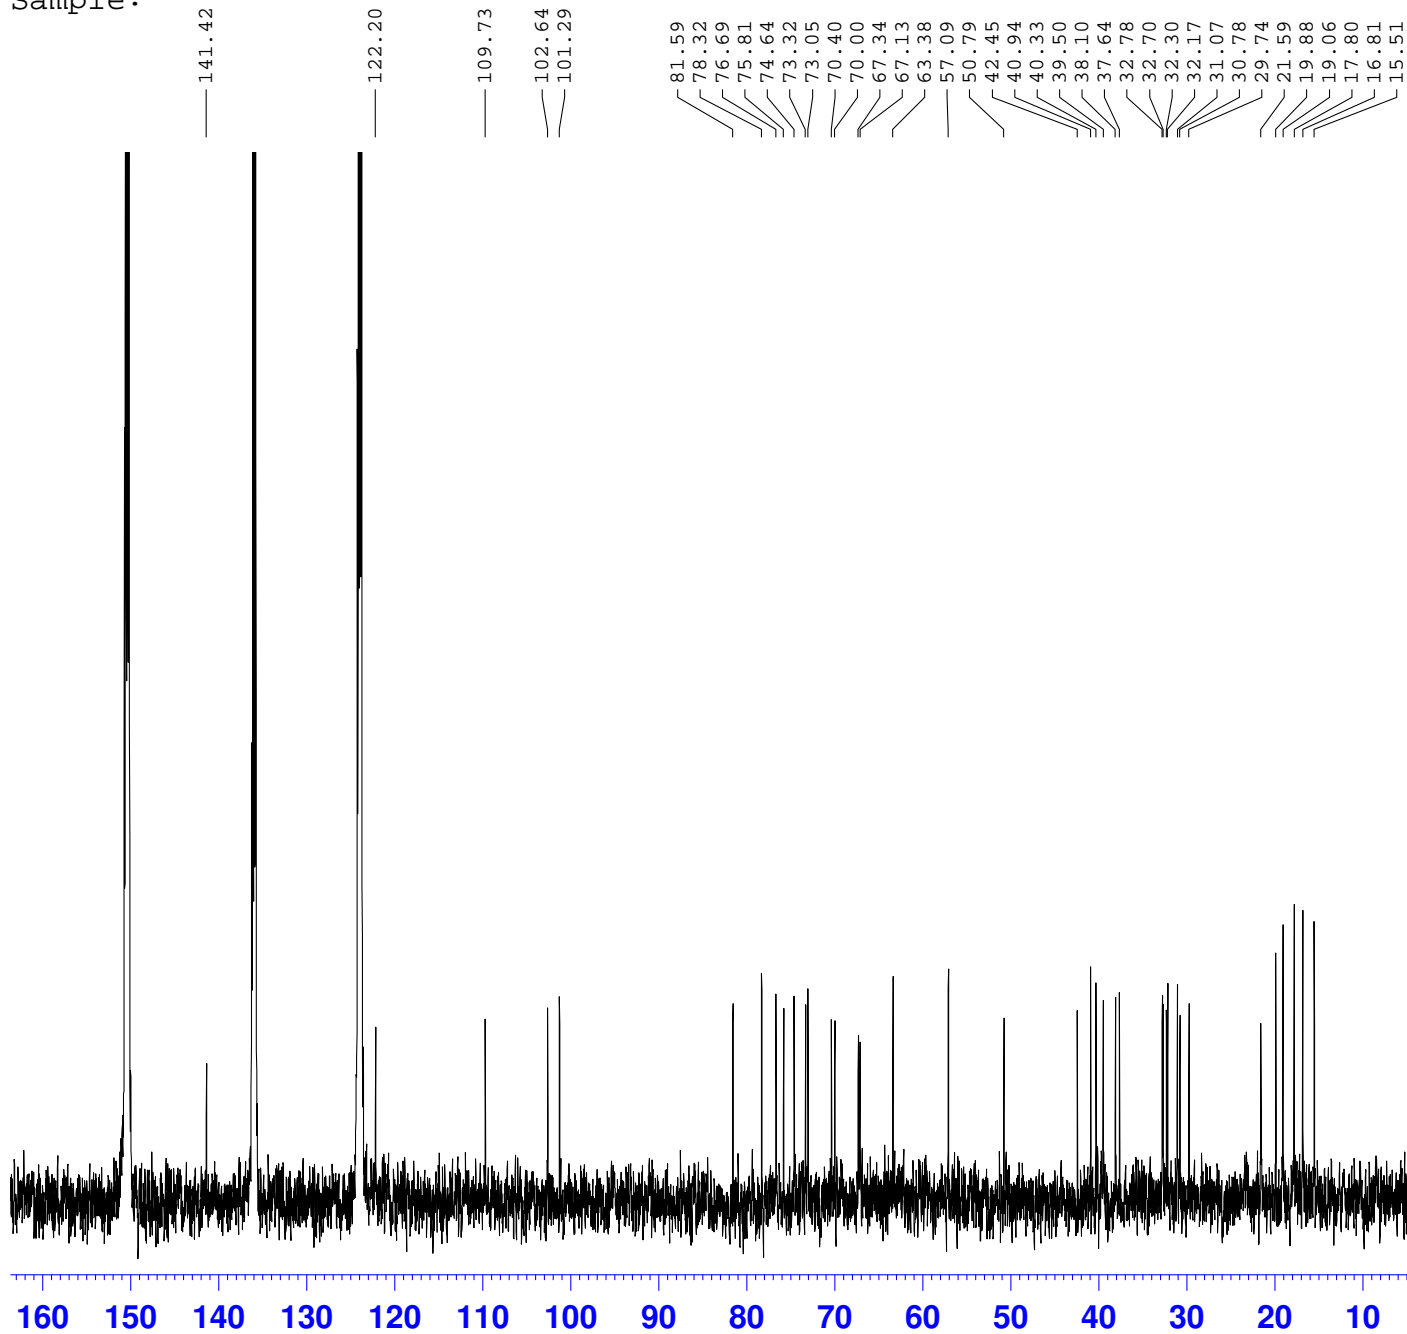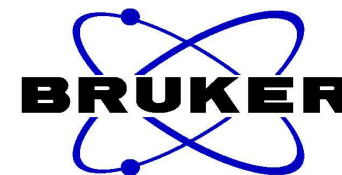

NAME ZP20110328B  
EXPNO 2  
PROCNO 1  
Date\_ 20110331  
Time 19.23  
INSTRUM spect  
PROBHD 5 mm PABBO BB-  
PULPROG zgpg30  
TD 65536  
SOLVENT Pyr  
NS 78  
DS 2  
SWH 45454.547 Hz  
FIDRES 0.693581 Hz  
AQ 0.7209570 sec  
RG 9200  
DW 11.000 usec  
DE 6.50 usec  
TE 298.2 K  
D1 2.00000000 sec  
D11 0.03000000 sec  
TD0 1

==== CHANNEL f1 =====  
NUC1 13C  
P1 8.80 usec  
PL1 1.00 dB  
PL1W 83.20243835 W  
SFO1 150.9178993 MHz

==== CHANNEL f2 =====  
CPDPRG2 waltz16  
NUC2 1H  
PCPD2 80.00 usec  
PL2 -4.00 dB  
PL12 13.16 dB  
PL13 16.00 dB  
PL2W 34.70265579 W  
PL12W 0.66736388 W  
PL13W 0.34702653 W  
SFO2 600.1324005 MHz  
SI 32768  
SF 150.9027005 MHz  
WDW EM  
SSB 0  
LB 3.00 Hz  
GB 0  
PC 1.40

<sup>1</sup>H NMR of Compound 2

AV-600-1H COMPOUND 2

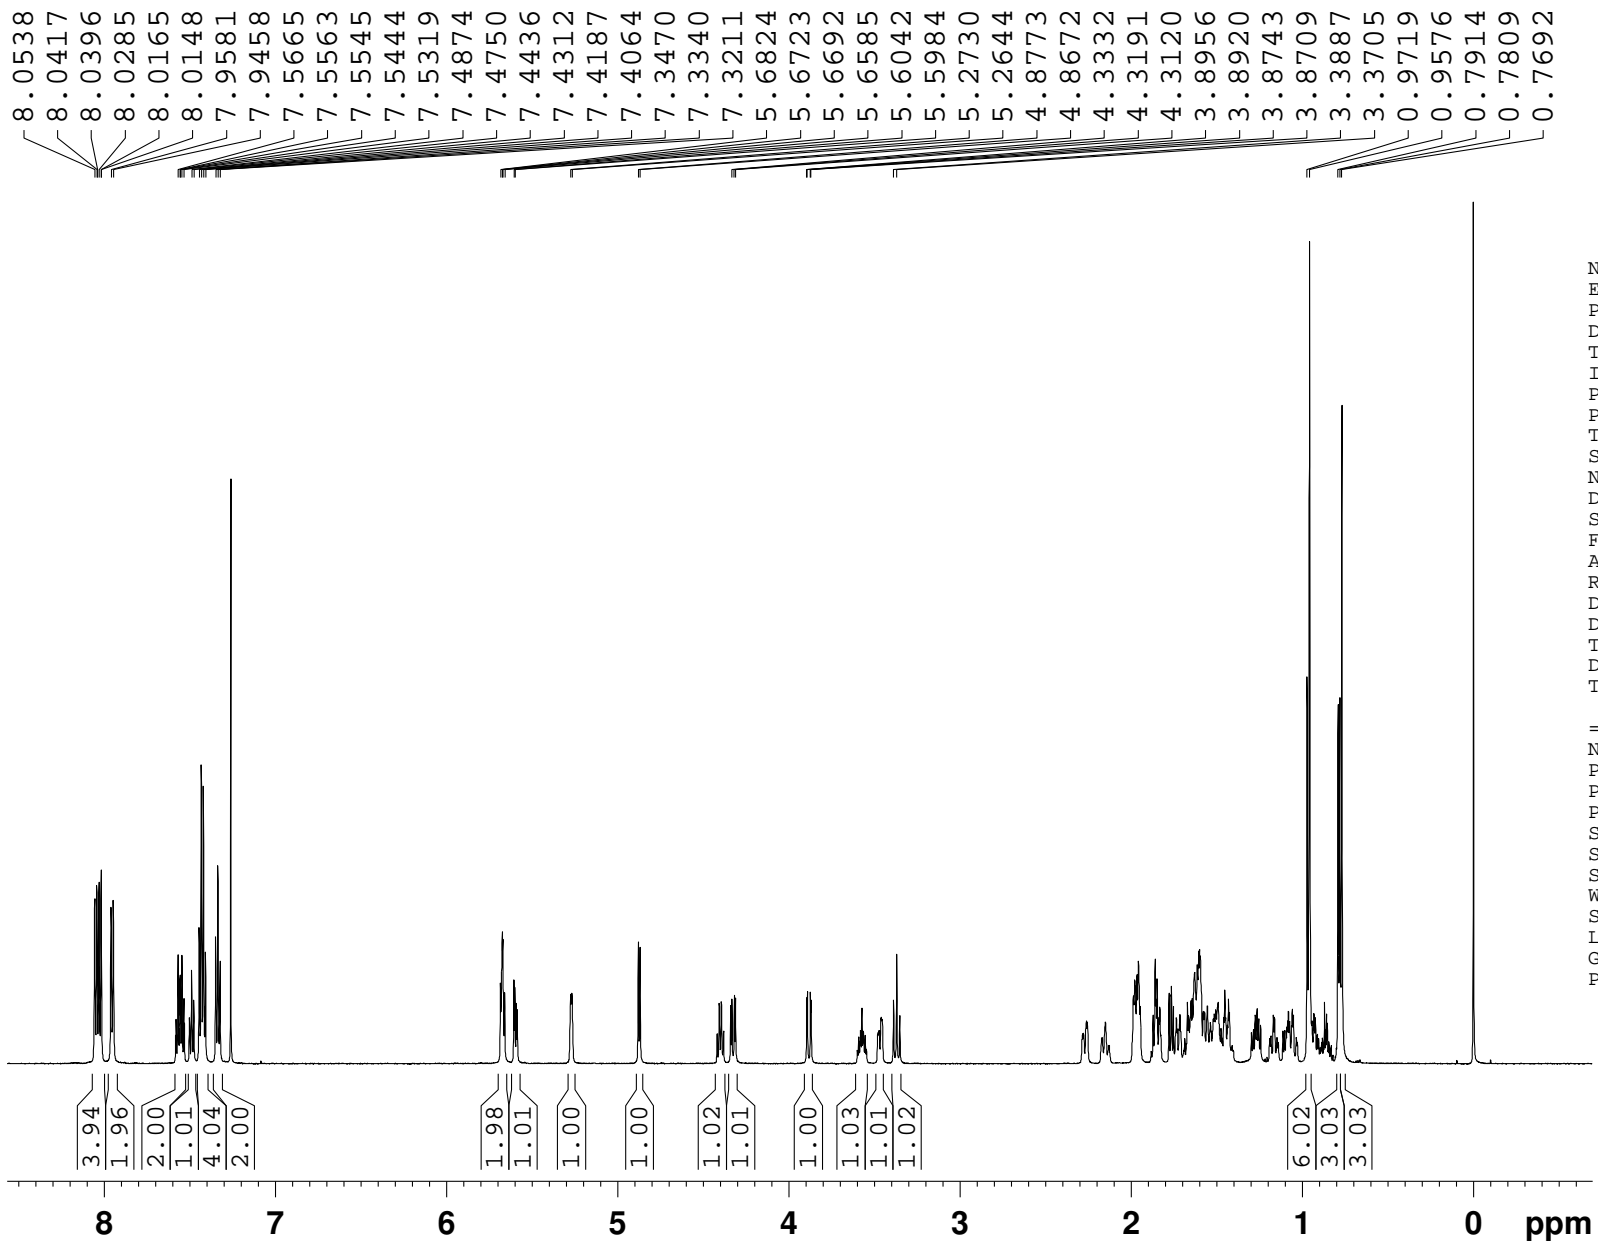

NAME ZP20101021  
EXPNO 1  
PROCNO 1  
Date\_ 20101022  
Time 10.13  
INSTRUM spect  
PROBHD 5 mm PABBO BB-  
PULPROG zg30  
TD 65536  
SOLVENT CDCl3  
NS 8  
DS 2  
SWH 17985.611 Hz  
FIDRES 0.274439 Hz  
AQ 1.8219786 sec  
RG 228  
DW 27.800 usec  
DE 6.50 usec  
TE 298.2 K  
D1 1.00000000 sec  
TD0 1

===== CHANNEL f1 =====  
NUC1 1H  
P1 11.10 usec  
PL1 -4.00 dB  
PL1W 34.70265579 W  
SF01 600.1324005 MHz  
SI 32768  
SF 600.1300104 MHz  
WDW EM  
SSB 0  
LB 0.30 Hz  
GB 0  
PC 1.00

<sup>13</sup>C NMR of Compound 2

AV-600-13C

Sample:

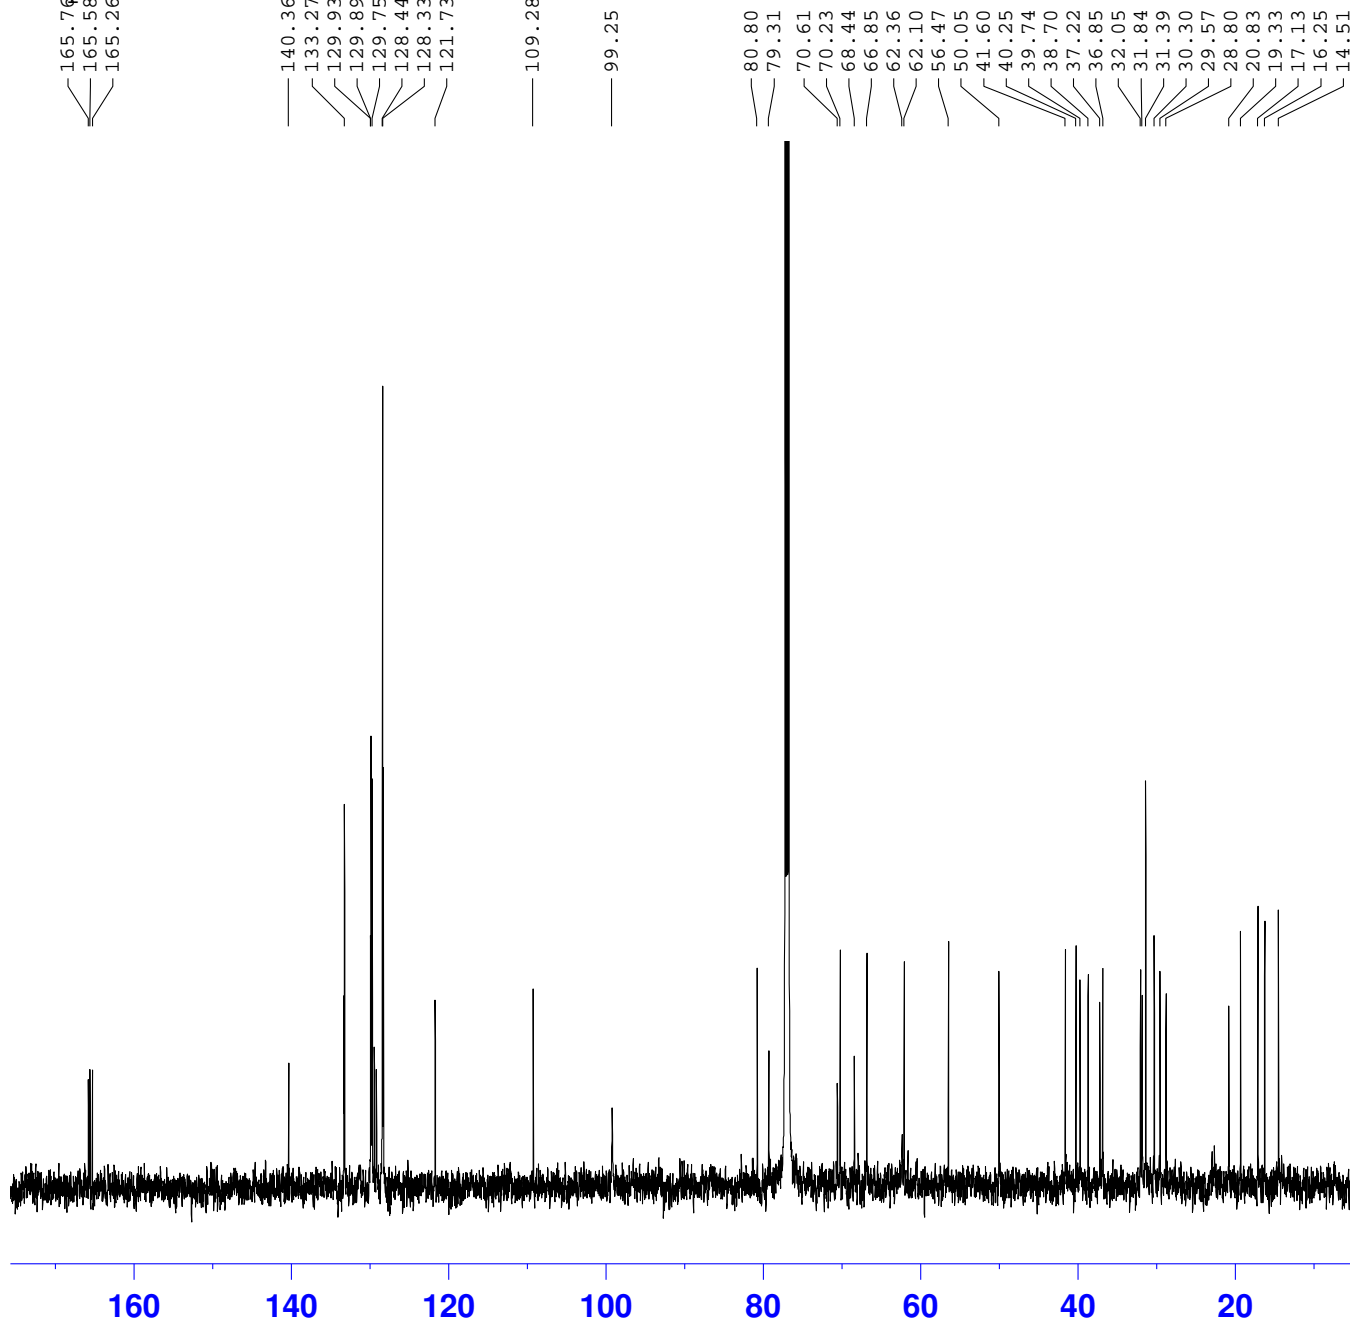

```
NAME          ZP20101021
EXPNO         2
PROCNO        1
Date_         20101022
Time          11.00
INSTRUM       spect
PROBHD        5 mm PABBO BB-
PULPROG       zgpg30
TD            65536
SOLVENT       CDCl3
NS            959
DS            2
SWH           45454.547 Hz
FIDRES        0.693581 Hz
AQ            0.7209570 sec
RG            26000
DW            11.000 usec
DE            6.50 usec
TE            298.2 K
D1            2.00000000 sec
D11           0.03000000 sec
TD0           1
```

```
===== CHANNEL f1 =====
NUC1           13C
P1             8.80 usec
PL1            1.00 dB
PL1W           83.20243835 W
SFO1           150.9178993 MHz
```

```
===== CHANNEL f2 =====
CPDPRG2       waltz16
NUC2           1H
PCPD2         80.00 usec
PL2           -4.00 dB
PL12          13.16 dB
PL13          16.00 dB
PL2W          34.70265579 W
PL12W         0.66736388 W
PL13W         0.34702653 W
SFO2          600.1324005 MHz
SI            32768
SF            150.9028090 MHz
WDW           EM
SSB           0
LB            3.00 Hz
GB            0
PC            1.40
```

1H NMR of Compound 4

AV-600-1H

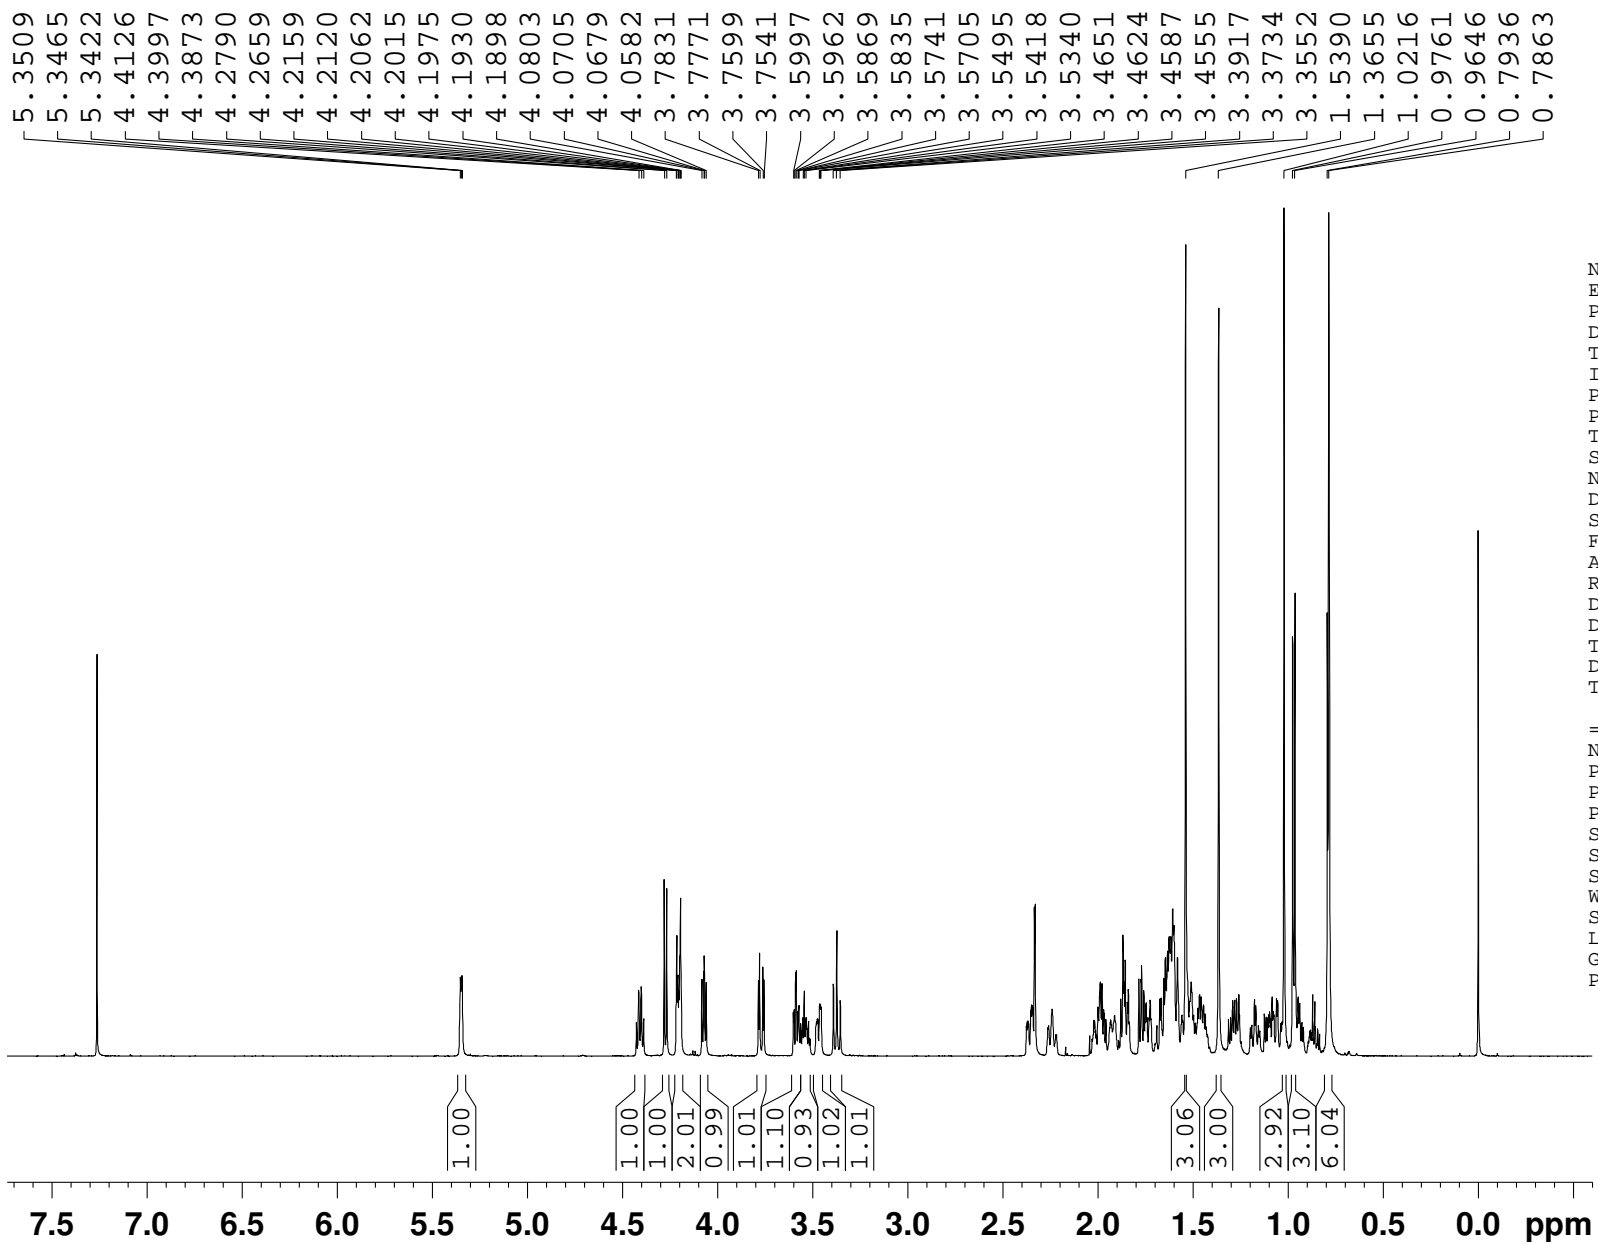

NAME ZP20101027B  
EXPNO 1  
PROCNO 1  
Date\_ 20101027  
Time 16.41  
INSTRUM spect  
PROBHD 5 mm PABBO BB-  
PULPROG zg30  
TD 65536  
SOLVENT CDCl3  
NS 8  
DS 2  
SWH 17985.611 Hz  
FIDRES 0.274439 Hz  
AQ 1.8219786 sec  
RG 228  
DW 27.800 usec  
DE 6.50 usec  
TE 298.2 K  
D1 1.00000000 sec  
TD0 1

===== CHANNEL f1 =====  
NUC1 1H  
P1 11.10 usec  
PL1 -4.00 dB  
PL1W 34.70265579 W  
SF01 600.1324005 MHz  
SI 32768  
SF 600.1300084 MHz  
WDW EM  
SSB 0  
LB 0.30 Hz  
GB 0  
PC 1.00

13C NMR of Compound 4

AV-600-13C

Sample:

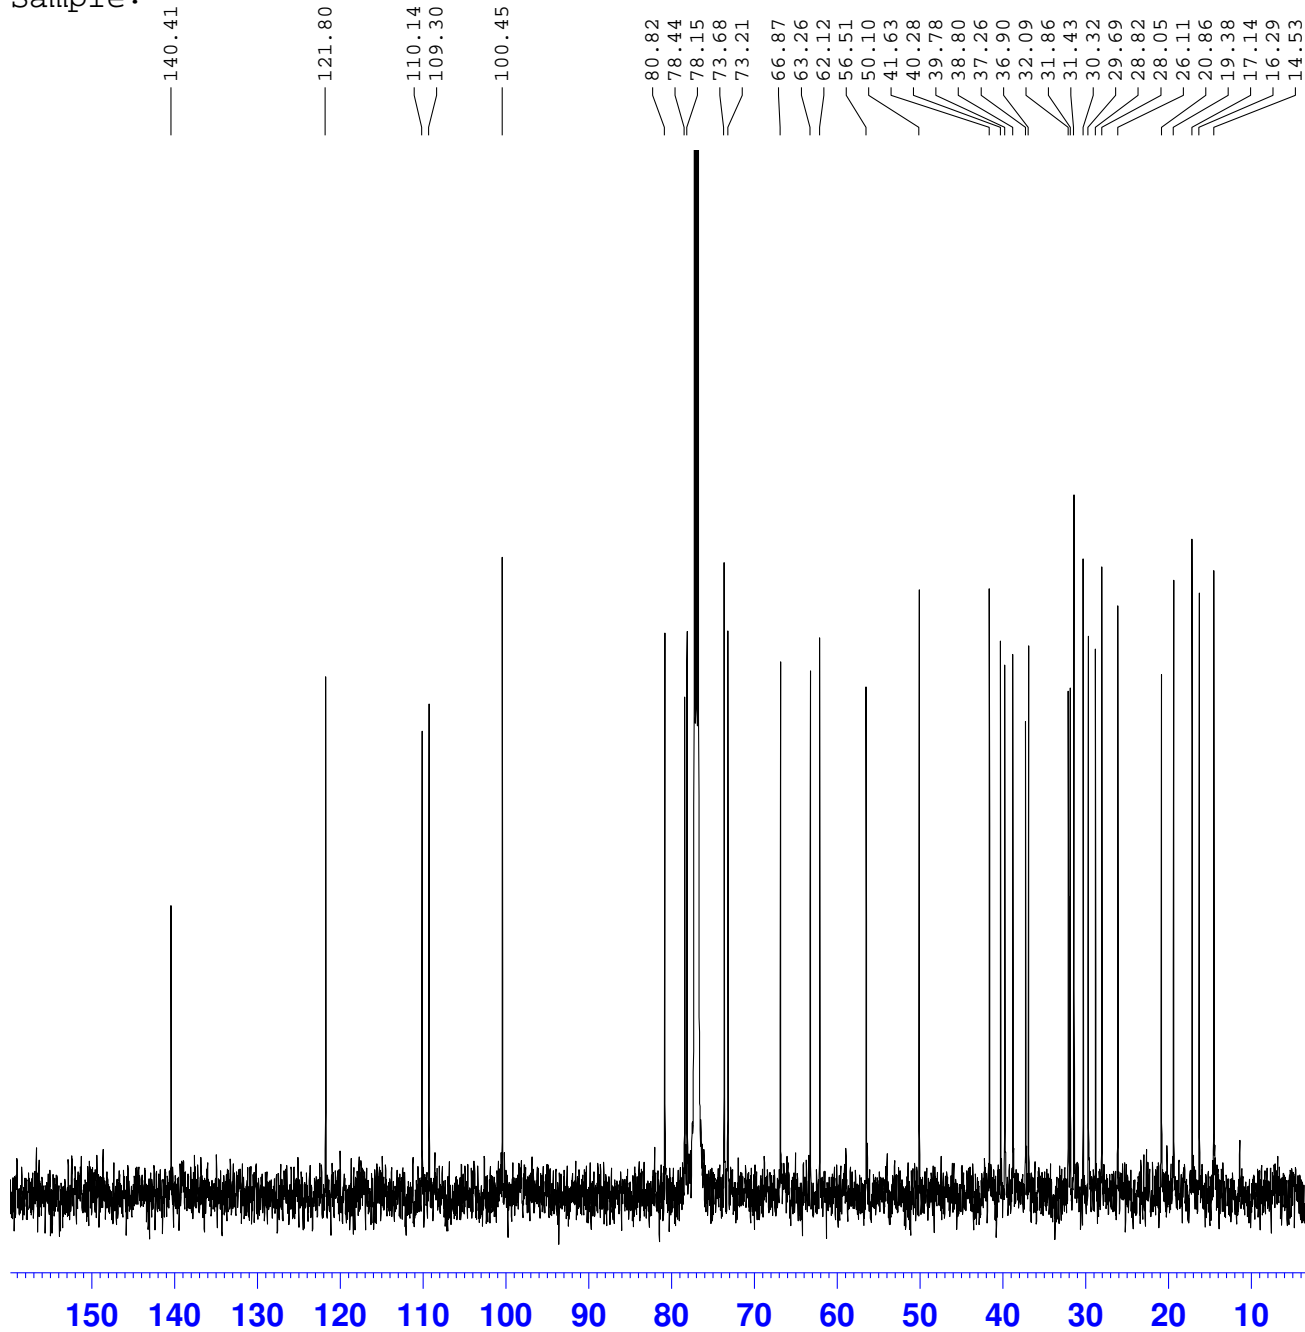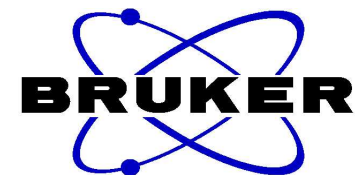

NAME ZP20101027B  
EXPNO 2  
PROCNO 1  
Date\_ 20101101  
Time 9.08  
INSTRUM spect  
PROBHD 5 mm PABBO BB-  
PULPROG zgpg30  
TD 65536  
SOLVENT CDCl3  
NS 894  
DS 2  
SWH 45454.547 Hz  
FIDRES 0.693581 Hz  
AQ 0.7209570 sec  
RG 20600  
DW 11.000 usec  
DE 6.50 usec  
TE 298.2 K  
D1 2.00000000 sec  
D11 0.03000000 sec  
TD0 1

==== CHANNEL f1 =====  
NUC1 13C  
P1 8.80 usec  
PL1 1.00 dB  
PL1W 83.20243835 W  
SFO1 150.9178993 MHz

==== CHANNEL f2 =====  
CPDPRG2 waltz16  
NUC2 1H  
PCPD2 80.00 usec  
PL2 -4.00 dB  
PL12 13.16 dB  
PL13 16.00 dB  
PL2W 34.70265579 W  
PL12W 0.66736388 W  
PL13W 0.34702653 W  
SFO2 600.1324005 MHz  
SI 32768  
SF 150.9028061 MHz  
WDW EM  
SSB 0  
LB 3.00 Hz  
GB 0  
PC 1.40

<sup>1</sup>H NMR of Compound 5

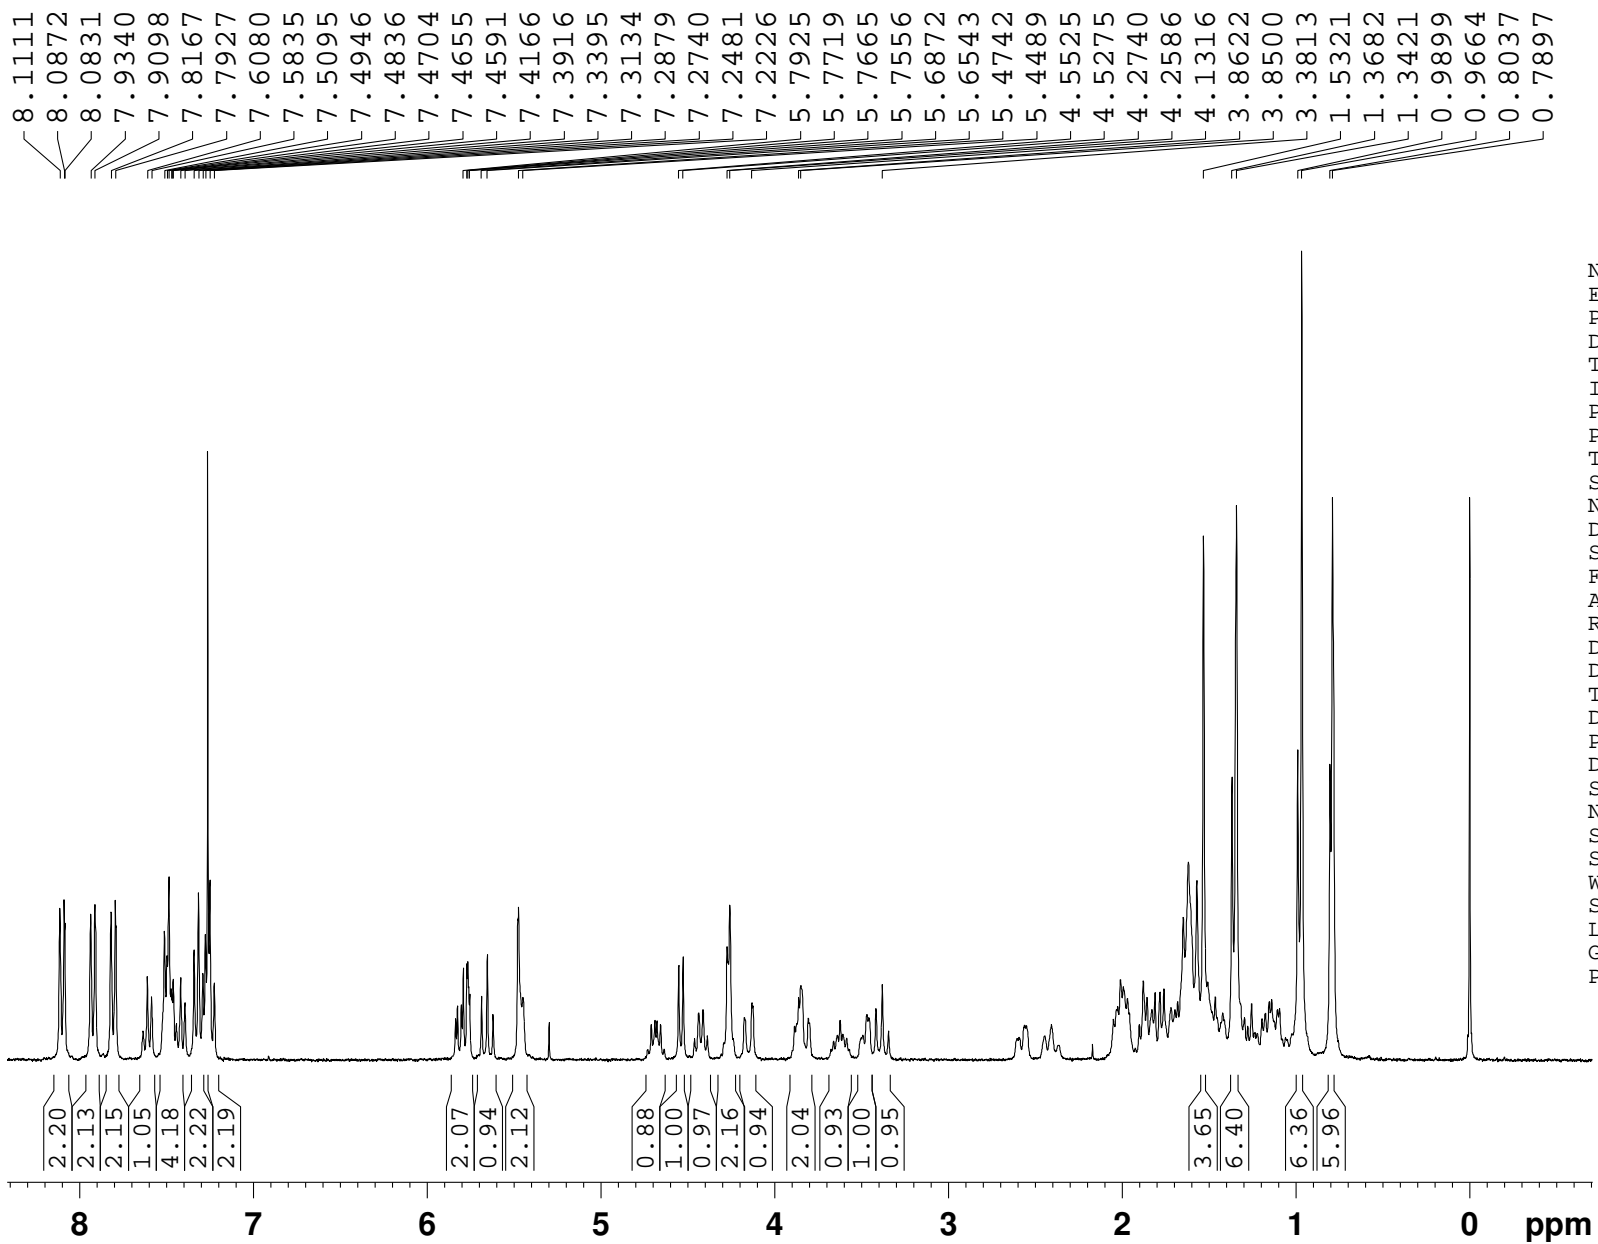

|         |                 |
|---------|-----------------|
| NAME    | ZP20110407      |
| EXPNO   | 1               |
| PROCNO  | 1               |
| Date_   | 20110408        |
| Time    | 7.24            |
| INSTRUM | arx300          |
| PROBHD  | 5 mm QNP 1H     |
| PULPROG | zg30            |
| TD      | 32768           |
| SOLVENT | DMSO            |
| NS      | 16              |
| DS      | 2               |
| SWH     | 6250.000 Hz     |
| FIDRES  | 0.190735 Hz     |
| AQ      | 2.621490 sec    |
| RG      | 4096            |
| DW      | 80.000 usec     |
| DE      | 114.29 usec     |
| TE      | 300.0 K         |
| D1      | 1.00000000 sec  |
| P1      | 12.40 usec      |
| DE      | 114.29 usec     |
| SFO1    | 300.1318534 MHz |
| NUCLEUS | <sup>1</sup> H  |
| SI      | 16384           |
| SF      | 300.1300056 MHz |
| WDW     | EM              |
| SSB     | 0               |
| LB      | 0.30 Hz         |
| GB      | 0               |
| PC      | 1.00            |



<sup>13</sup>C NMR of Compound 5

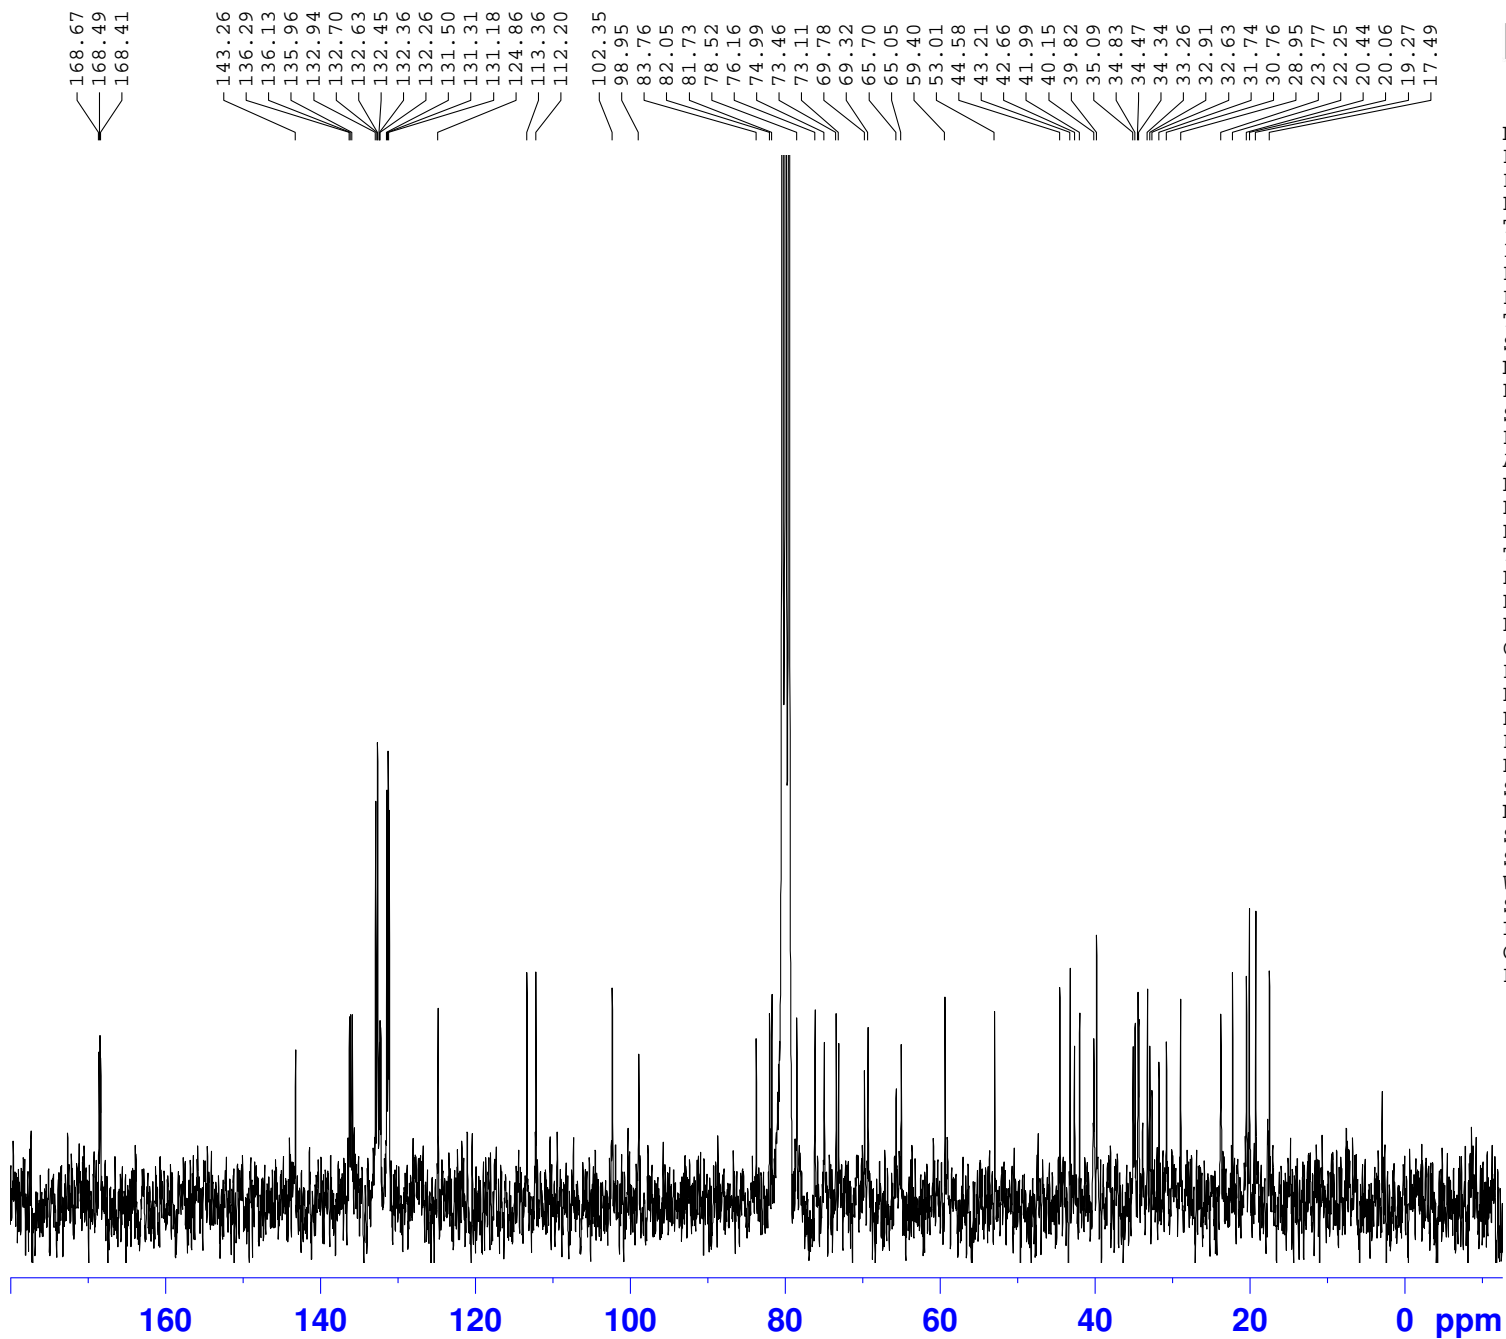

NAME ZP20110407  
EXPNO 2  
PROCNO 1  
Date\_ 20110421  
Time 9.43  
INSTRUM arx300  
PROBHD 5 mm QNP 1H  
PULPROG zgpg30  
TD 65536  
SOLVENT CDCl3  
NS 3445  
DS 2  
SWH 25000.000 Hz  
FIDRES 0.381470 Hz  
AQ 1.3107700 sec  
RG 32768  
DW 20.000 usec  
DE 28.57 usec  
TE 300.0 K  
D12 0.00002000 sec  
DL6 20.00 dB  
D1 2.00000000 sec  
CPDPRG waltz16  
P31 80.00 usec  
D11 0.03000000 sec  
DL5 20.00 dB  
P1 13.70 usec  
DE 28.57 usec  
SF01 75.4772501 MHz  
NUCLEUS <sup>13</sup>C  
SI 32768  
SF 75.4675280 MHz  
WDW EM  
SSB 0  
LB 3.00 Hz  
GB 0  
PC 1.40

1H NMR of Compound 6

AV-600-1H

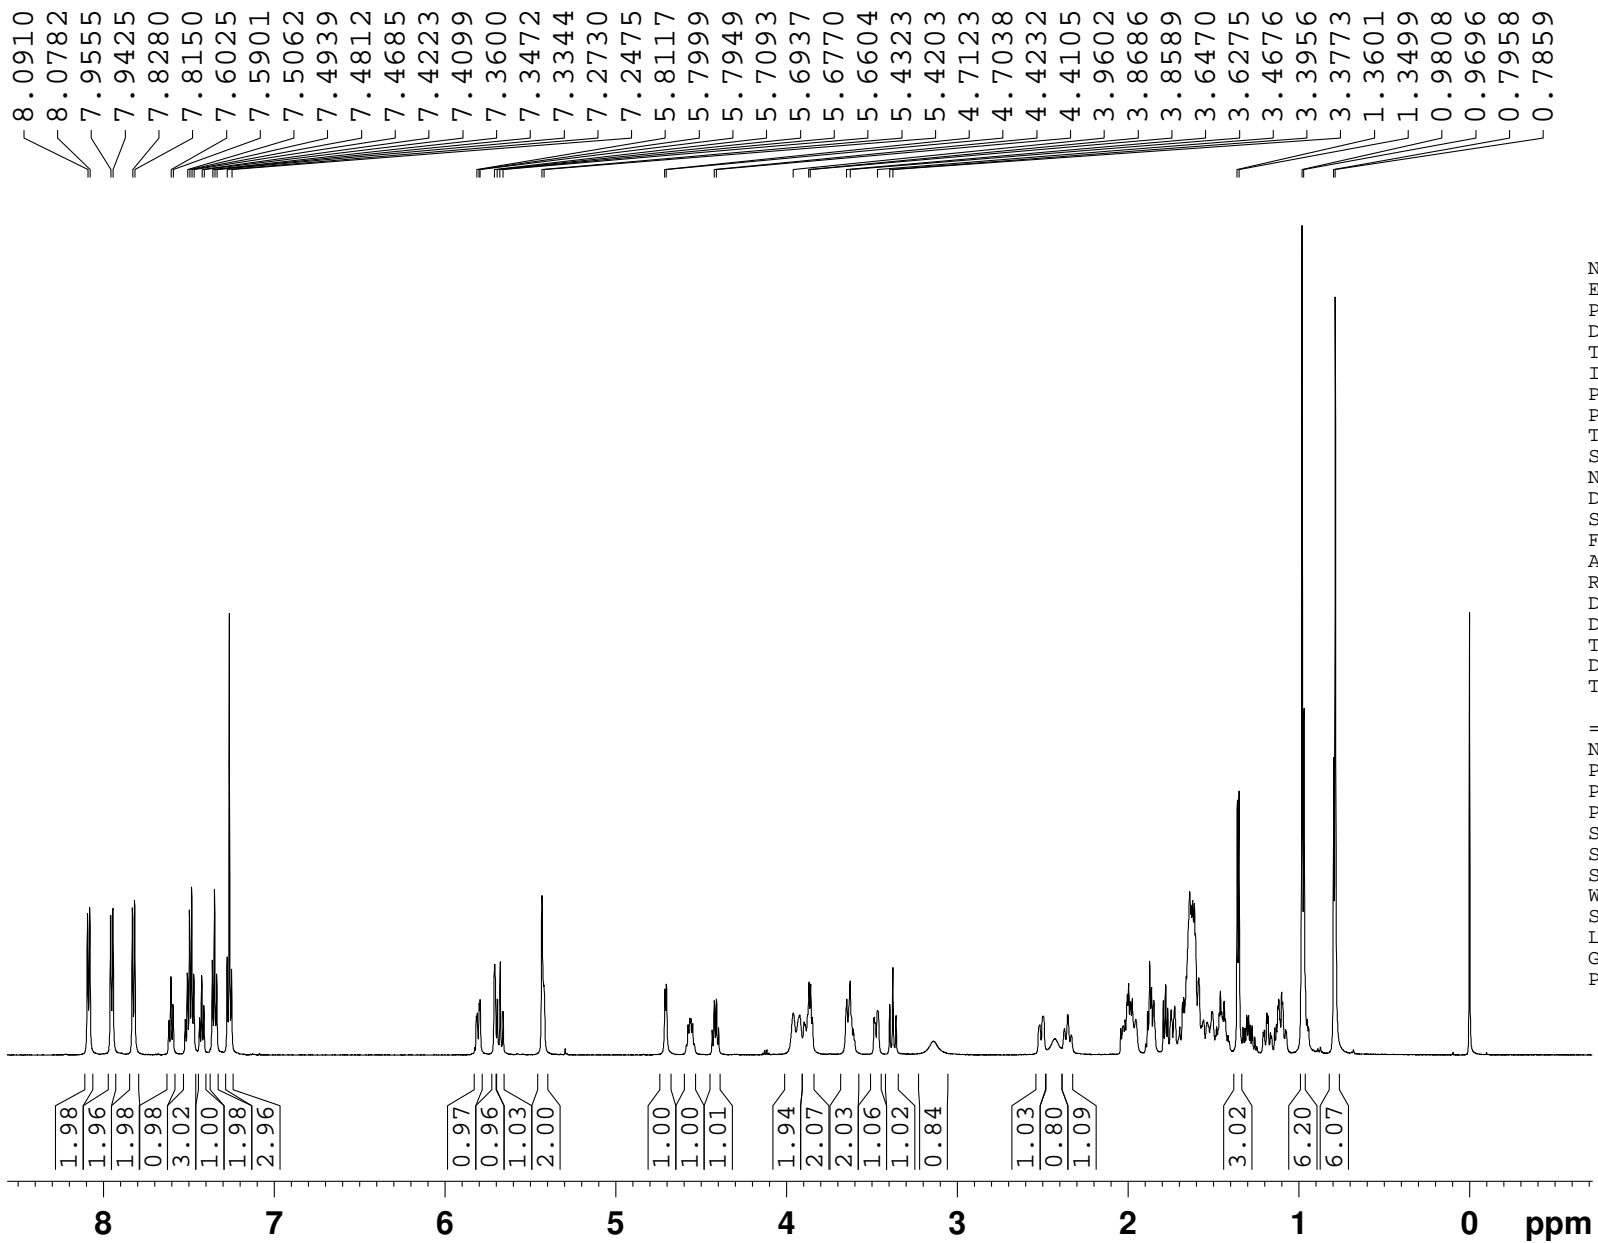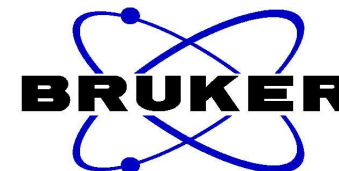

NAME ZP20101029  
EXPNO 1  
PROCNO 1  
Date\_ 20101101  
Time 16.19  
INSTRUM spect  
PROBHD 5 mm PABBO BB-  
PULPROG zg30  
TD 65536  
SOLVENT CDCl3  
NS 8  
DS 2  
SWH 17985.611 Hz  
FIDRES 0.274439 Hz  
AQ 1.8219786 sec  
RG 203  
DW 27.800 usec  
DE 6.50 usec  
TE 298.2 K  
D1 1.00000000 sec  
TD0 1

==== CHANNEL f1 =====  
NUC1 1H  
P1 11.10 usec  
PL1 -4.00 dB  
PL1W 34.70265579 W  
SF01 600.1324005 MHz  
SI 32768  
SF 600.1300094 MHz  
WDW EM  
SSB 0  
LB 0.30 Hz  
GB 0  
PC 1.00

<sup>13</sup>C NMR of Compound 6

AV-600-13C

Sample:

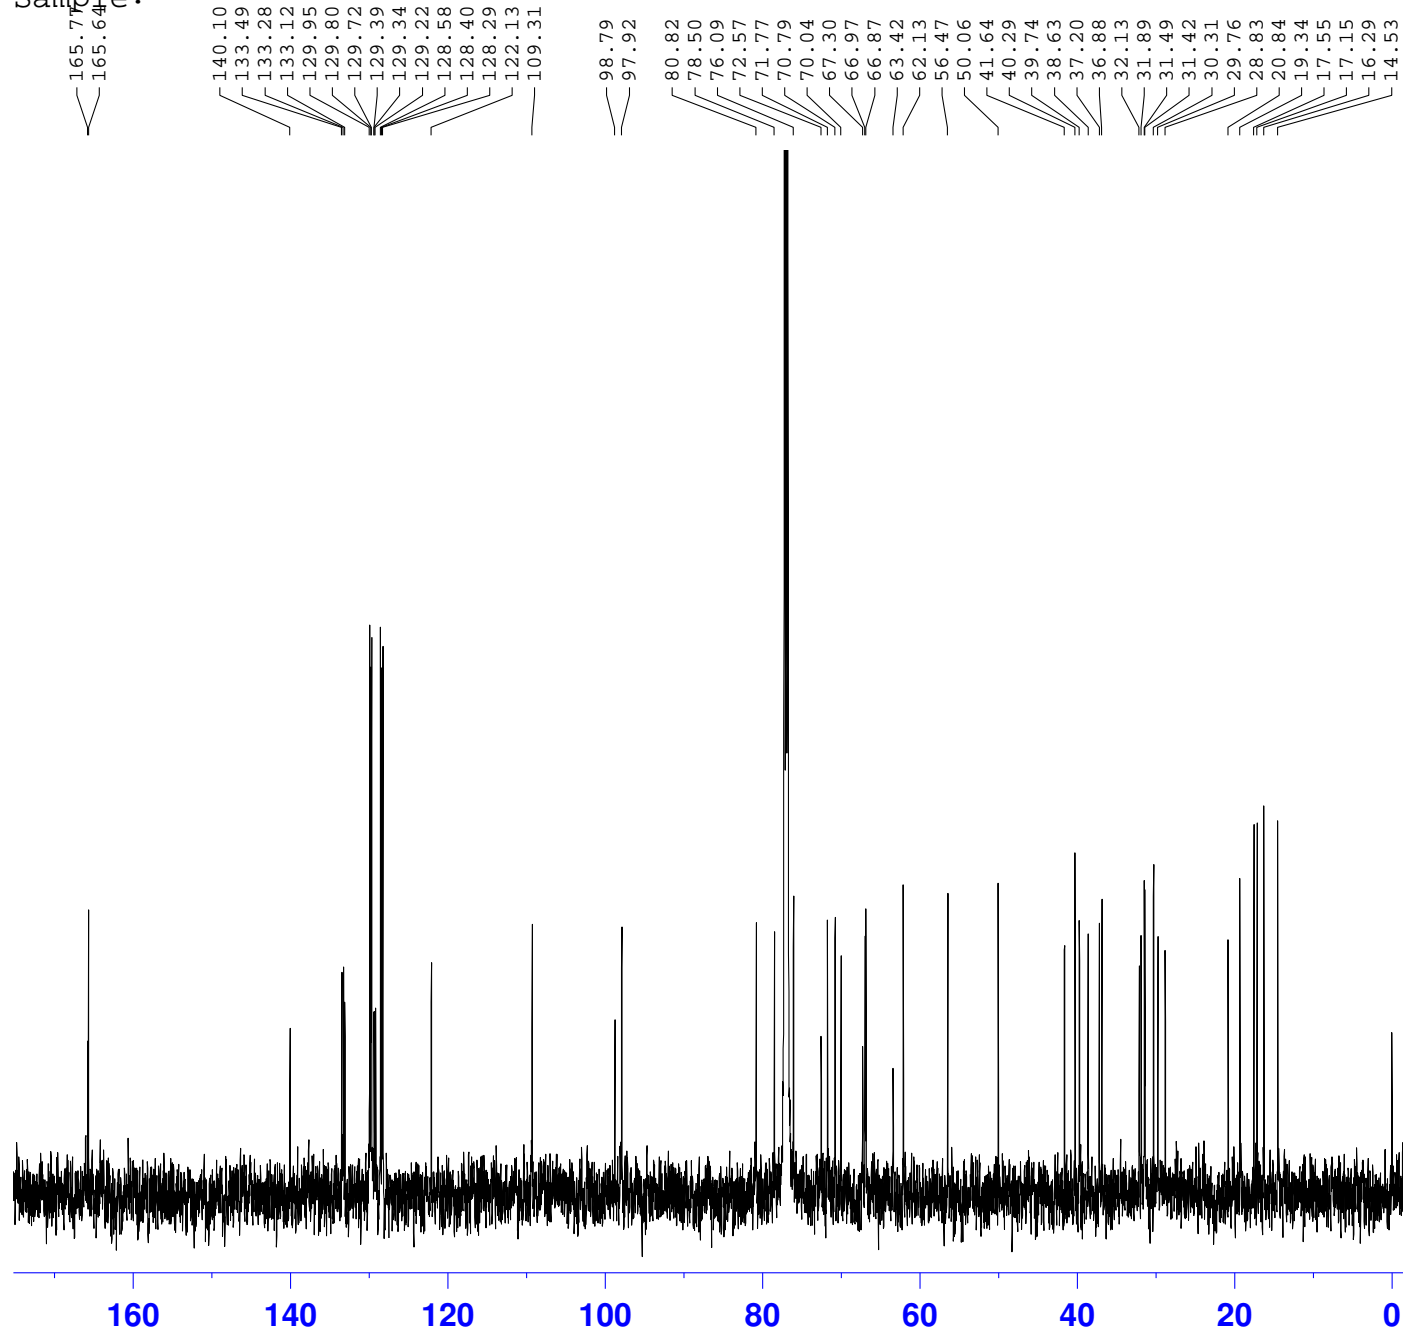

```
NAME          ZP20101029
EXPNO         2
PROCNO        1
Date_         20101101
Time          16.26
INSTRUM       spect
PROBHD        5 mm PABBO BB-
PULPROG       zgpg30
TD            65536
SOLVENT       CDCl3
NS            458
DS            2
SWH           45454.547 Hz
FIDRES        0.693581 Hz
AQ            0.7209570 sec
RG            20600
DW            11.000 usec
DE            6.50 usec
TE            298.2 K
D1            2.00000000 sec
D11           0.03000000 sec
TD0           1
```

```
===== CHANNEL f1 =====
NUC1           13C
P1             8.80 usec
PL1            1.00 dB
PL1W           83.20243835 W
SFO1           150.9178993 MHz
```

```
===== CHANNEL f2 =====
CPDPRG2       waltz16
NUC2           1H
PCPD2         80.00 usec
PL2            -4.00 dB
PL12           13.16 dB
PL13           16.00 dB
PL2W           34.70265579 W
PL12W          0.66736388 W
PL13W          0.34702653 W
SFO2           600.1324005 MHz
SI             32768
SF             150.9028063 MHz
WDW            EM
SSB            0
LB             3.00 Hz
GB             0
PC             1.40
```

AV-600-1H

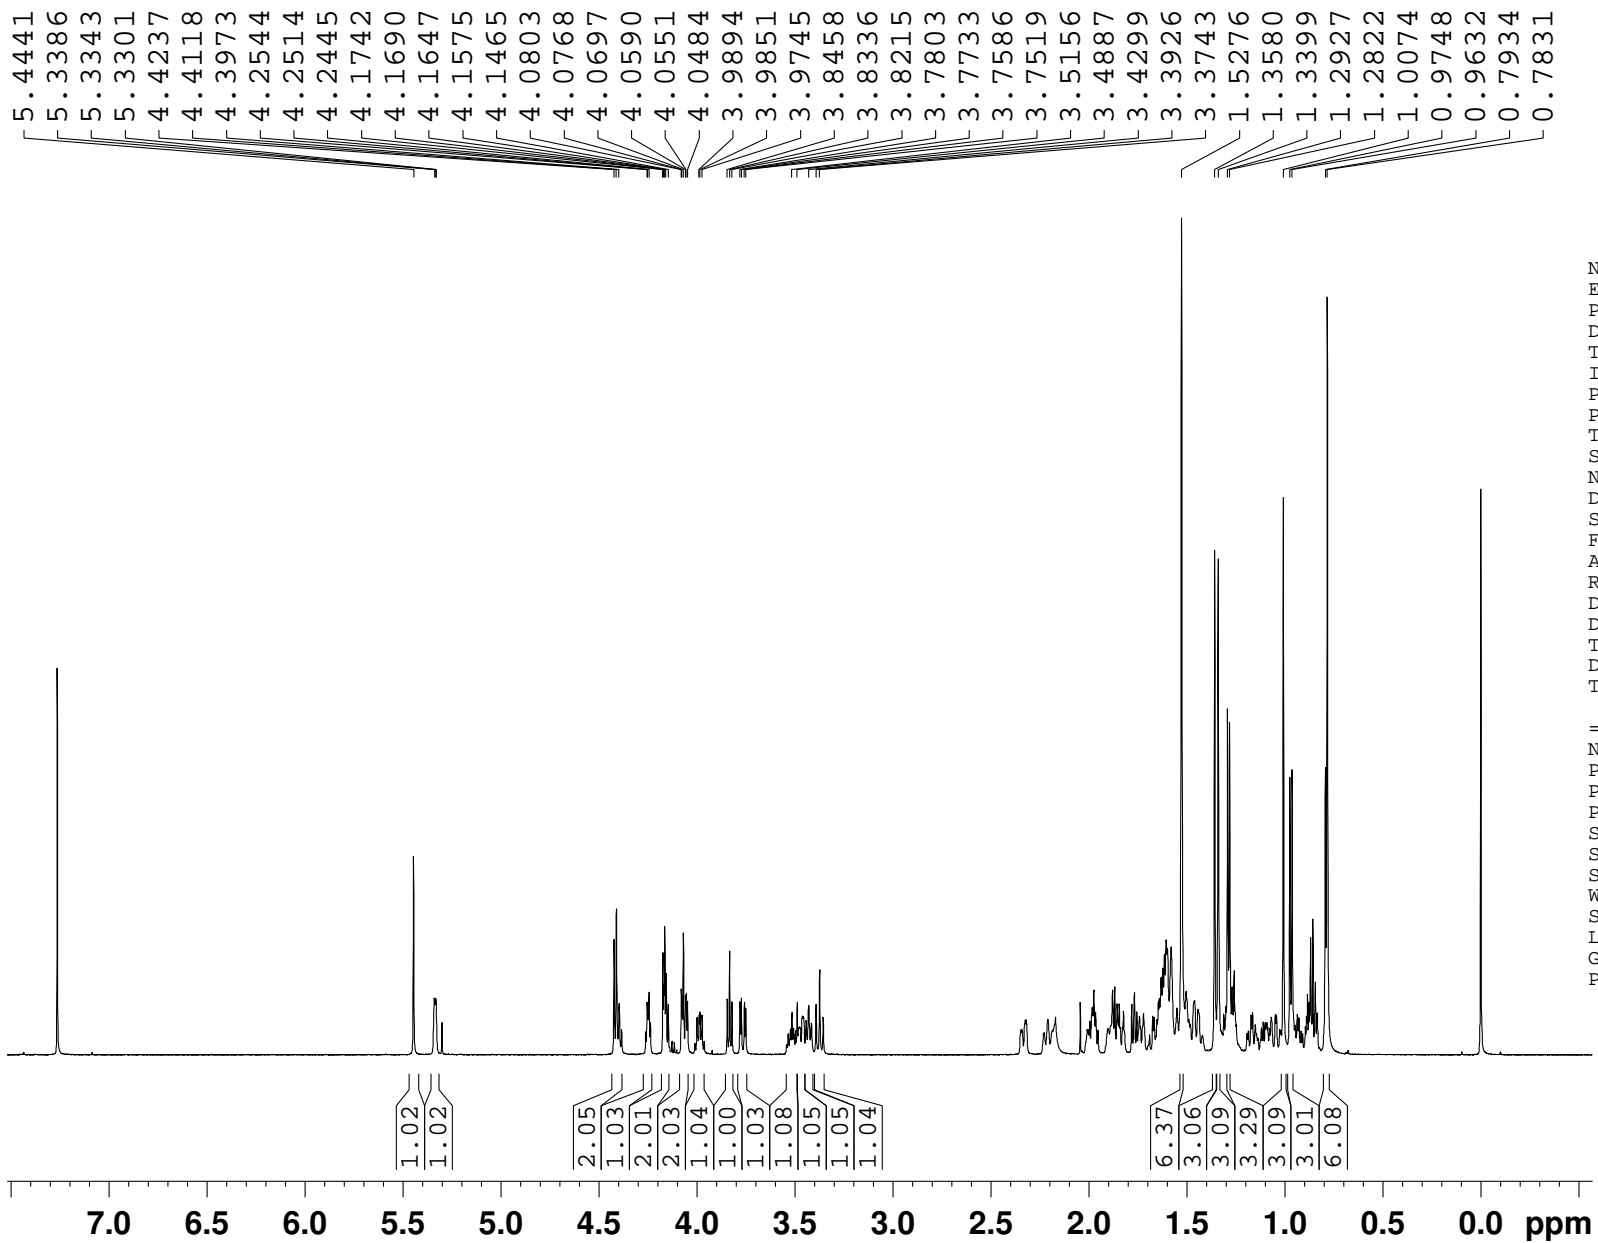

NAME ZP20101101  
EXPNO 1  
PROCNO 1  
Date\_ 20101101  
Time 17.01  
INSTRUM spect  
PROBHD 5 mm PABBO BB-  
PULPROG zg30  
TD 65536  
SOLVENT CDCl3  
NS 8  
DS 2  
SWH 17985.611 Hz  
FIDRES 0.274439 Hz  
AQ 1.8219786 sec  
RG 287  
DW 27.800 usec  
DE 6.50 usec  
TE 298.2 K  
D1 1.00000000 sec  
TD0 1

===== CHANNEL f1 =====  
NUC1 1H  
P1 11.10 usec  
PL1 -4.00 dB  
PL1W 34.70265579 W  
SF01 600.1324005 MHz  
SI 32768  
SF 600.1300086 MHz  
WDW EM  
SSB 0  
LB 0.30 Hz  
GB 0  
PC 1.00

<sup>13</sup>C NMR of Compound 7

AV-600-13C

Sample:

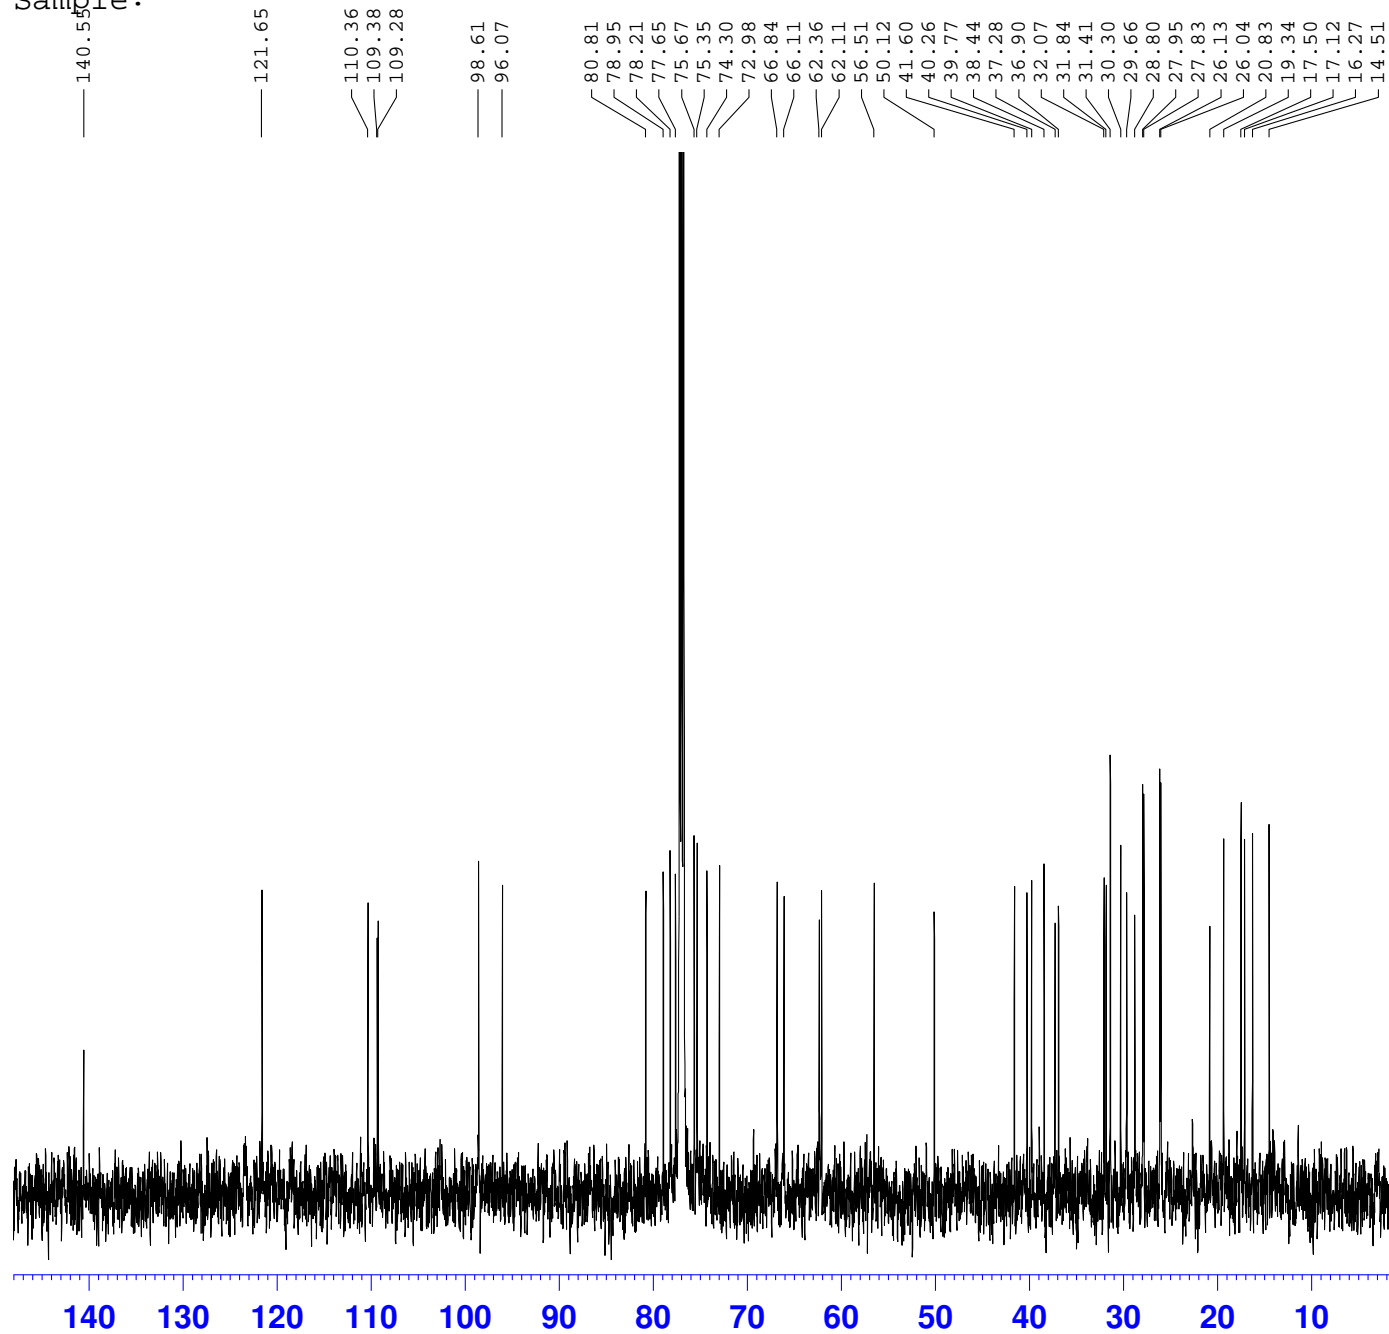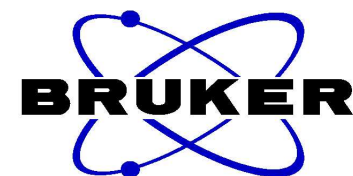

```
NAME          ZP201011101
EXPNO         2
PROCNO        1
Date_         20101101
Time          11.16
INSTRUM       spect
PROBHD        5 mm PABBO BB-
PULPROG       zgpg30
TD            65536
SOLVENT       CDCl3
NS            205
DS            2
SWH           45454.547 Hz
FIDRES        0.693581 Hz
AQ            0.7209570 sec
RG            20600
DW            11.000 usec
DE            6.50 usec
TE            298.2 K
D1            2.00000000 sec
D11           0.03000000 sec
TD0           1
```

```
===== CHANNEL f1 =====
NUC1           13C
P1             8.80 usec
PL1            1.00 dB
PL1W           83.20243835 W
SFO1           150.9178993 MHz
```

```
===== CHANNEL f2 =====
CPDPRG2       waltz16
NUC2           1H
PCPD2         80.00 usec
PL2            -4.00 dB
PL12           13.16 dB
PL13           16.00 dB
PL2W           34.70265579 W
PL12W          0.66736388 W
PL13W          0.34702653 W
SFO2           600.1324005 MHz
SI             32768
SF             150.9028090 MHz
WDW            EM
SSB            0
LB             3.00 Hz
GB            0
PC             1.40
```

<sup>1</sup>H NMR of Compound 8

AV-600-1H

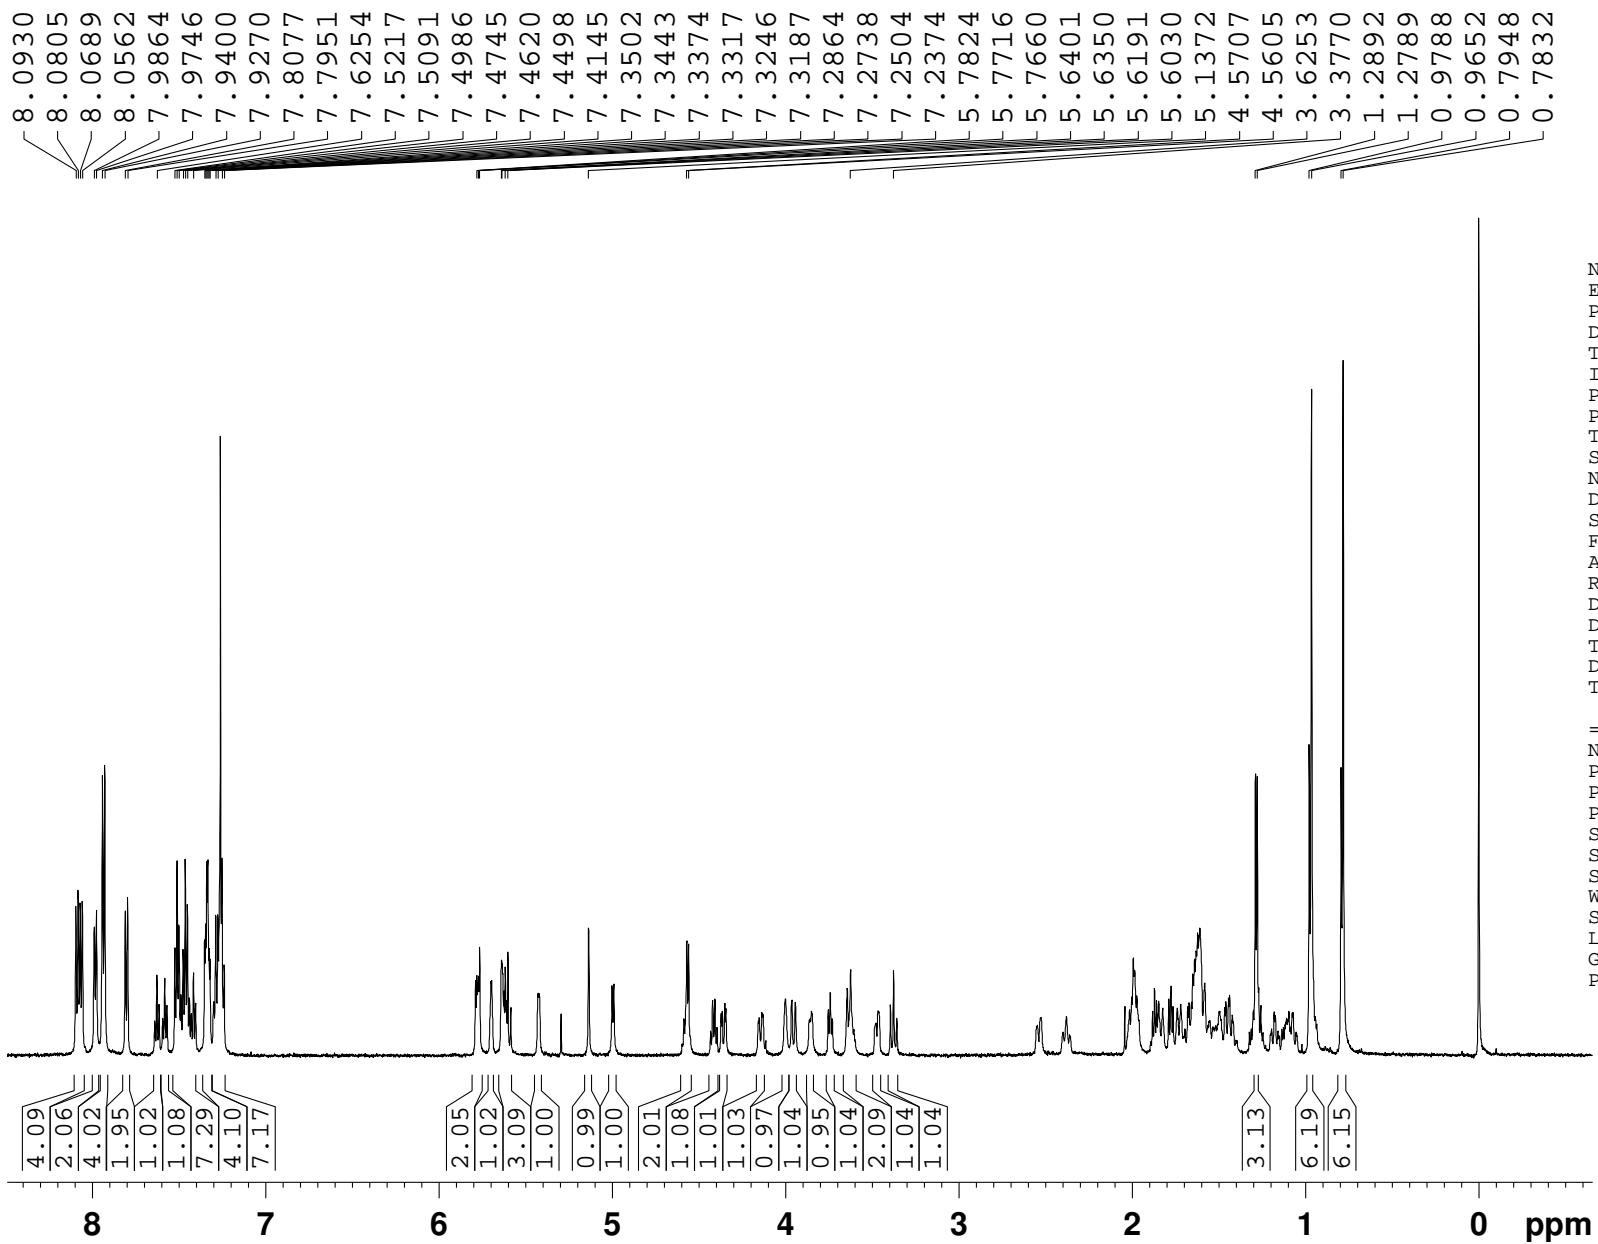

NAME ZP20101111B  
EXPNO 1  
PROCNO 1  
Date\_ 20101111  
Time 10.40  
INSTRUM spect  
PROBHD 5 mm PABBO BB-  
PULPROG zg30  
TD 65536  
SOLVENT CDCl3  
NS 1  
DS 2  
SWH 17985.611 Hz  
FIDRES 0.274439 Hz  
AQ 1.8219786 sec  
RG 228  
DW 27.800 usec  
DE 6.50 usec  
TE 298.2 K  
D1 1.00000000 sec  
TD0 1

===== CHANNEL f1 =====  
NUC1 1H  
P1 11.10 usec  
PL1 -4.00 dB  
PL1W 34.70265579 W  
SF01 600.1324005 MHz  
SI 32768  
SF 600.1300103 MHz  
WDW EM  
SSB 0  
LB 0.30 Hz  
GB 0  
PC 1.00

13C NMR of Compound 8

AV-600-13C

Sample:

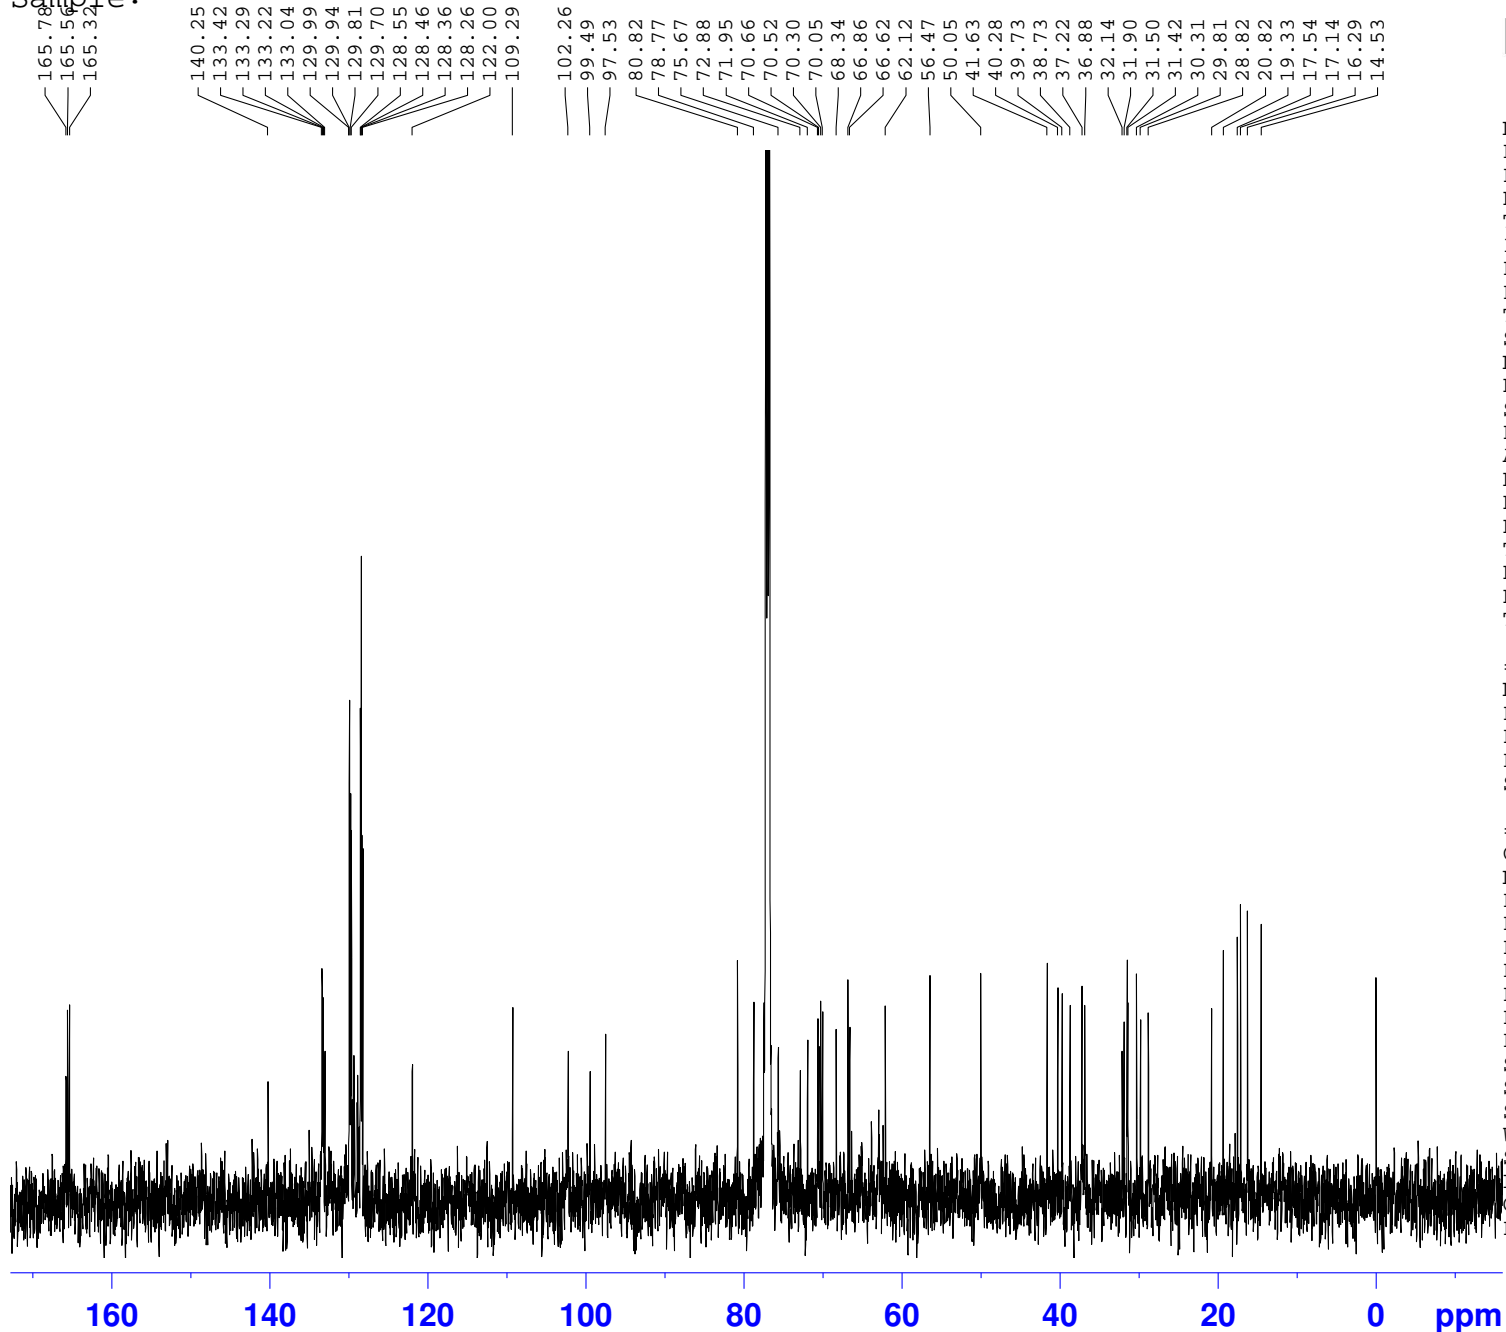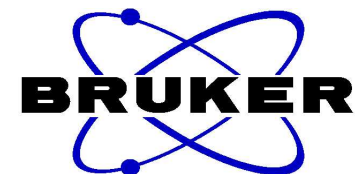

```
NAME          ZP20101111B
EXPNO         2
PROCNO       1
Date_        20101112
Time         17.43
INSTRUM      spect
PROBHD       5 mm PABBO BB-
PULPROG      zgpg30
TD           65536
SOLVENT      CDCl3
NS           675
DS           2
SWH          45454.547 Hz
FIDRES       0.693581 Hz
AQ           0.7209570 sec
RG           20600
DW           11.000 usec
DE           6.50 usec
TE           298.2 K
D1           2.00000000 sec
D11          0.03000000 sec
TD0          1
```

```
===== CHANNEL f1 =====
NUC1          13C
P1            8.80 usec
PL1           1.00 dB
PL1W          83.20243835 W
SFO1          150.9178993 MHz
```

```
===== CHANNEL f2 =====
CPDPRG2      waltz16
NUC2          1H
PCPD2        80.00 usec
PL2           -4.00 dB
PL12          13.16 dB
PL13          16.00 dB
PL2W          34.70265579 W
PL12W         0.66736388 W
PL13W         0.34702653 W
SFO2          600.1324005 MHz
SI            32768
SF            150.9028073 MHz
WDW           EM
SSB           0
LB            3.00 Hz
GB            0
PC            1.40
```

<sup>1</sup>H NMR of Compound 9

AV-600-1H

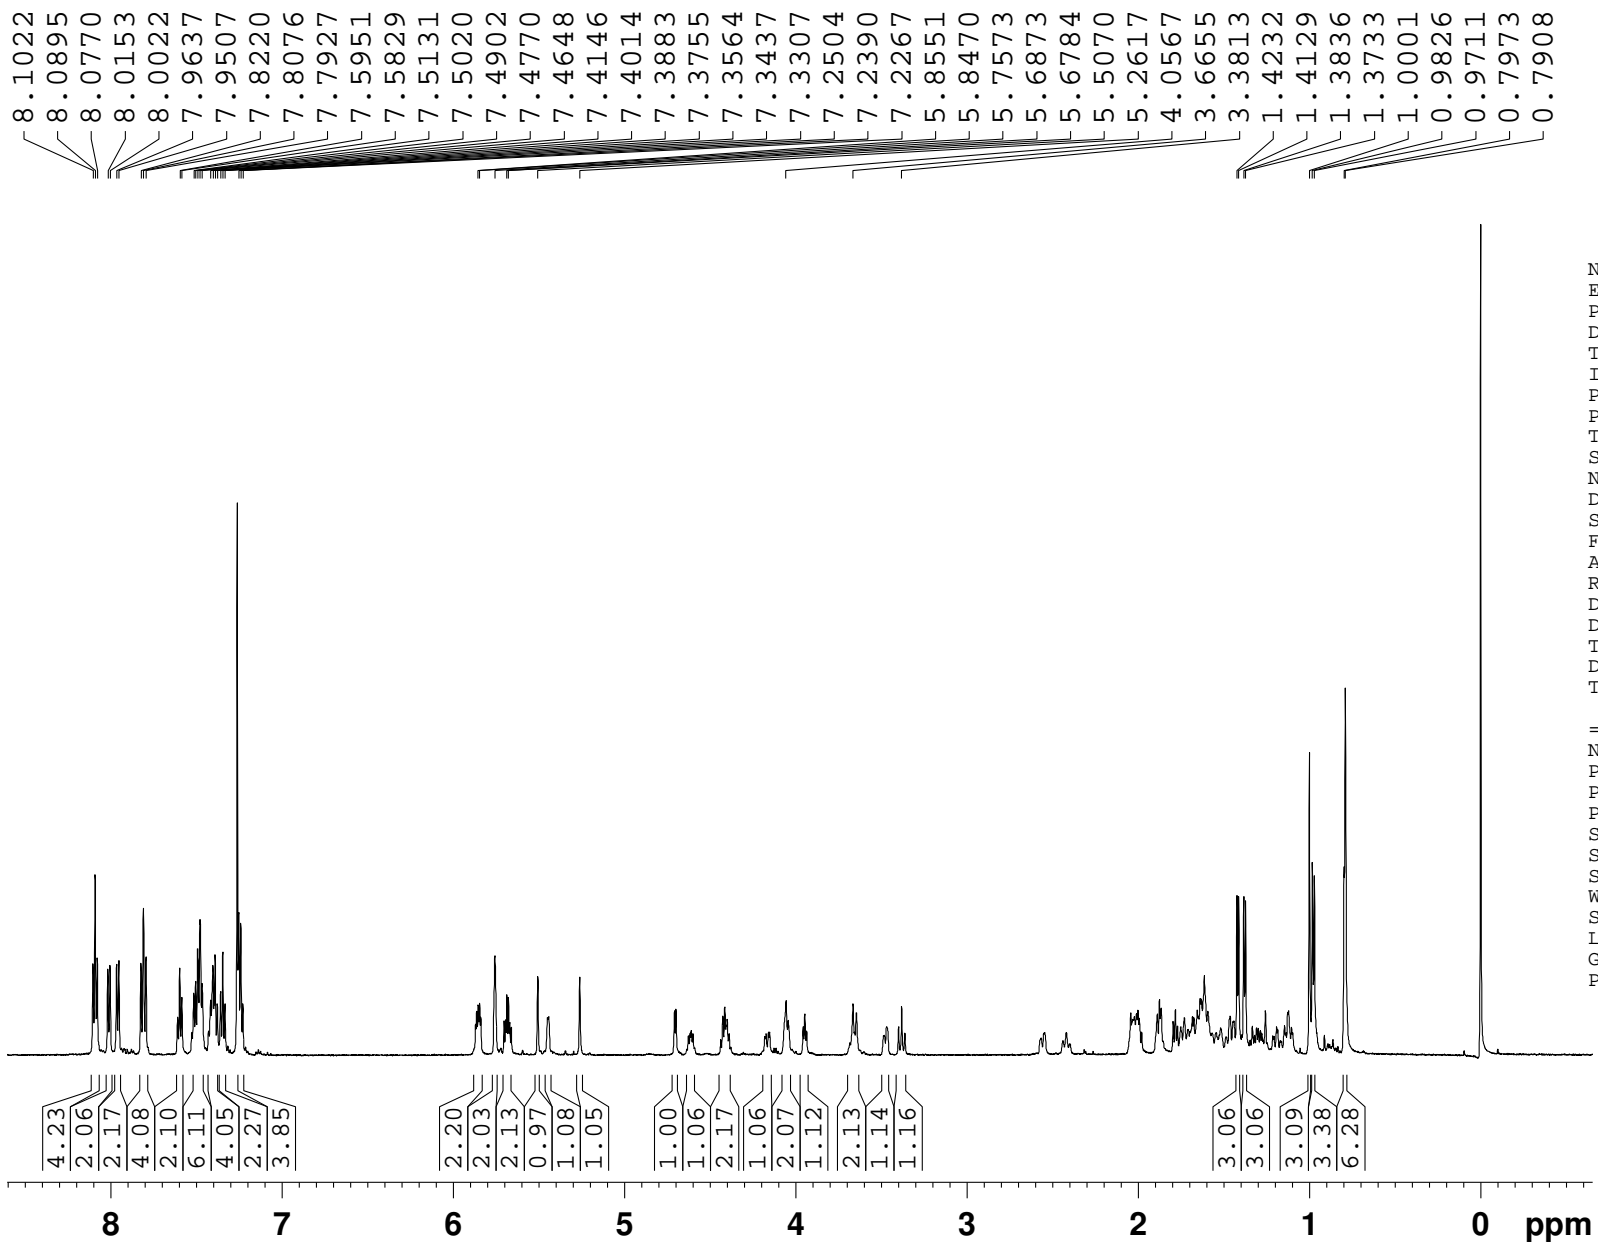

NAME ZP20101109  
EXPNO 1  
PROCNO 1  
Date\_ 20101109  
Time 12.04  
INSTRUM spect  
PROBHD 5 mm PABBO BB-  
PULPROG zg30  
TD 65536  
SOLVENT CDCl3  
NS 8  
DS 2  
SWH 17985.611 Hz  
FIDRES 0.274439 Hz  
AQ 1.8219786 sec  
RG 362  
DW 27.800 usec  
DE 6.50 usec  
TE 298.2 K  
D1 1.00000000 sec  
TD0 1

===== CHANNEL f1 =====  
NUC1 1H  
P1 11.10 usec  
PL1 -4.00 dB  
PL1W 34.70265579 W  
SF01 600.1324005 MHz  
SI 32768  
SF 600.1300104 MHz  
WDW EM  
SSB 0  
LB 0.30 Hz  
GB 0  
PC 1.00



<sup>13</sup>C NMR of Compound 9

AV-600-13C

Sample:

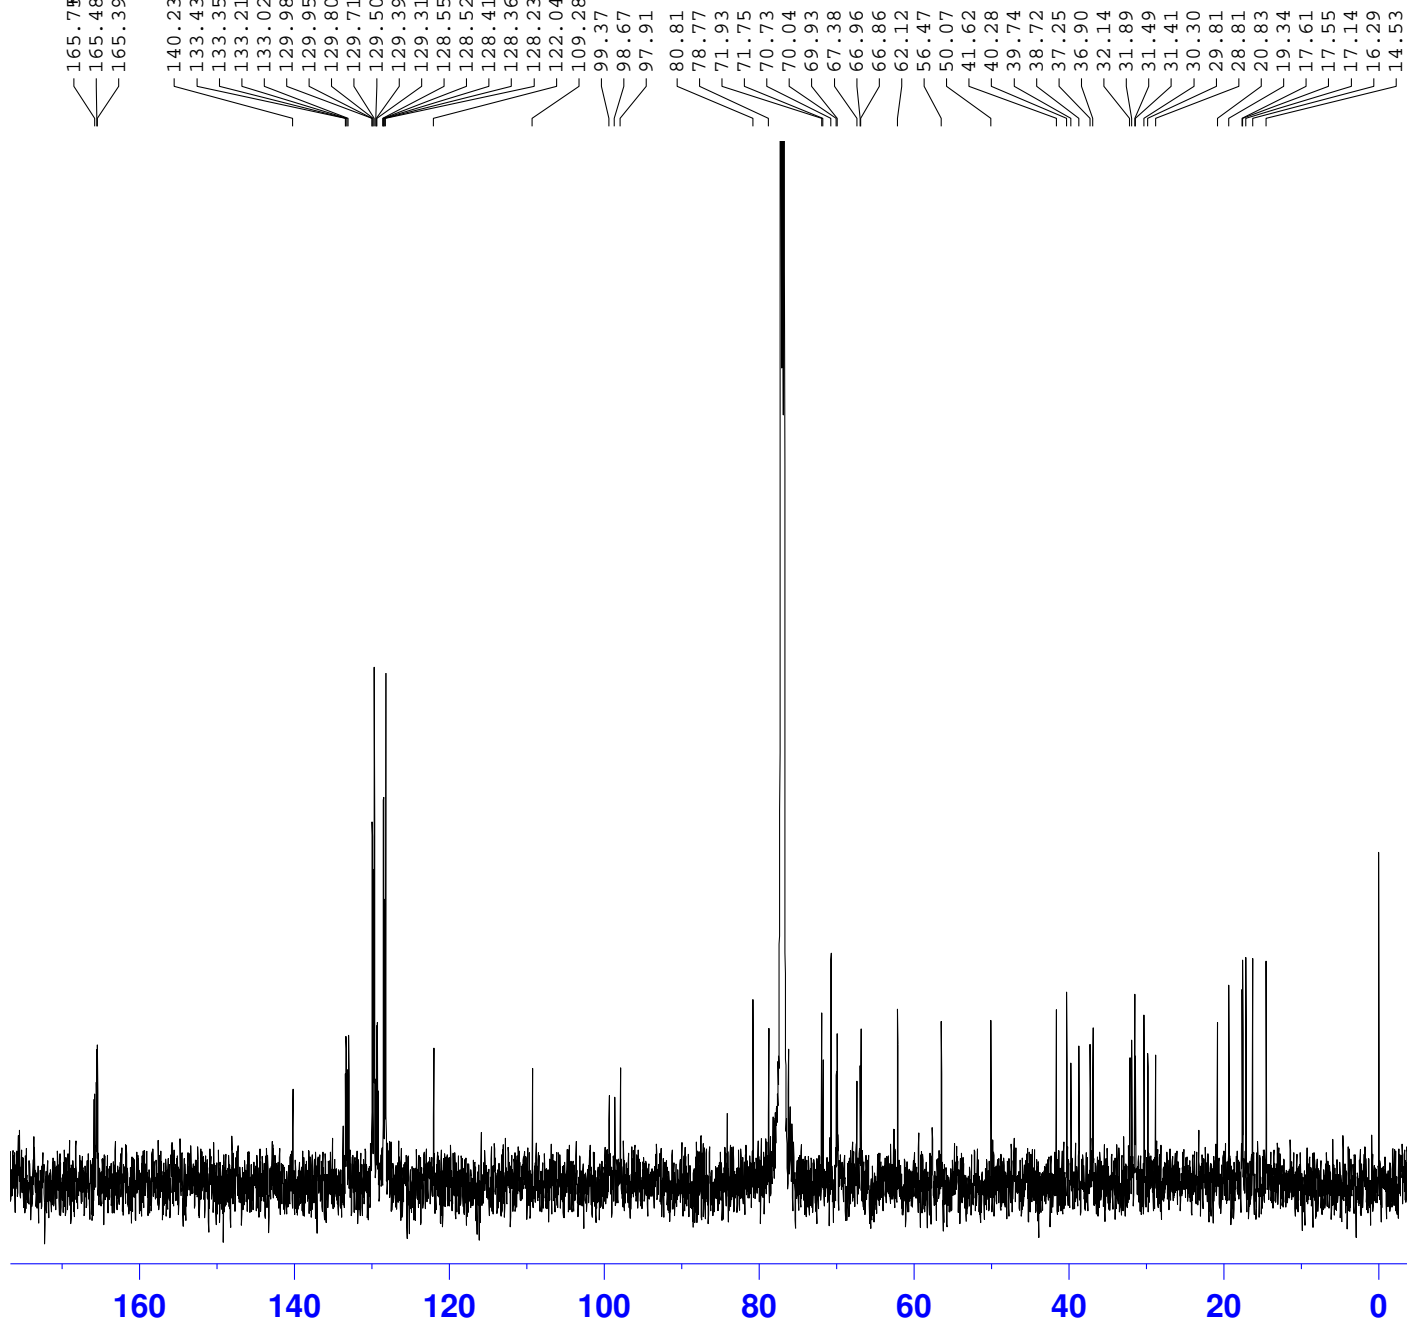

NAME ZP20101109  
EXPNO 2  
PROCNO 1  
Date\_ 20101112  
Time 21.24  
INSTRUM spect  
PROBHD 5 mm PABBO BB-  
PULPROG zgpg30  
TD 65536  
SOLVENT CDCl3  
NS 1626  
DS 2  
SWH 45454.547 Hz  
FIDRES 0.693581 Hz  
AQ 0.7209570 sec  
RG 20600  
DW 11.000 usec  
DE 6.50 usec  
TE 298.2 K  
D1 2.00000000 sec  
D11 0.03000000 sec  
TD0 1

==== CHANNEL f1 =====  
NUC1 13C  
P1 8.80 usec  
PL1 1.00 dB  
PL1W 83.20243835 W  
SFO1 150.9178993 MHz

==== CHANNEL f2 =====  
CPDPRG2 waltz16  
NUC2 1H  
PCPD2 80.00 usec  
PL2 -4.00 dB  
PL12 13.16 dB  
PL13 16.00 dB  
PL2W 34.70265579 W  
PL12W 0.66736388 W  
PL13W 0.34702653 W  
SFO2 600.1324005 MHz  
SI 32768  
SF 150.9028090 MHz  
WDW EM  
SSB 0  
LB 3.00 Hz  
GB 0  
PC 1.40

AV-600-1H

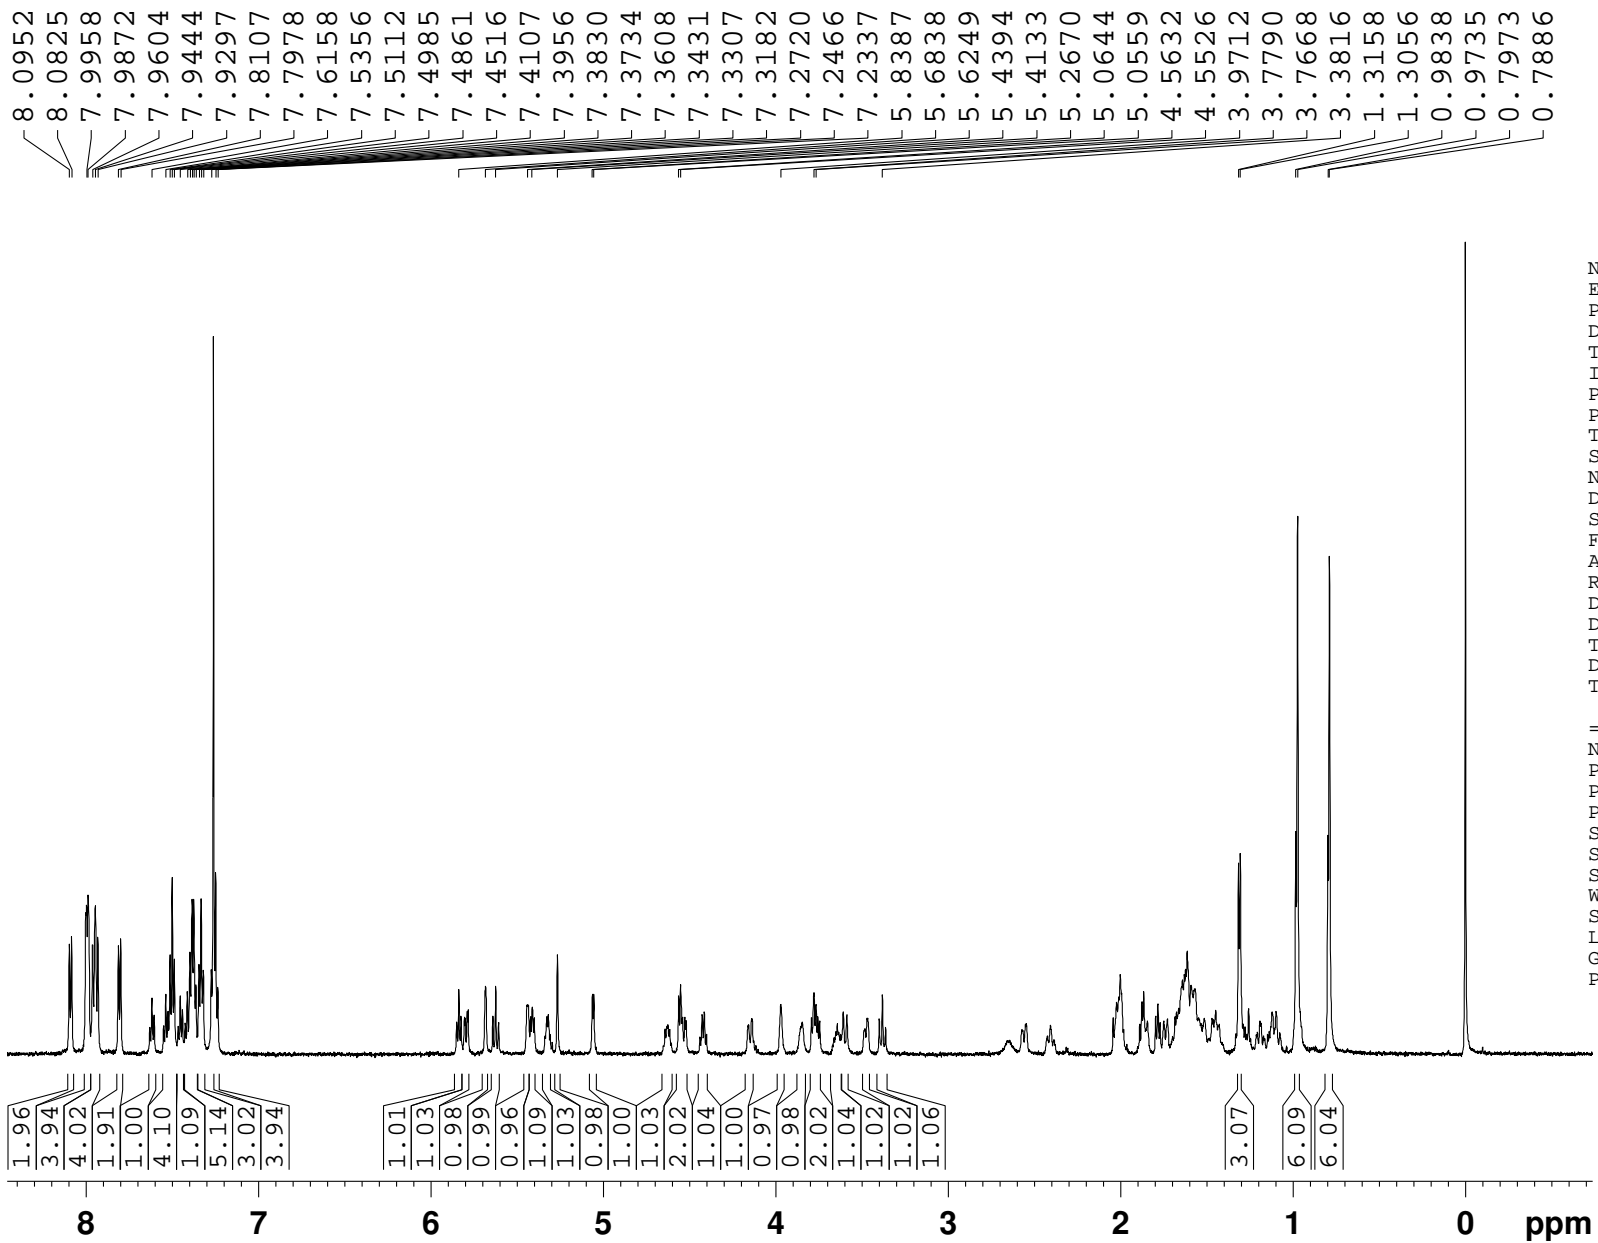

NAME ZP20101111A  
EXPNO 1  
PROCNO 1  
Date\_ 20101111  
Time 10.36  
INSTRUM spect  
PROBHD 5 mm PABBO BB-  
PULPROG zg30  
TD 65536  
SOLVENT CDCl3  
NS 1  
DS 2  
SWH 17985.611 Hz  
FIDRES 0.274439 Hz  
AQ 1.8219786 sec  
RG 362  
DW 27.800 usec  
DE 6.50 usec  
TE 298.2 K  
D1 1.00000000 sec  
TD0 1

===== CHANNEL f1 =====  
NUC1 1H  
P1 11.10 usec  
PL1 -4.00 dB  
PL1W 34.70265579 W  
SF01 600.1324005 MHz  
SI 32768  
SF 600.1300103 MHz  
WDW EM  
SSB 0  
LB 0.30 Hz  
GB 0  
PC 1.00

13C NMR of Compound 10

AV-600-13C

165.77  
165.55  
165.46  
165.33  
140.32  
133.39  
133.31  
133.20  
133.00  
129.91  
129.79  
129.71  
129.60  
129.43  
129.33  
129.19  
129.05  
128.89  
128.55  
128.51  
128.44  
128.40  
128.36  
128.23  
121.97  
109.29  
101.83  
99.70  
97.55  
80.82  
78.79  
75.79  
73.09  
72.00  
71.22  
70.65  
70.12  
69.27  
66.87  
66.63  
62.13  
61.73  
56.48  
50.06  
41.63  
40.29  
39.74  
38.79  
37.24  
36.90  
32.16  
31.91  
31.51  
31.42  
30.31  
29.87  
28.83  
20.83  
19.35  
17.55  
17.15  
16.30  
14.54



NAME ZP20101111A  
EXPNO 2  
PROCNO 1  
Date\_ 20101112  
Time 19.05  
INSTRUM spect  
PROBHD 5 mm PABBO BB-  
PULPROG zgpg30  
TD 65536  
SOLVENT CDCl3  
NS 2060  
DS 2  
SWH 45454.547 Hz  
FIDRES 0.693581 Hz  
AQ 0.7209570 sec  
RG 20600  
DW 11.000 usec  
DE 6.50 usec  
TE 298.2 K  
D1 2.00000000 sec  
D11 0.03000000 sec  
TD0 1

==== CHANNEL f1 =====  
NUC1 13C  
P1 8.80 usec  
PL1 1.00 dB  
PL1W 83.20243835 W  
SFO1 150.9178993 MHz

==== CHANNEL f2 =====  
CPDPRG2 waltz16  
NUC2 1H  
PCPD2 80.00 usec  
PL2 -4.00 dB  
PL12 13.16 dB  
PL13 16.00 dB  
PL2W 34.70265579 W  
PL12W 0.66736388 W  
PL13W 0.34702653 W  
SFO2 600.1324005 MHz  
SI 32768  
SF 150.9028075 MHz  
WDW EM  
SSB 0  
LB 3.00 Hz  
GB 0  
PC 1.40

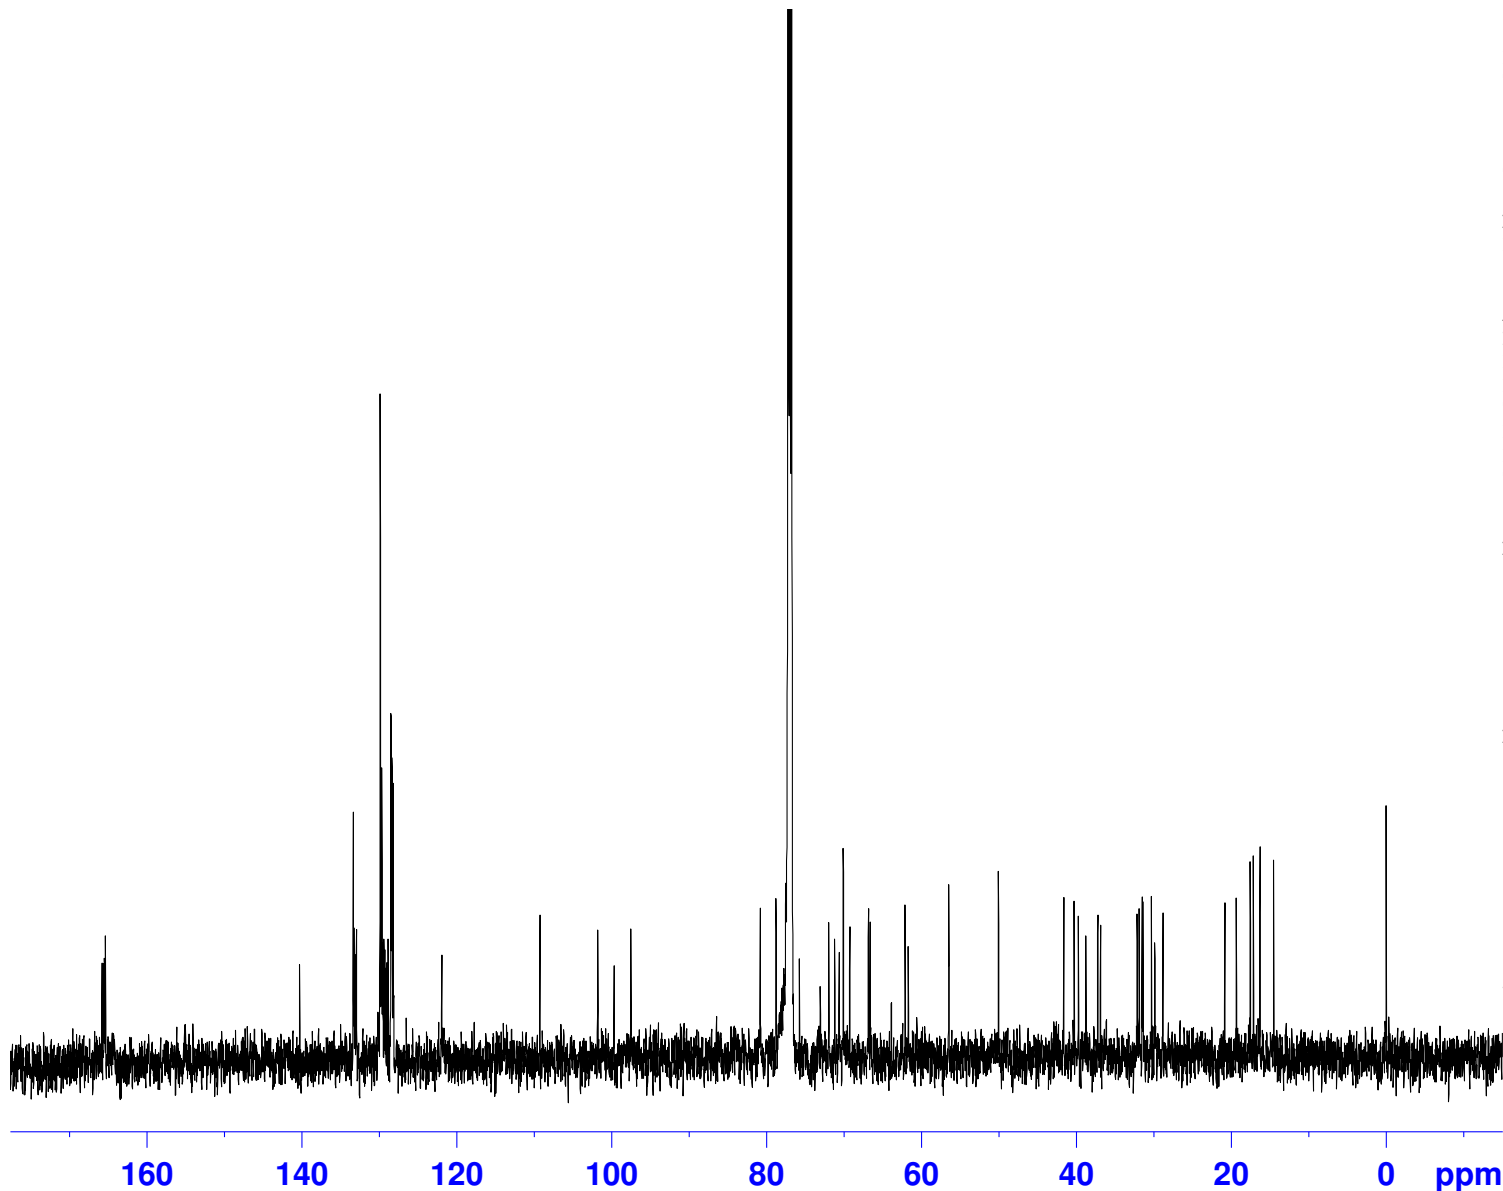

AV-600-1H

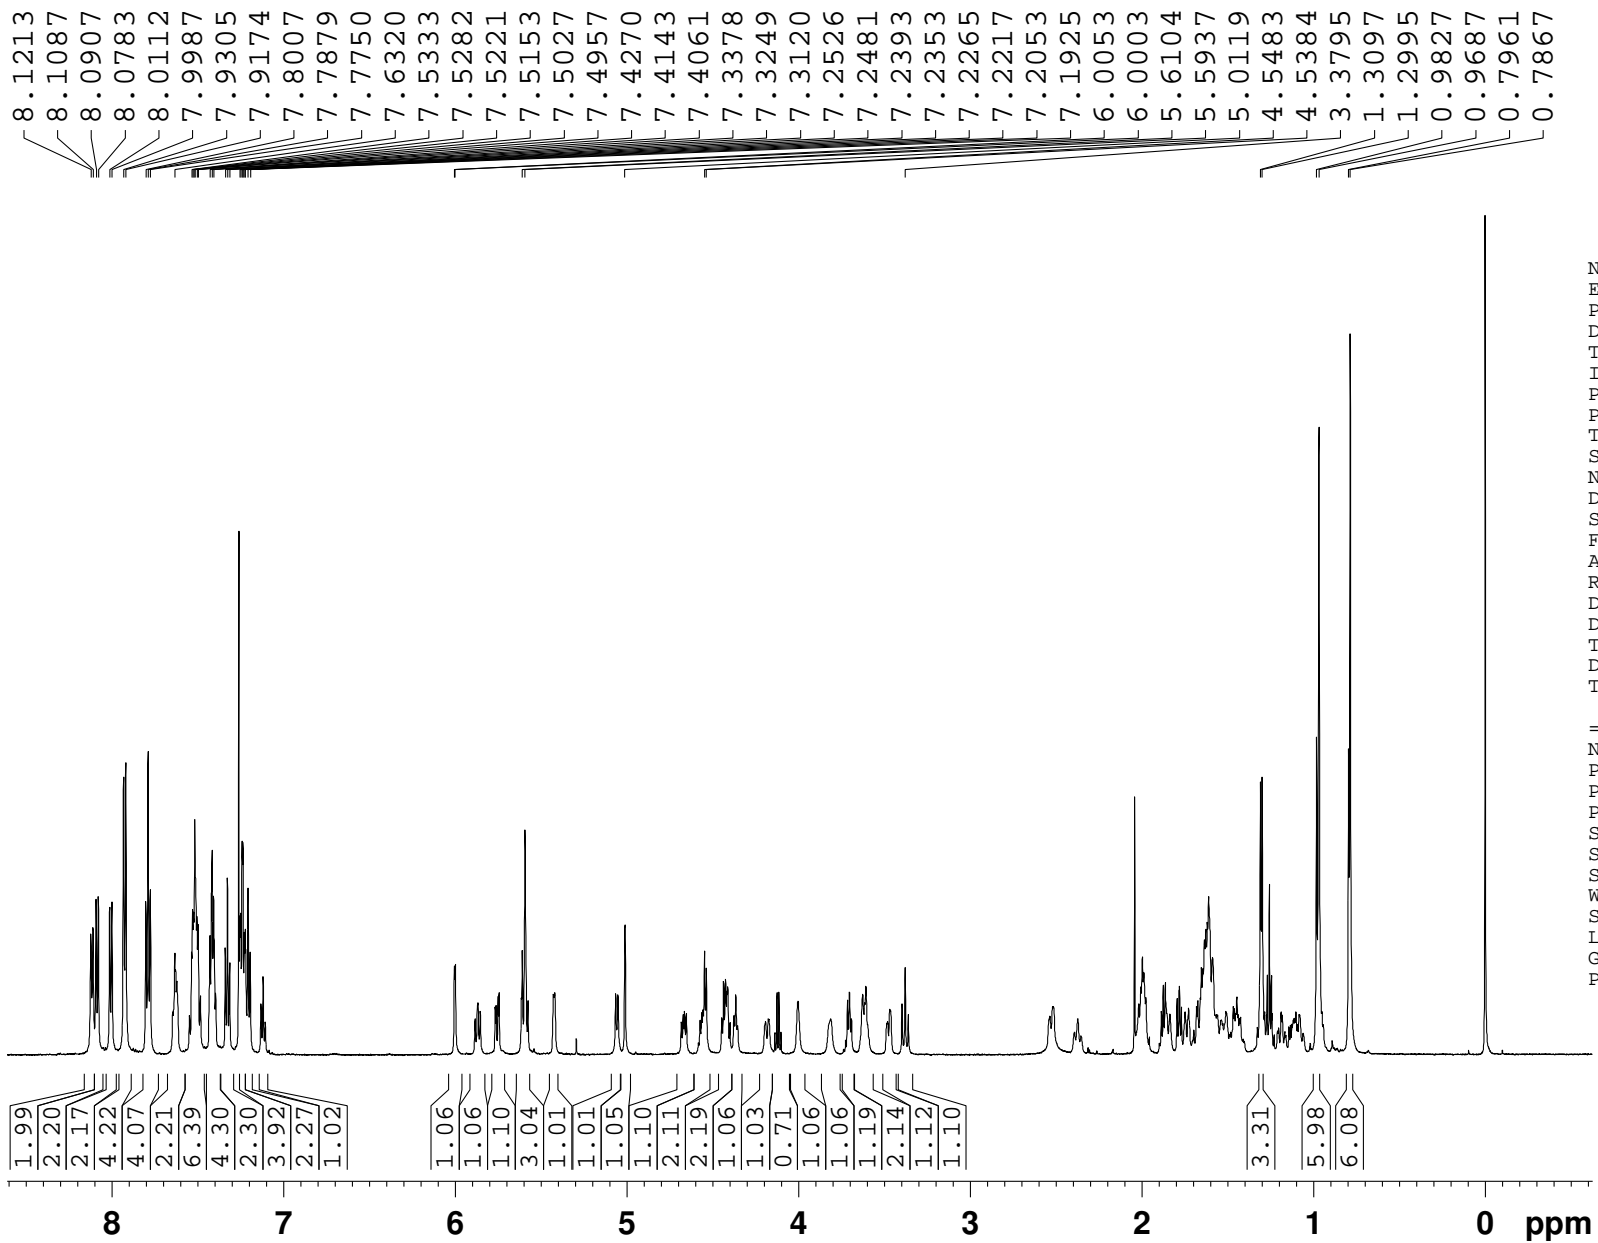

NAME ZP20101123  
EXPNO 1  
PROCNO 1  
Date\_ 20101124  
Time 9.37  
INSTRUM spect  
PROBHD 5 mm PABBO BB-  
PULPROG zg30  
TD 65536  
SOLVENT CDCl3  
NS 8  
DS 2  
SWH 17985.611 Hz  
FIDRES 0.274439 Hz  
AQ 1.8219786 sec  
RG 228  
DW 27.800 usec  
DE 6.50 usec  
TE 298.2 K  
D1 1.00000000 sec  
TD0 1

==== CHANNEL f1 =====  
NUC1 1H  
P1 11.10 usec  
PL1 -4.00 dB  
PL1W 34.70265579 W  
SF01 600.1324005 MHz  
SI 32768  
SF 600.1300104 MHz  
WDW EM  
SSB 0  
LB 0.30 Hz  
GB 0  
PC 1.00

<sup>13</sup>C NMR of Compound 11

AV-600-13C

Sample: ZP20101123

165.780  
165.611  
165.515  
165.211  
140.281  
133.611  
133.444  
133.277  
133.022  
130.144  
129.922  
129.811  
129.766  
129.688  
129.588  
129.391  
129.271  
128.951  
128.831  
128.666  
128.571  
128.461  
128.391  
128.351  
128.281  
128.241  
121.961  
109.281  
103.041  
97.401  
80.811  
78.861  
78.141  
75.331  
71.911  
71.721  
71.531  
70.651  
70.031  
69.901  
67.981  
66.851  
66.581  
62.121  
61.921  
56.471  
50.061  
41.621  
40.281  
39.731  
38.721  
37.221  
36.881  
32.141  
31.891  
31.491  
31.411  
30.301  
29.781  
28.821  
20.821  
19.321  
17.521  
17.141  
16.291  
14.531

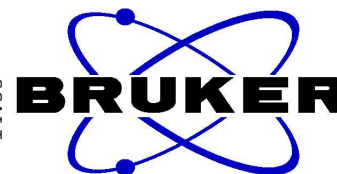

NAME ZP20101123  
EXPNO 2  
PROCNO 1  
Date\_ 20101124  
Time 9.54  
INSTRUM spect  
PROBHD 5 mm PABBO BB-  
PULPROG zgpg30  
TD 65536  
SOLVENT CDCl3  
NS 1276  
DS 2  
SWH 45454.547 Hz  
FIDRES 0.693581 Hz  
AQ 0.7209570 sec  
RG 23100  
DW 11.000 usec  
DE 6.50 usec  
TE 298.2 K  
D1 2.00000000 sec  
D11 0.03000000 sec  
TD0 1

==== CHANNEL f1 =====  
NUC1 13C  
P1 8.80 usec  
PL1 1.00 dB  
PL1W 83.20243835 W  
SFO1 150.9178993 MHz

==== CHANNEL f2 =====  
CPDPRG2 waltz16  
NUC2 1H  
PCPD2 80.00 usec  
PL2 -4.00 dB  
PL12 13.16 dB  
PL13 16.00 dB  
PL2W 34.70265579 W  
PL12W 0.66736388 W  
PL13W 0.34702653 W  
SFO2 600.1324005 MHz  
SI 32768  
SF 150.9028090 MHz  
WDW EM  
SSB 0  
LB 3.00 Hz  
GB 0  
PC 1.40

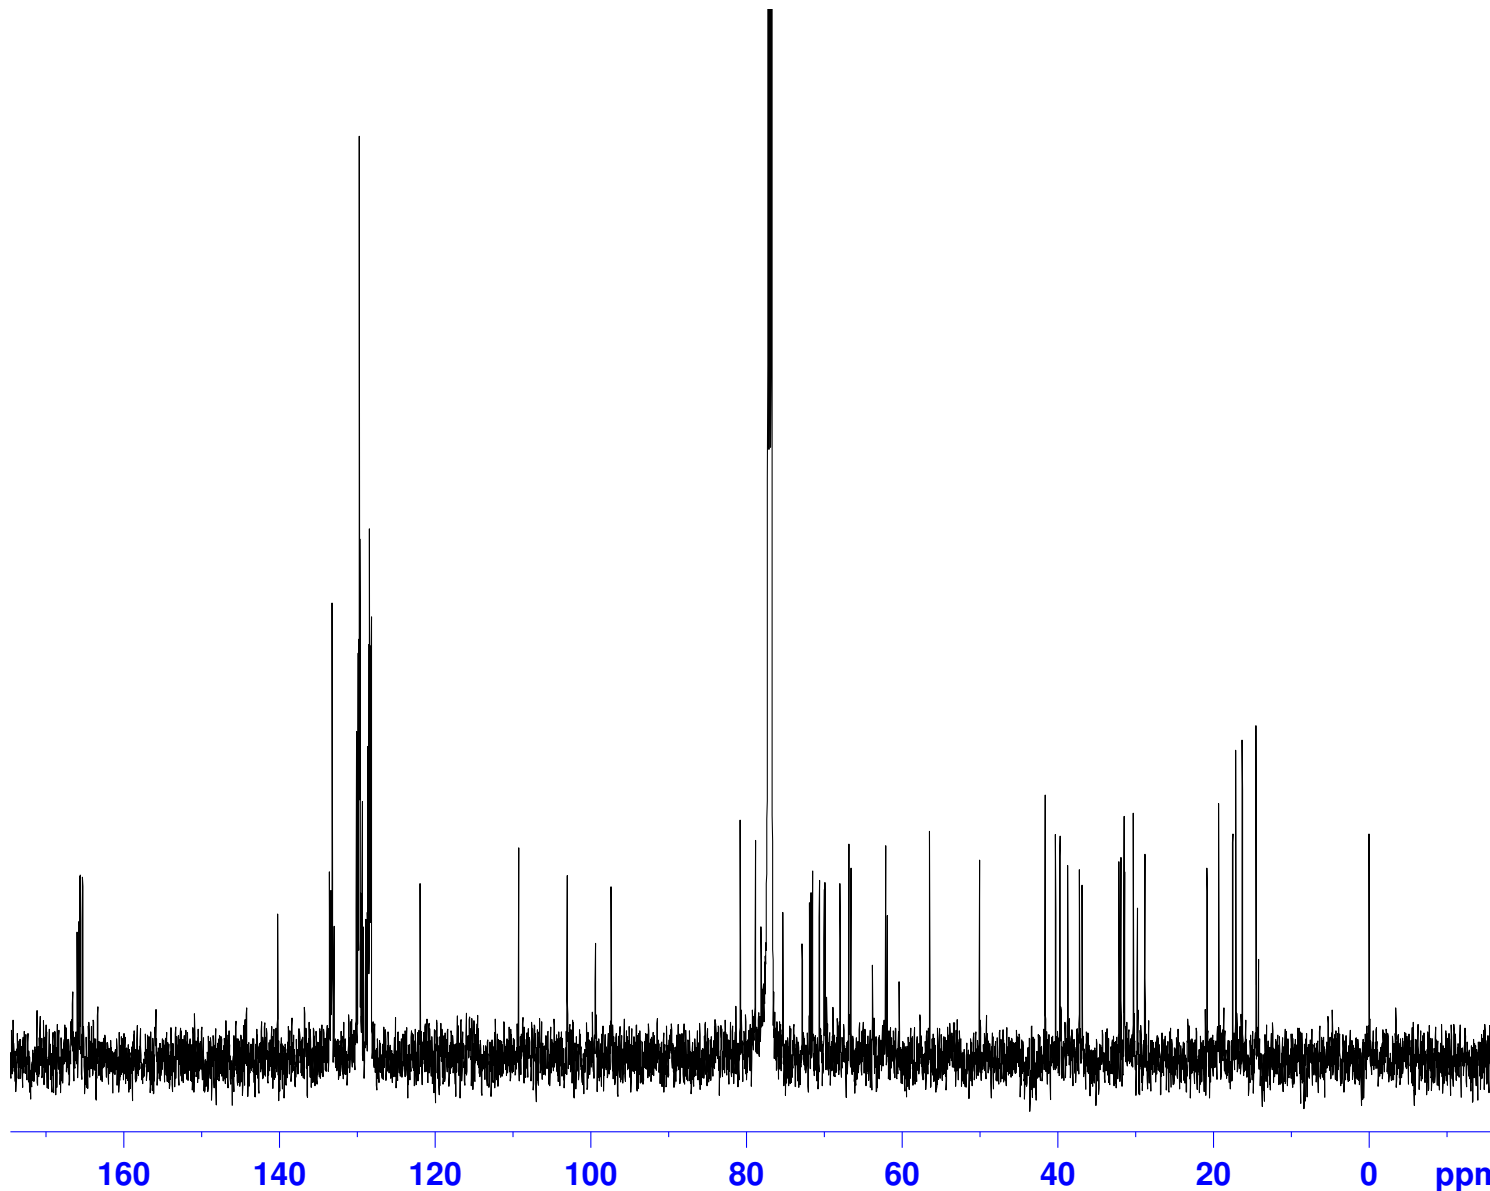

1H NMR of Compound 12

AV-600-1H

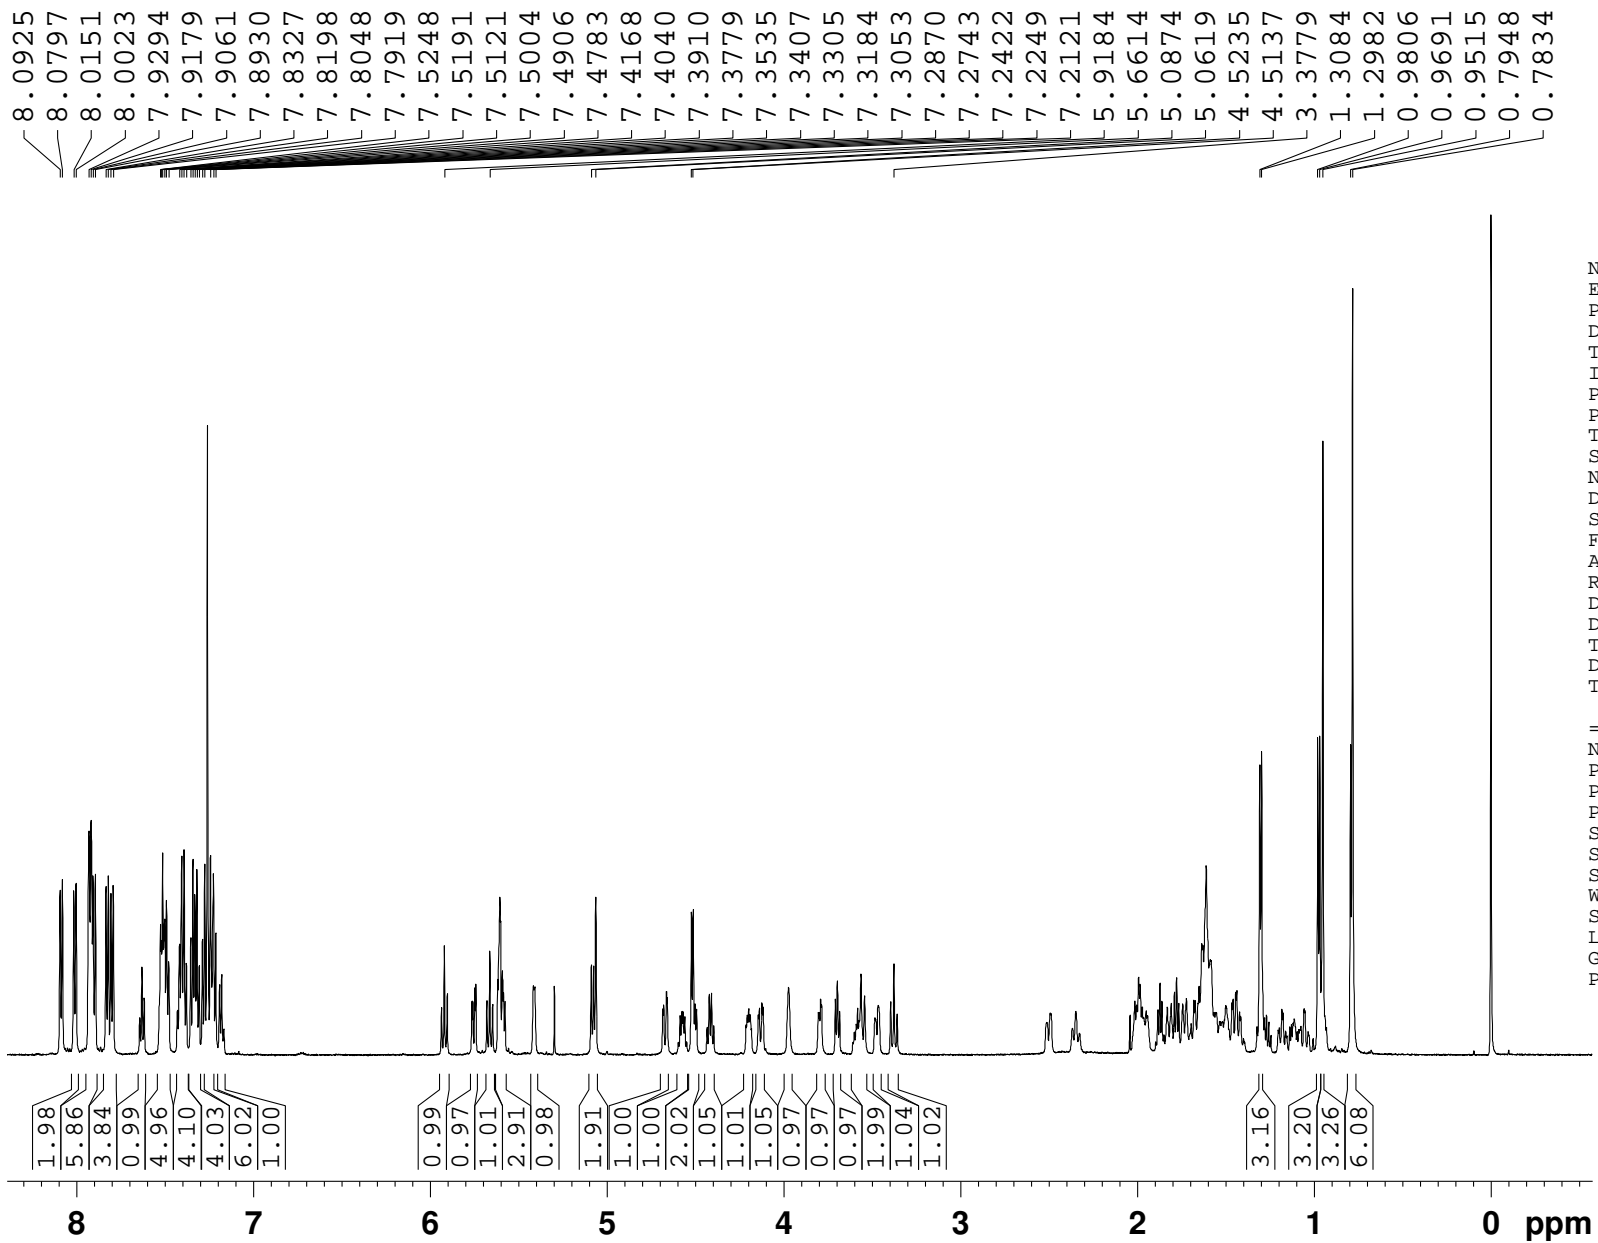

NAME ZP20101105  
EXPNO 1  
PROCNO 1  
Date\_ 20101105  
Time 15.07  
INSTRUM spect  
PROBHD 5 mm PABBO BB-  
PULPROG zg30  
TD 65536  
SOLVENT CDCl3  
NS 8  
DS 2  
SWH 17985.611 Hz  
FIDRES 0.274439 Hz  
AQ 1.8219786 sec  
RG 228  
DW 27.800 usec  
DE 6.50 usec  
TE 298.2 K  
D1 1.00000000 sec  
TD0 1

===== CHANNEL f1 =====  
NUC1 1H  
P1 11.10 usec  
PL1 -4.00 dB  
PL1W 34.70265579 W  
SF01 600.1324005 MHz  
SI 32768  
SF 600.1300104 MHz  
WDW EM  
SSB 0  
LB 0.30 Hz  
GB 0  
PC 1.00

<sup>13</sup>C NMR of Compound 12

AV-600-13C

Sample: n-gram

166.01  
165.78  
165.51  
165.30  
165.17  
140.37  
133.46  
133.28  
133.14  
133.02  
129.94  
129.86  
129.79  
129.70  
129.56  
129.40  
129.30  
128.76  
128.57  
128.39  
128.30  
128.24  
121.88  
109.29  
102.51  
99.35  
97.42  
80.82  
78.61  
77.93  
75.41  
72.76  
72.42  
72.13  
71.92  
70.66  
70.09  
69.66  
66.86  
66.58  
63.06  
62.13  
56.48  
50.06  
41.63  
40.29  
39.74  
38.71  
37.22  
36.88  
32.15  
31.90  
31.50  
31.42  
30.31  
29.74  
28.82  
20.81  
19.32  
17.50  
17.15  
16.29  
14.53



NAME ZP201011105  
EXPNO 2  
PROCNO 1  
Date\_ 20101105  
Time 15.36  
INSTRUM spect  
PROBHD 5 mm PABBO BB-  
PULPROG zgpg30  
TD 65536  
SOLVENT CDCl3  
NS 1164  
DS 2  
SWH 45454.547 Hz  
FIDRES 0.693581 Hz  
AQ 0.7209570 sec  
RG 26000  
DW 11.000 usec  
DE 6.50 usec  
TE 298.2 K  
D1 2.00000000 sec  
D11 0.03000000 sec  
TD0 1

==== CHANNEL f1 =====  
NUC1 13C  
P1 8.80 usec  
PL1 1.00 dB  
PL1W 83.20243835 W  
SFO1 150.9178993 MHz

==== CHANNEL f2 =====  
CPDPRG2 waltz16  
NUC2 1H  
PCPD2 80.00 usec  
PL2 -4.00 dB  
PL12 13.16 dB  
PL13 16.00 dB  
PL2W 34.70265579 W  
PL12W 0.66736388 W  
PL13W 0.34702653 W  
SFO2 600.1324005 MHz  
SI 32768  
SF 150.9028075 MHz  
WDW EM  
SSB 0  
LB 3.00 Hz  
GB 0  
PC 1.40

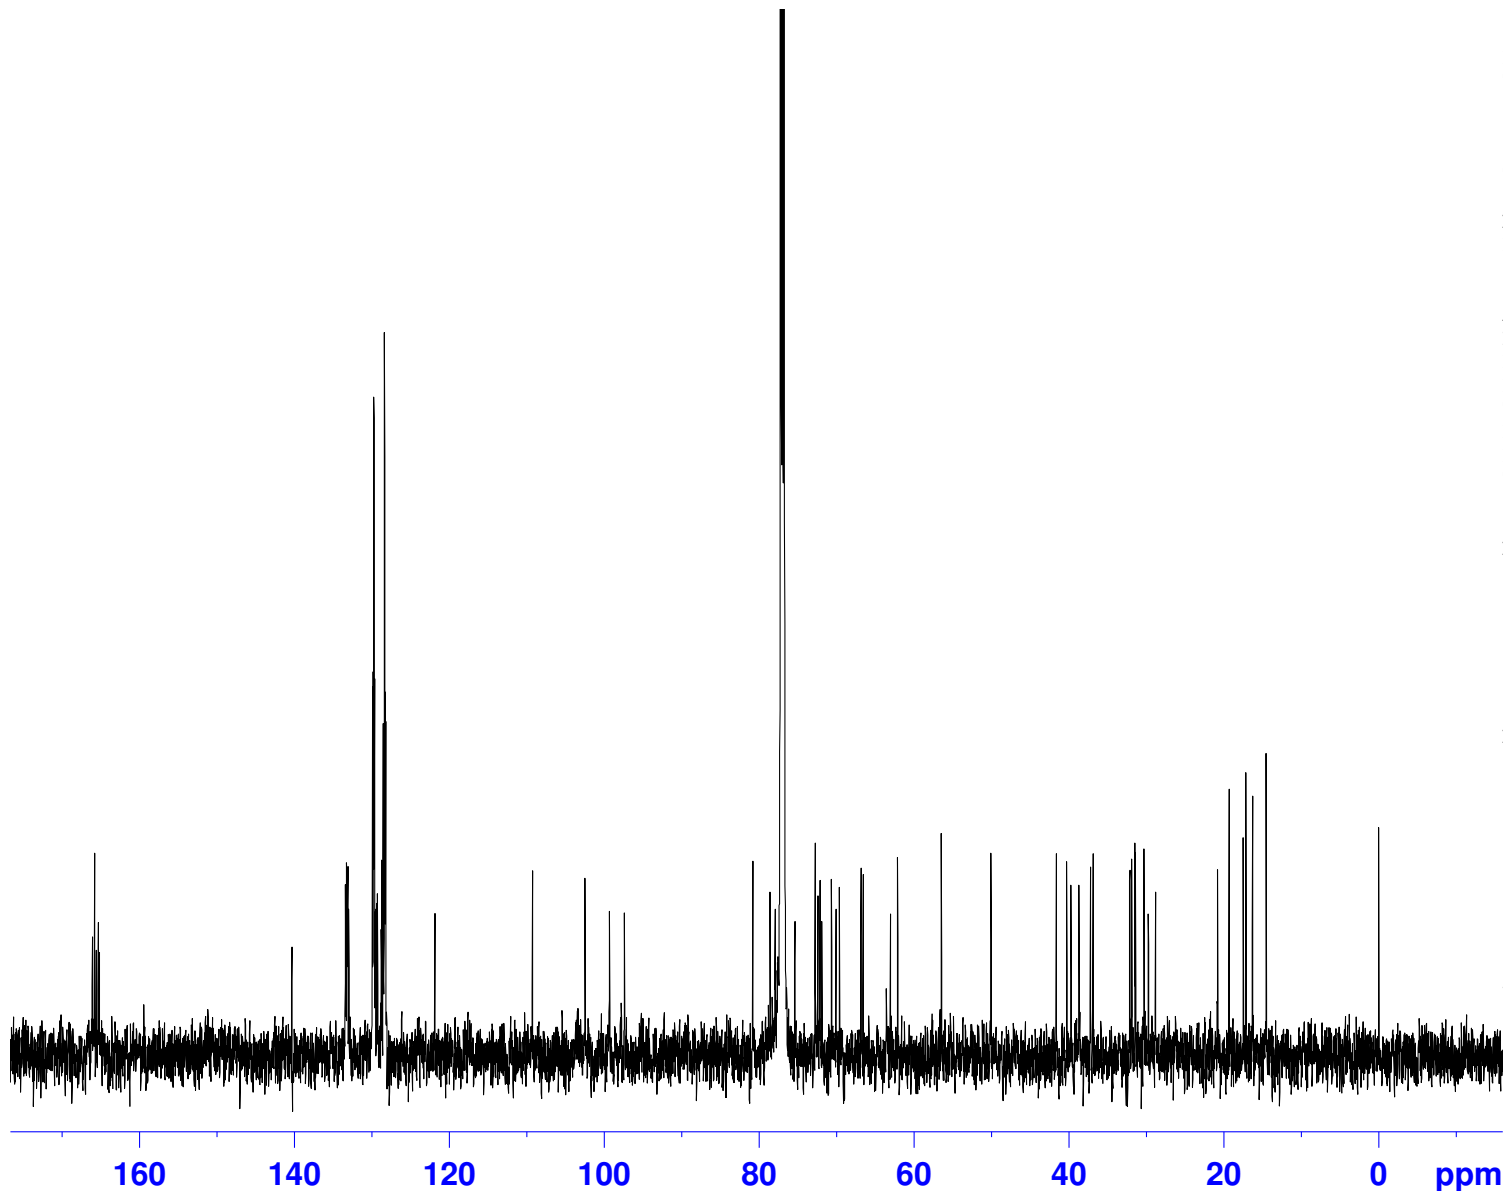

<sup>1</sup>H NMR of Compound 13

AV-600-1H

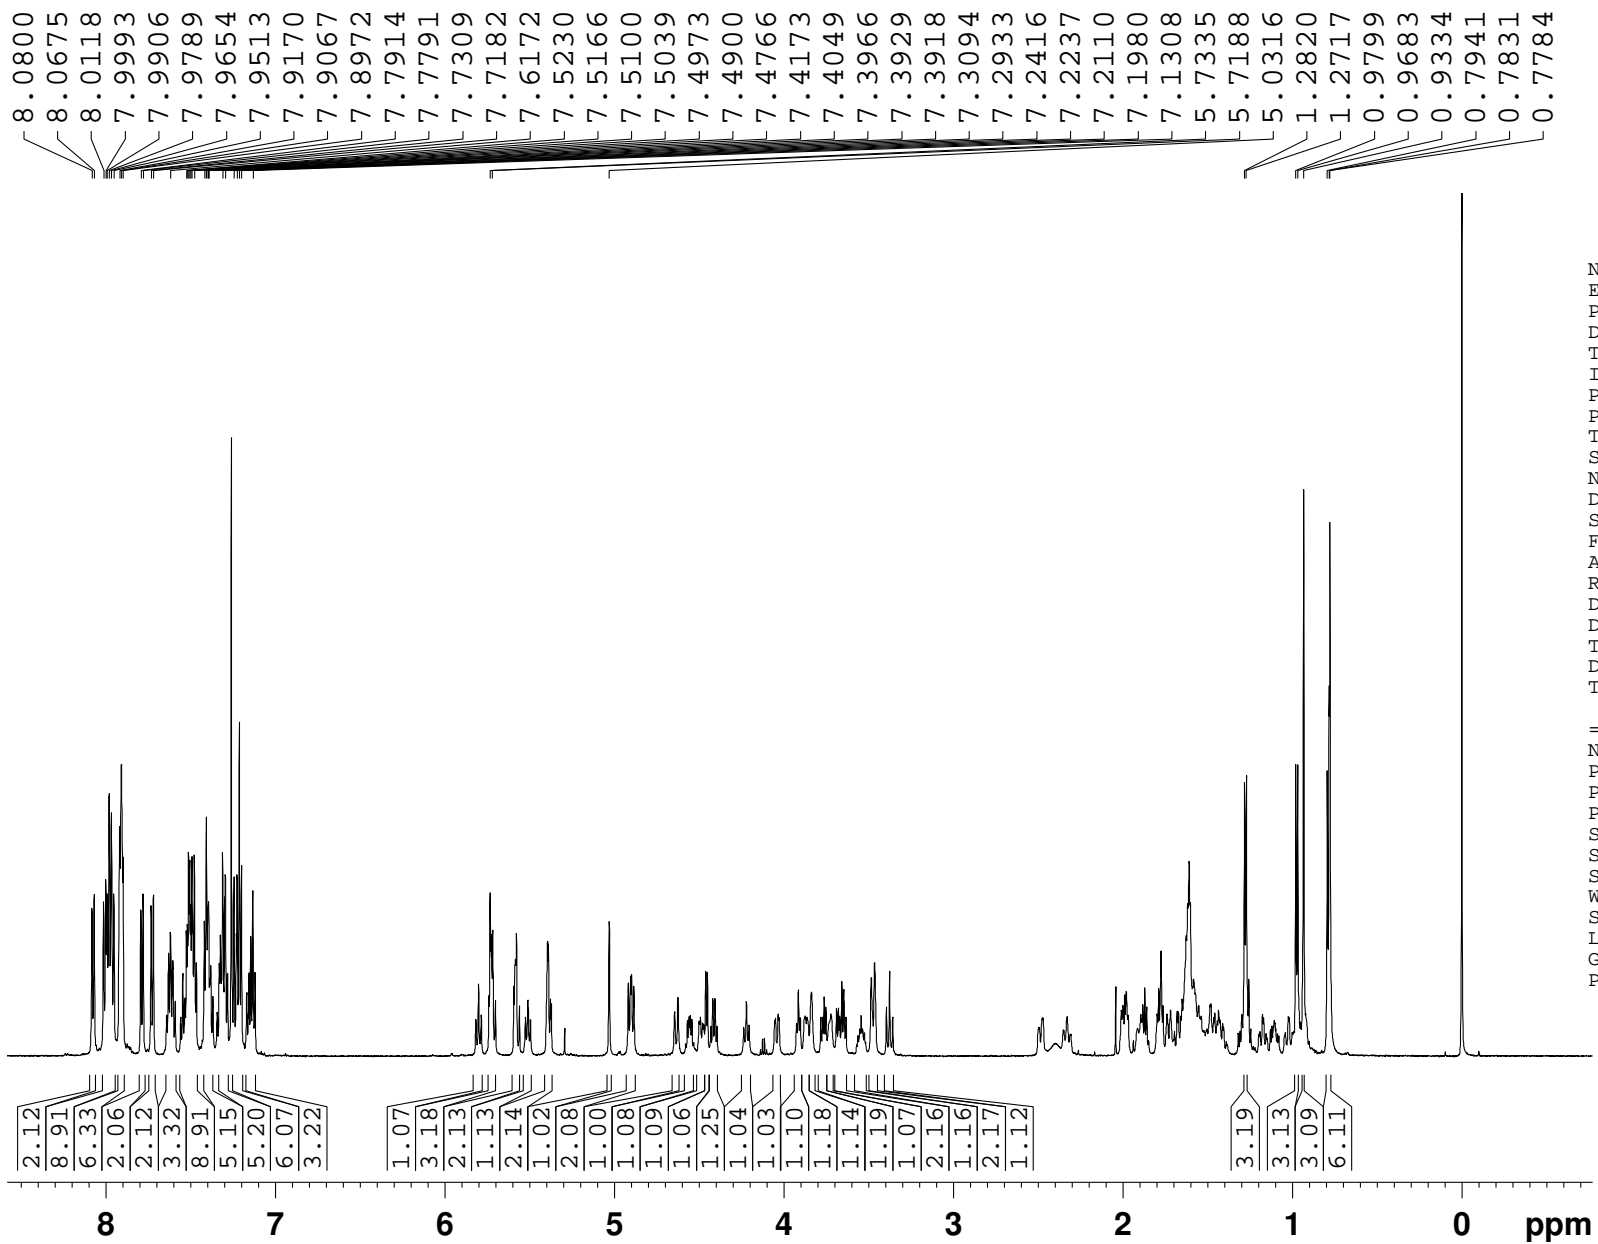

NAME ZP20101117A  
EXPNO 1  
PROCNO 1  
Date\_ 20101117  
Time 15.10  
INSTRUM spect  
PROBHD 5 mm PABBO BB-  
PULPROG zg30  
TD 65536  
SOLVENT CDCl3  
NS 8  
DS 2  
SWH 17985.611 Hz  
FIDRES 0.274439 Hz  
AQ 1.8219786 sec  
RG 228  
DW 27.800 usec  
DE 6.50 usec  
TE 298.2 K  
D1 1.00000000 sec  
TD0 1

==== CHANNEL f1 =====  
NUC1 1H  
P1 11.10 usec  
PL1 -4.00 dB  
PL1W 34.70265579 W  
SF01 600.1324005 MHz  
SI 32768  
SF 600.1300107 MHz  
WDW EM  
SSB 0  
LB 0.30 Hz  
GB 0  
PC 1.00



<sup>13</sup>C NMR of Compound 13

AV-600-13C

165.580  
165.442  
165.344  
165.211  
164.770  
133.544  
133.42  
133.35  
133.24  
133.17  
130.00  
129.92  
129.76  
129.68  
129.63  
129.50  
129.41  
128.86  
128.82  
128.68  
128.56  
128.50  
128.38  
128.33  
128.23  
121.87  
109.28  
102.50  
100.99  
99.44  
97.36  
80.81  
78.66  
73.22  
72.72  
72.72  
71.94  
71.79  
71.50  
70.59  
70.06  
69.90  
67.58  
66.85  
66.49  
62.12  
56.47  
50.04  
41.62  
40.27  
39.73  
38.70  
37.18  
36.84  
32.13  
31.89  
31.48  
31.41  
30.30  
29.73  
28.82  
20.80  
19.29  
17.47  
17.14  
16.28  
14.53

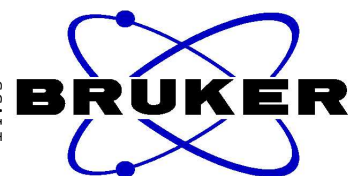

NAME ZP20101117A  
EXPNO 2  
PROCNO 1  
Date\_ 20101122  
Time 9.08  
INSTRUM spect  
PROBHD 5 mm PABBO BB-  
PULPROG zgpg30  
TD 65536  
SOLVENT CDCl3  
NS 1372  
DS 2  
SWH 45454.547 Hz  
FIDRES 0.693581 Hz  
AQ 0.7209570 sec  
RG 23100  
DW 11.000 usec  
DE 6.50 usec  
TE 298.2 K  
D1 2.00000000 sec  
D11 0.03000000 sec  
TD0 1

==== CHANNEL f1 =====  
NUC1 13C  
P1 8.80 usec  
PL1 1.00 dB  
PL1W 83.20243835 W  
SFO1 150.9178993 MHz

==== CHANNEL f2 =====  
CPDPRG2 waltz16  
NUC2 1H  
PCPD2 80.00 usec  
PL2 -4.00 dB  
PL12 13.16 dB  
PL13 16.00 dB  
PL2W 34.70265579 W  
PL12W 0.66736388 W  
PL13W 0.34702653 W  
SFO2 600.1324005 MHz  
SI 32768  
SF 150.9028090 MHz  
WDW EM  
SSB 0  
LB 3.00 Hz  
GB 0  
PC 1.40

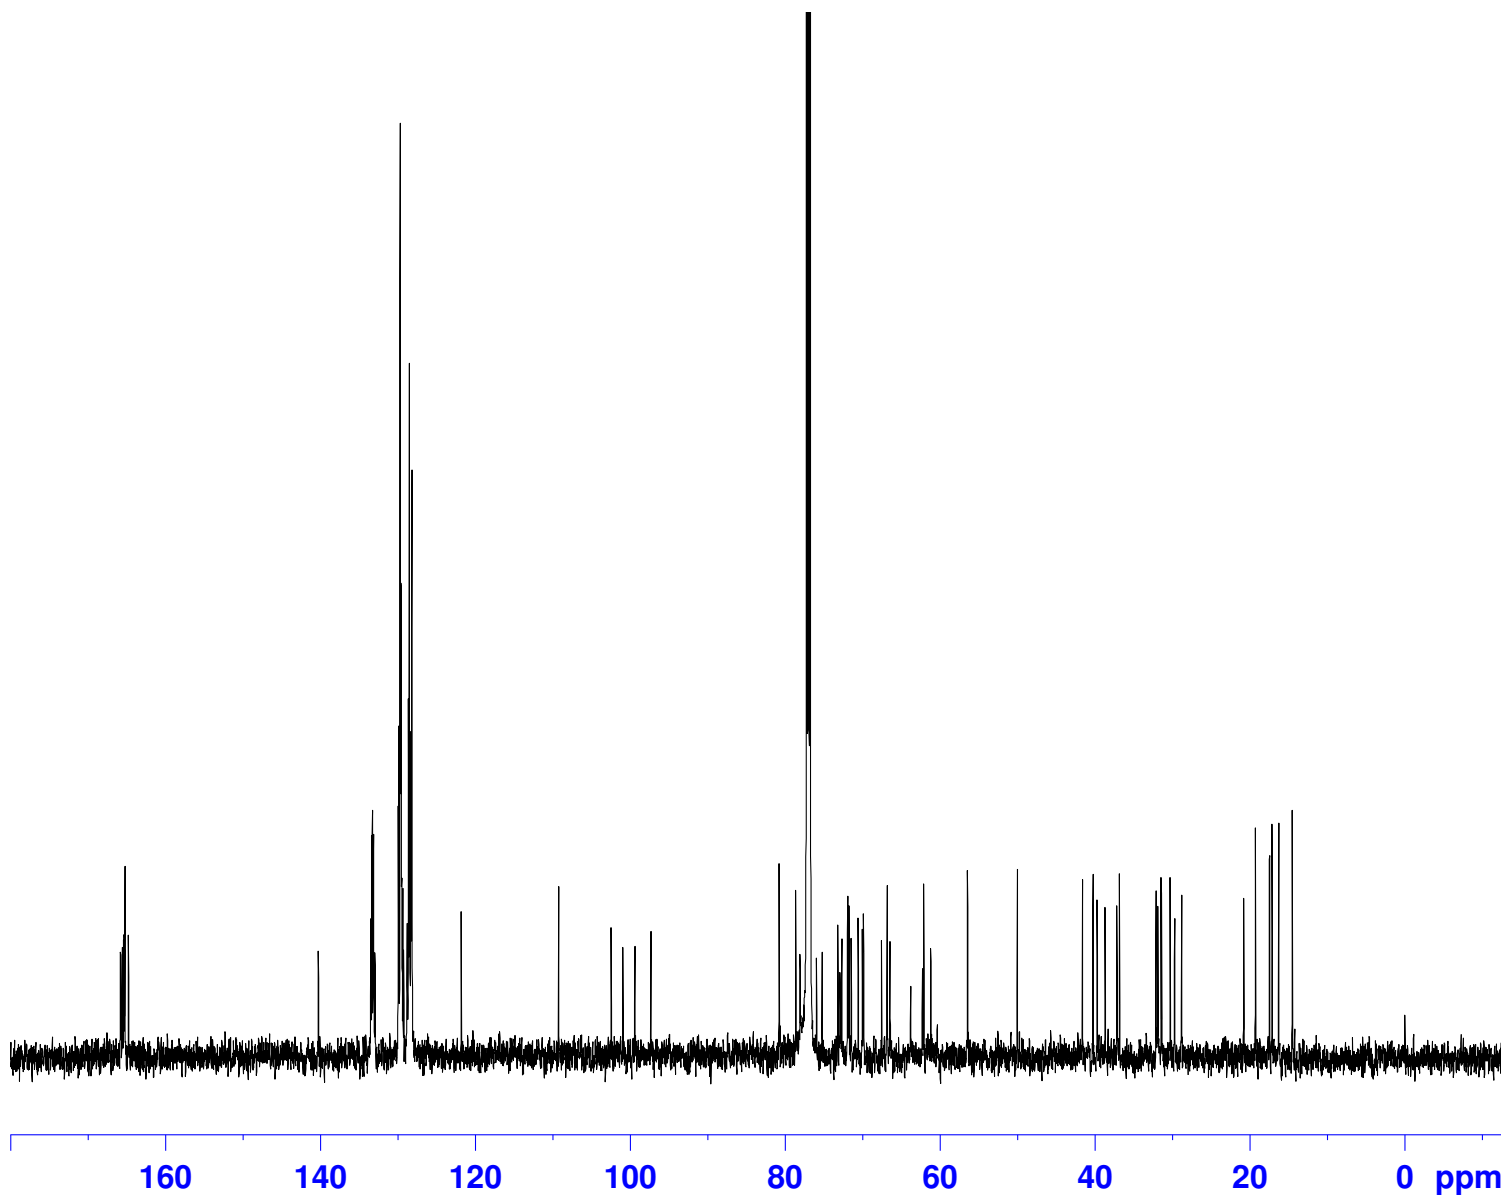

<sup>1</sup>H NMR of Compound 14

AV-600-1H

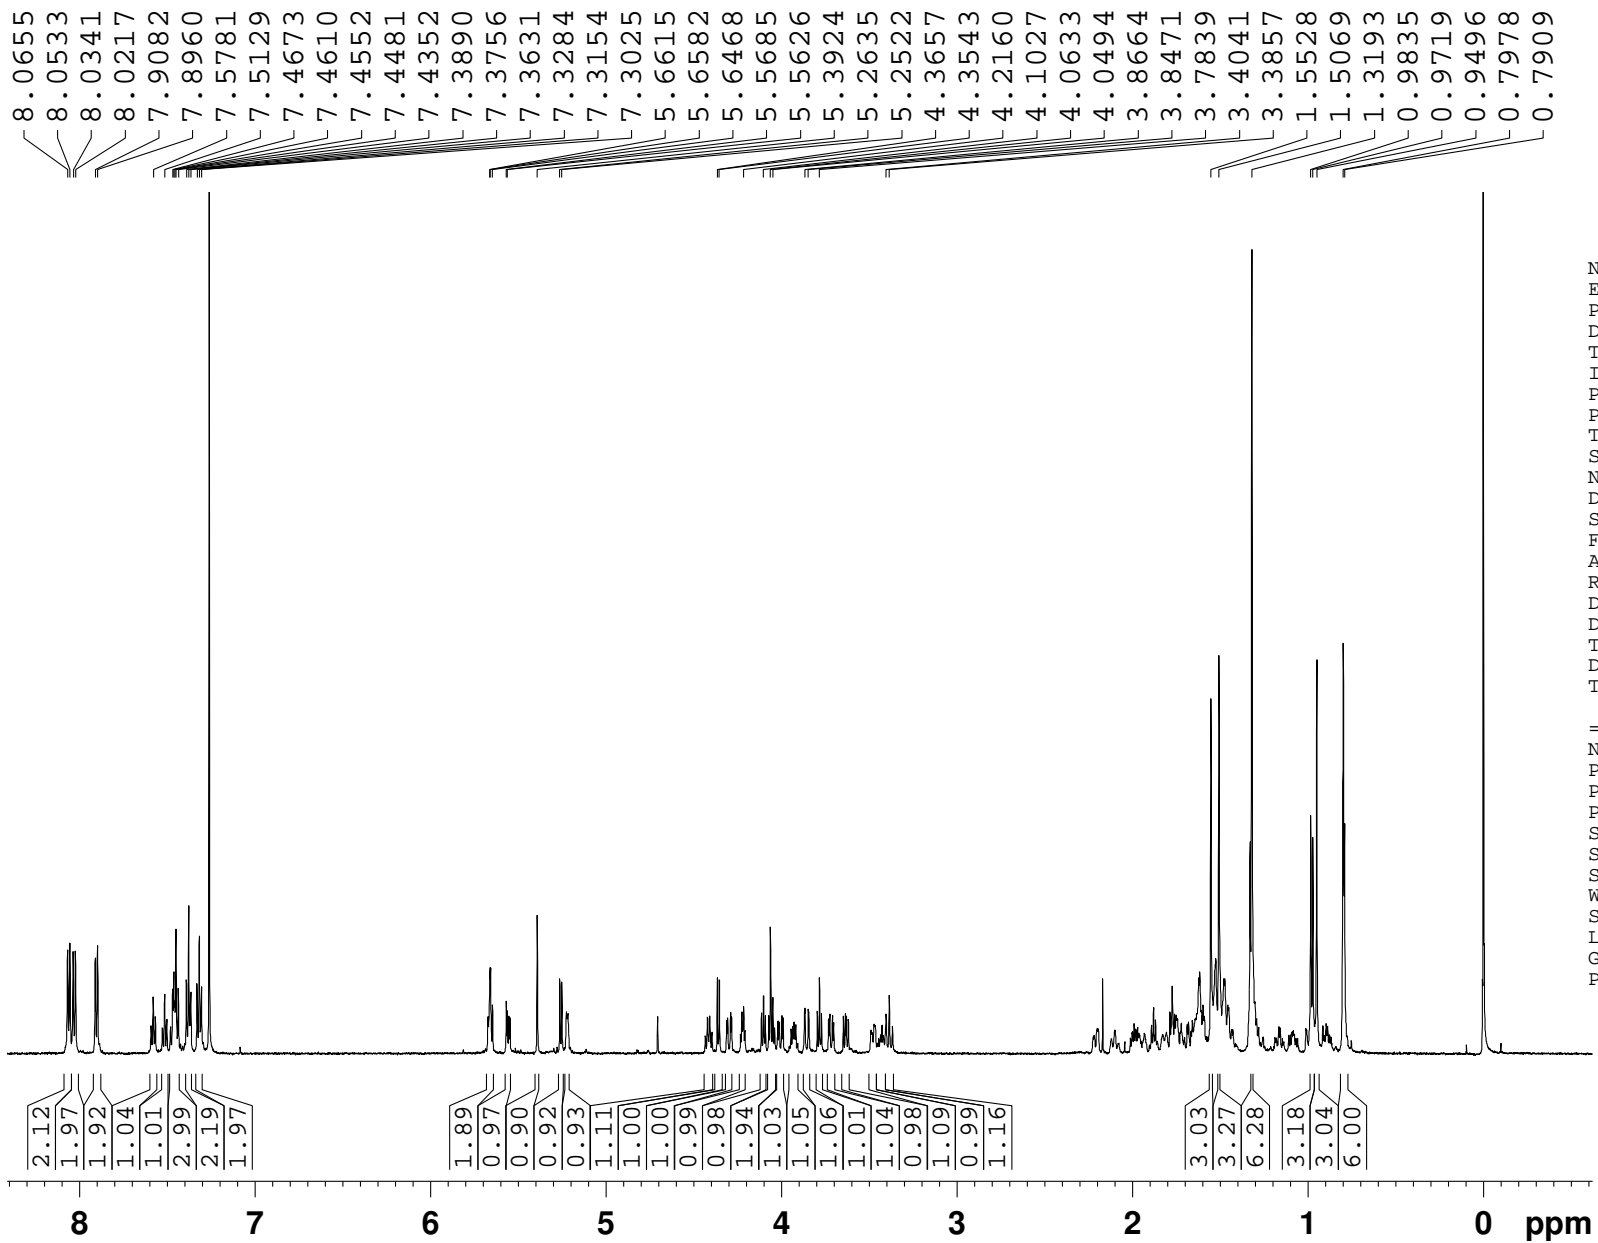

NAME ZP20101201C  
EXPNO 1  
PROCNO 1  
Date\_ 20101201  
Time 14.13  
INSTRUM spect  
PROBHD 5 mm PABBO BB-  
PULPROG zg30  
TD 65536  
SOLVENT CDCl3  
NS 8  
DS 2  
SWH 17985.611 Hz  
FIDRES 0.274439 Hz  
AQ 1.8219786 sec  
RG 228  
DW 27.800 usec  
DE 6.50 usec  
TE 298.2 K  
D1 1.00000000 sec  
TD0 1

===== CHANNEL f1 =====  
NUC1 1H  
P1 11.10 usec  
PL1 -4.00 dB  
PL1W 34.70265579 W  
SF01 600.1324005 MHz  
SI 32768  
SF 600.1300103 MHz  
WDW EM  
SSB 0  
LB 0.30 Hz  
GB 0  
PC 1.00

<sup>13</sup>C NMR of Compound 14

AV-600-13C

Sample:

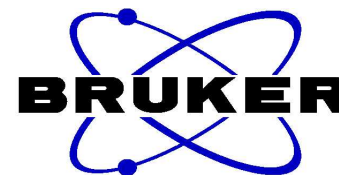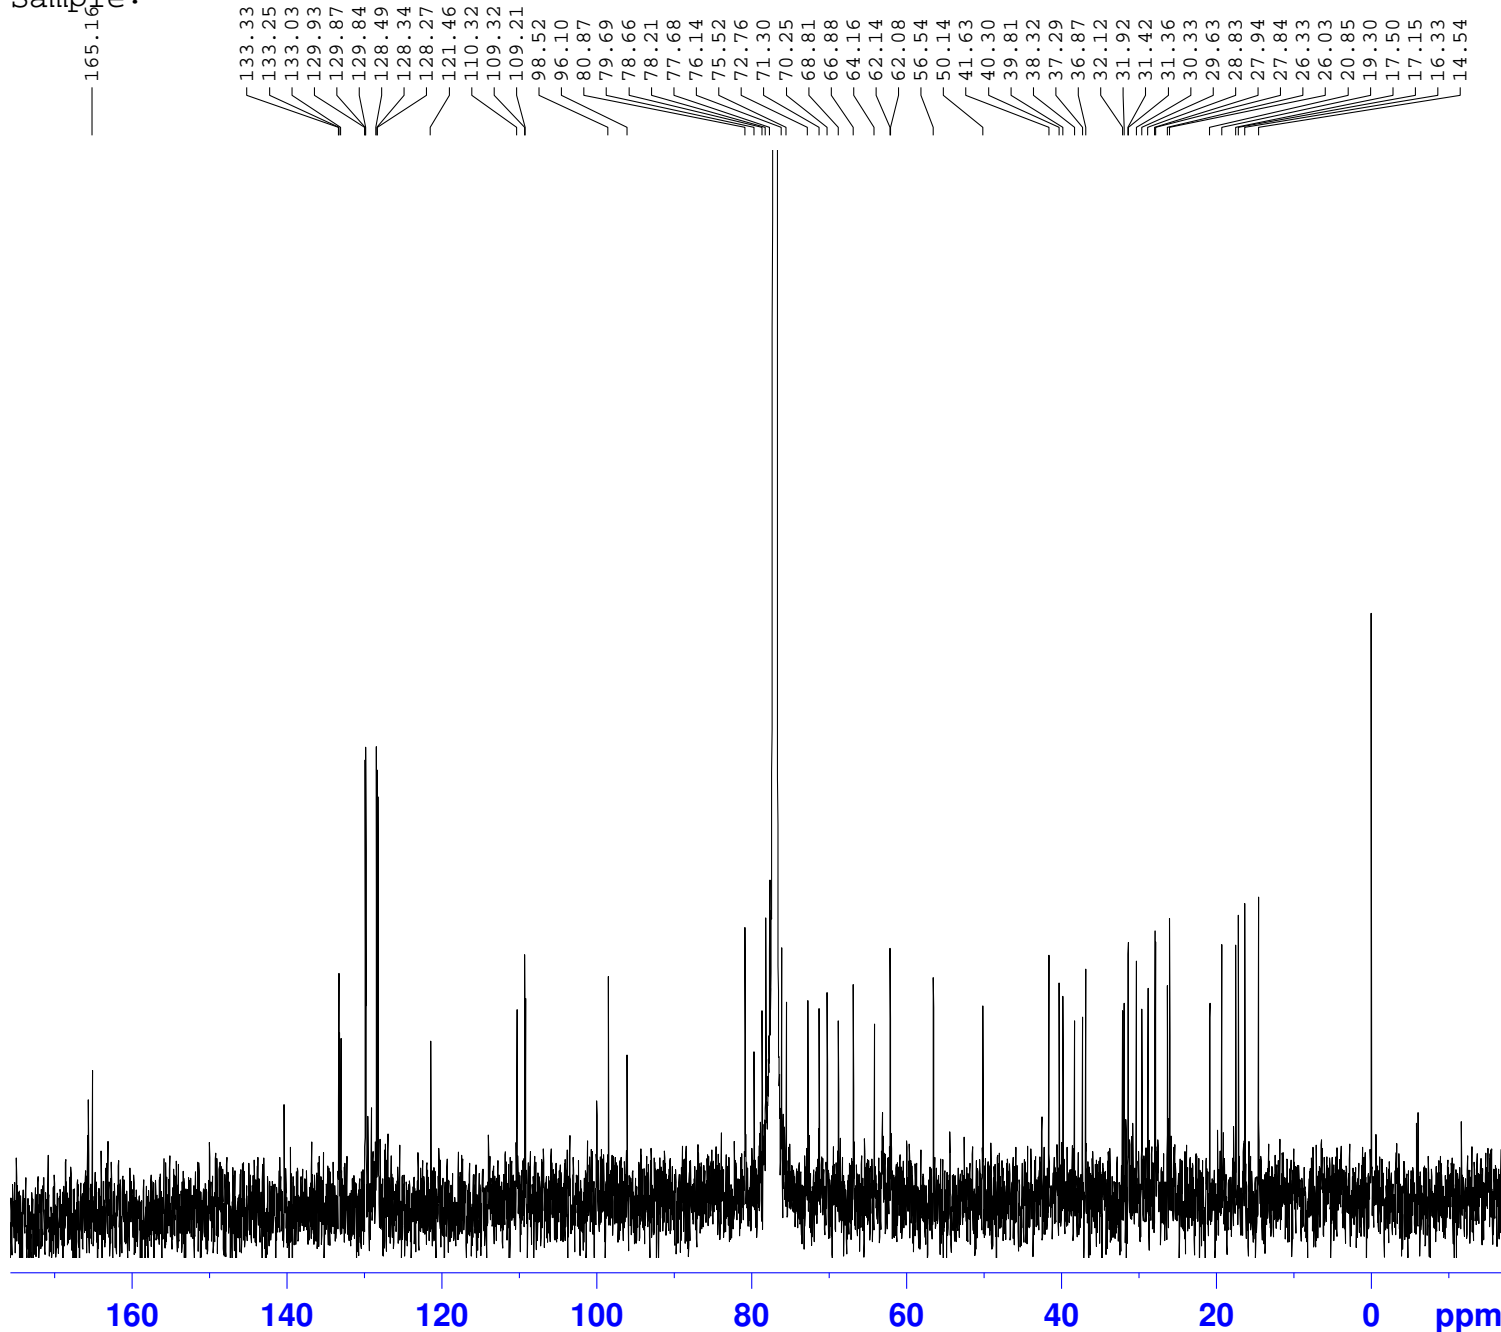

```
NAME          ZP20101201C
EXPNO          2
PROCNO         1
Date_          20101201
Time           14.43
INSTRUM        spect
PROBHD         5 mm PABBO BB-
PULPROG        zgpg30
TD             65536
SOLVENT        CDCl3
NS             4014
DS             2
SWH            45454.547 Hz
FIDRES         0.693581 Hz
AQ            0.7209570 sec
RG            23100
DW            11.000 usec
DE            6.50 usec
TE            298.2 K
D1            2.00000000 sec
D11           0.03000000 sec
TD0           1
```

```
===== CHANNEL f1 =====
NUC1           13C
P1             8.80 usec
PL1            1.00 dB
PL1W          83.20243835 W
SFO1          150.9178993 MHz
```

```
===== CHANNEL f2 =====
CPDPRG2        waltz16
NUC2           1H
PCPD2          80.00 usec
PL2            -4.00 dB
PL12           13.16 dB
PL13           16.00 dB
PL2W          34.70265579 W
PL12W         0.66736388 W
PL13W         0.34702653 W
SFO2          600.1324005 MHz
SI            32768
SF            150.9028067 MHz
WDW            EM
SSB            0
LB            3.00 Hz
GB            0
PC            1.40
```

1H NMR of Compound 15

AV-600-1H

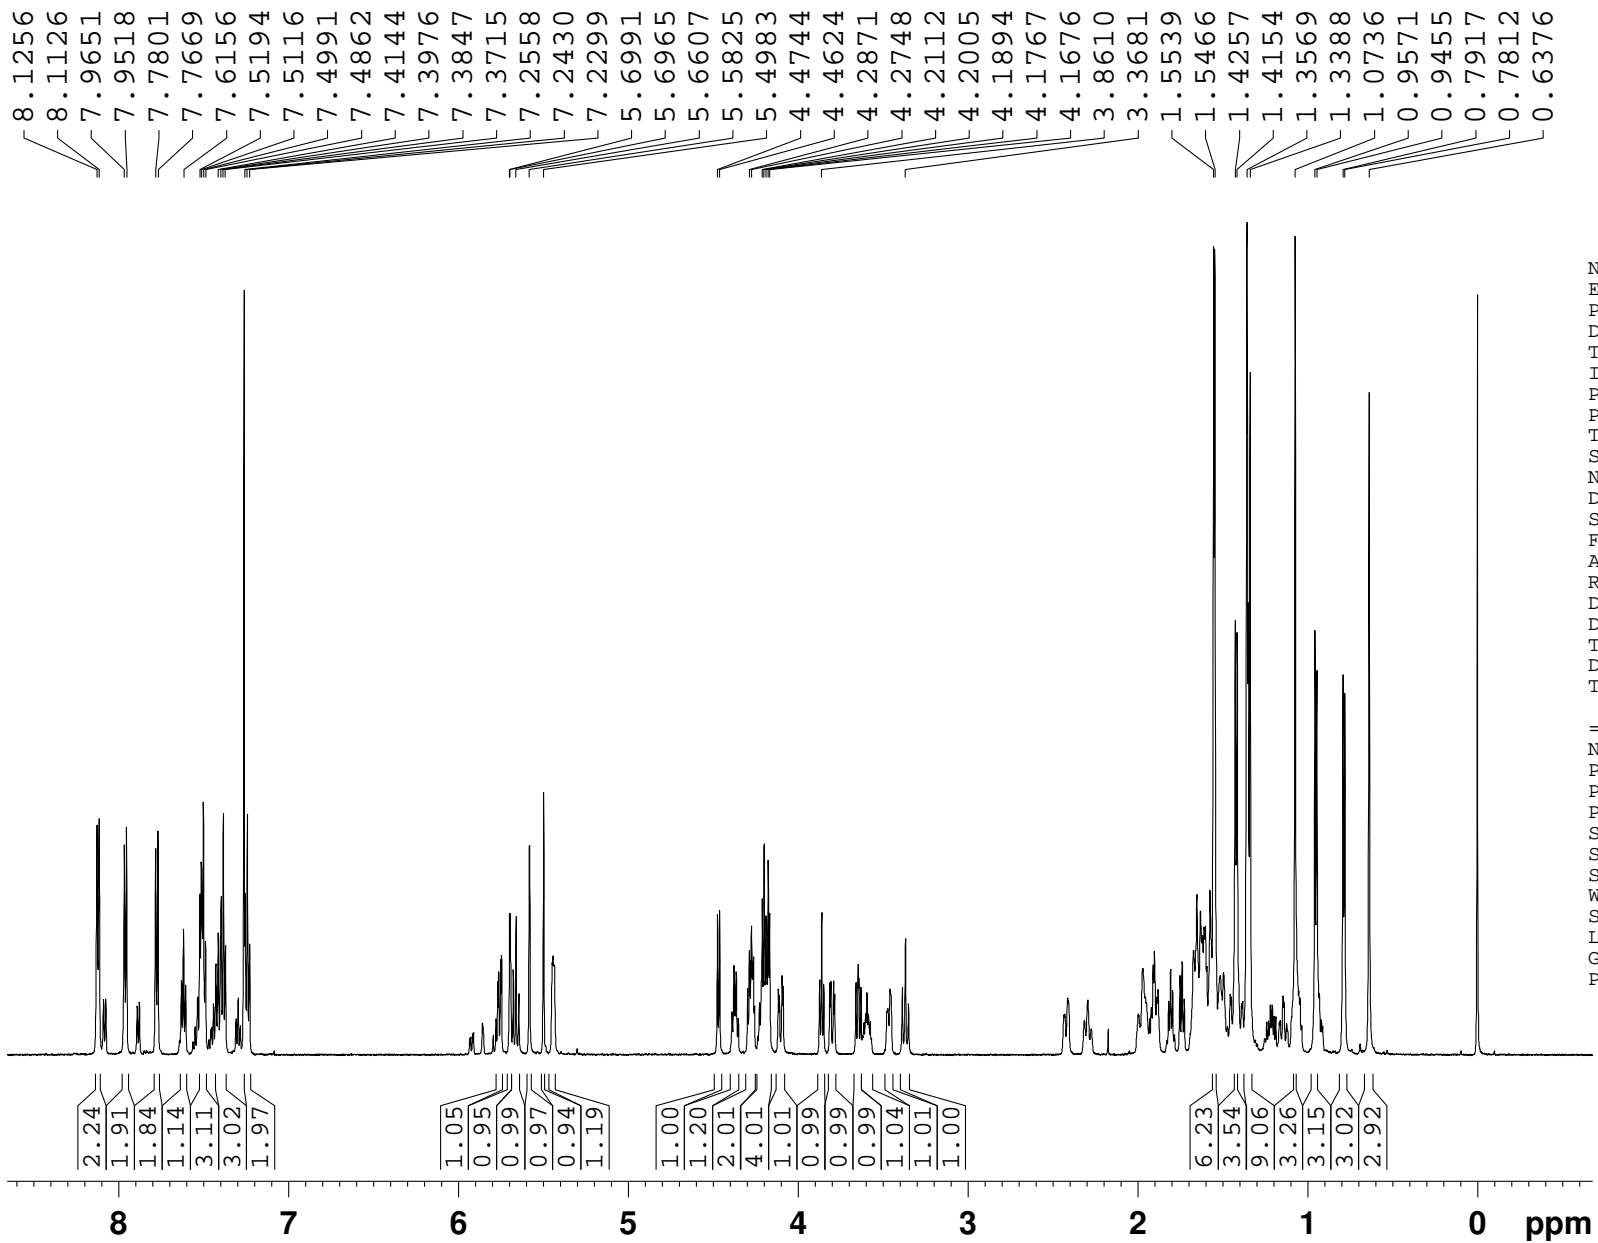

NAME ZP20110311  
EXPNO 1  
PROCNO 1  
Date\_ 20110311  
Time 10.33  
INSTRUM spect  
PROBHD 5 mm PABBO BB-  
PULPROG zg30  
TD 65536  
SOLVENT CDCl3  
NS 8  
DS 2  
SWH 17985.611 Hz  
FIDRES 0.274439 Hz  
AQ 1.8219786 sec  
RG 228  
DW 27.800 usec  
DE 6.50 usec  
TE 293.2 K  
D1 1.00000000 sec  
TD0 1

===== CHANNEL f1 =====  
NUC1 1H  
P1 11.10 usec  
PL1 -4.00 dB  
PL1W 34.70265579 W  
SF01 600.1324005 MHz  
SI 32768  
SF 600.1300081 MHz  
WDW EM  
SSB 0  
LB 0.30 Hz  
GB 0  
PC 1.00

<sup>13</sup>C NMR of Compound 15

AV-600-13C

Sample:

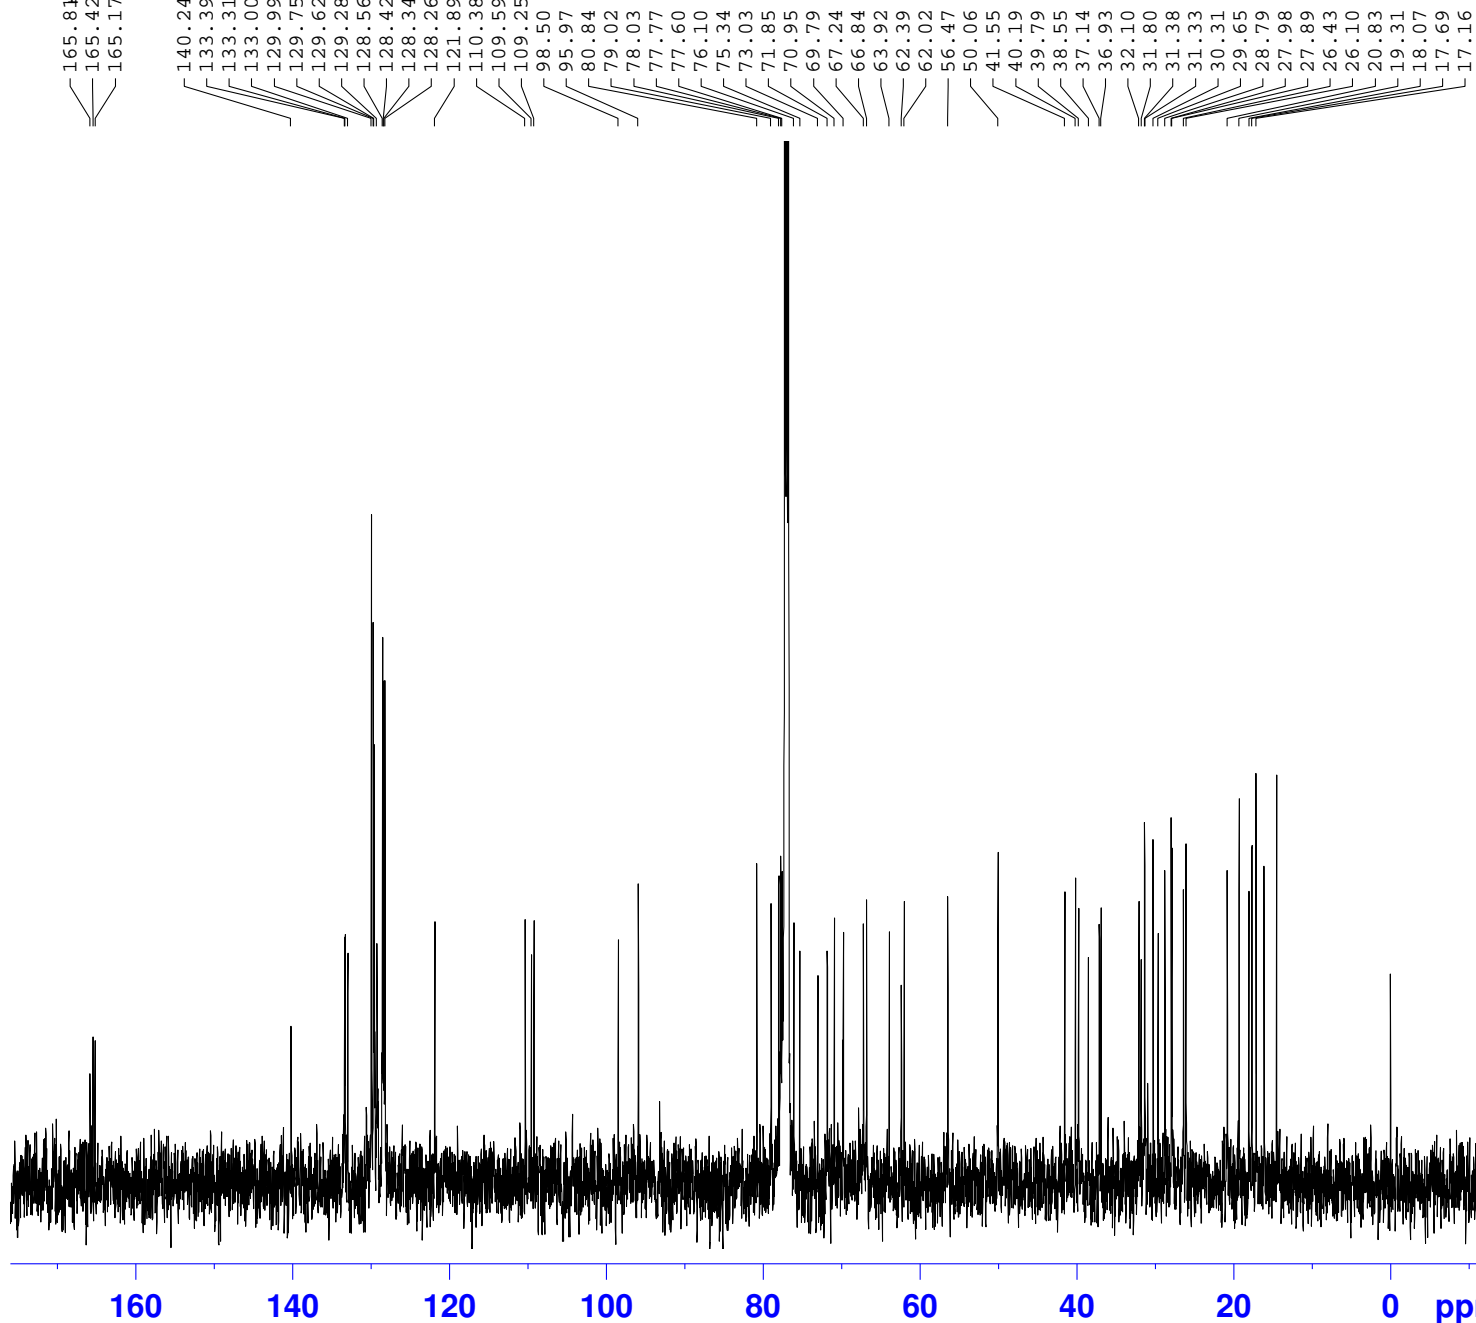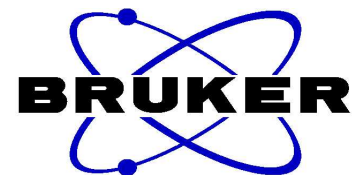

NAME ZP20110311  
EXPNO 2  
PROCNO 1  
Date\_ 20090413  
Time 10.20  
INSTRUM spect  
PROBHD 5 mm PABBO BB-  
PULPROG zgpg30  
TD 65536  
SOLVENT Pyr  
NS 347  
DS 2  
SWH 45454.547 Hz  
FIDRES 0.693581 Hz  
AQ 0.7209570 sec  
RG 9200  
DW 11.000 usec  
DE 6.50 usec  
TE 295.4 K  
D1 2.00000000 sec  
D11 0.03000000 sec  
TD0 1

==== CHANNEL f1 =====  
NUC1 13C  
P1 8.80 usec  
PL1 1.00 dB  
PL1W 83.20243835 W  
SFO1 150.9178993 MHz

==== CHANNEL f2 =====  
CPDPRG2 waltz16  
NUC2 1H  
PCPD2 80.00 usec  
PL2 -4.00 dB  
PL12 13.16 dB  
PL13 16.00 dB  
PL2W 34.70265579 W  
PL12W 0.66736388 W  
PL13W 0.34702653 W  
SFO2 600.1324005 MHz  
SI 32768  
SF 150.9028090 MHz  
WDW EM  
SSB 0  
LB 3.00 Hz  
GB 0  
PC 1.40

AV-600-1H

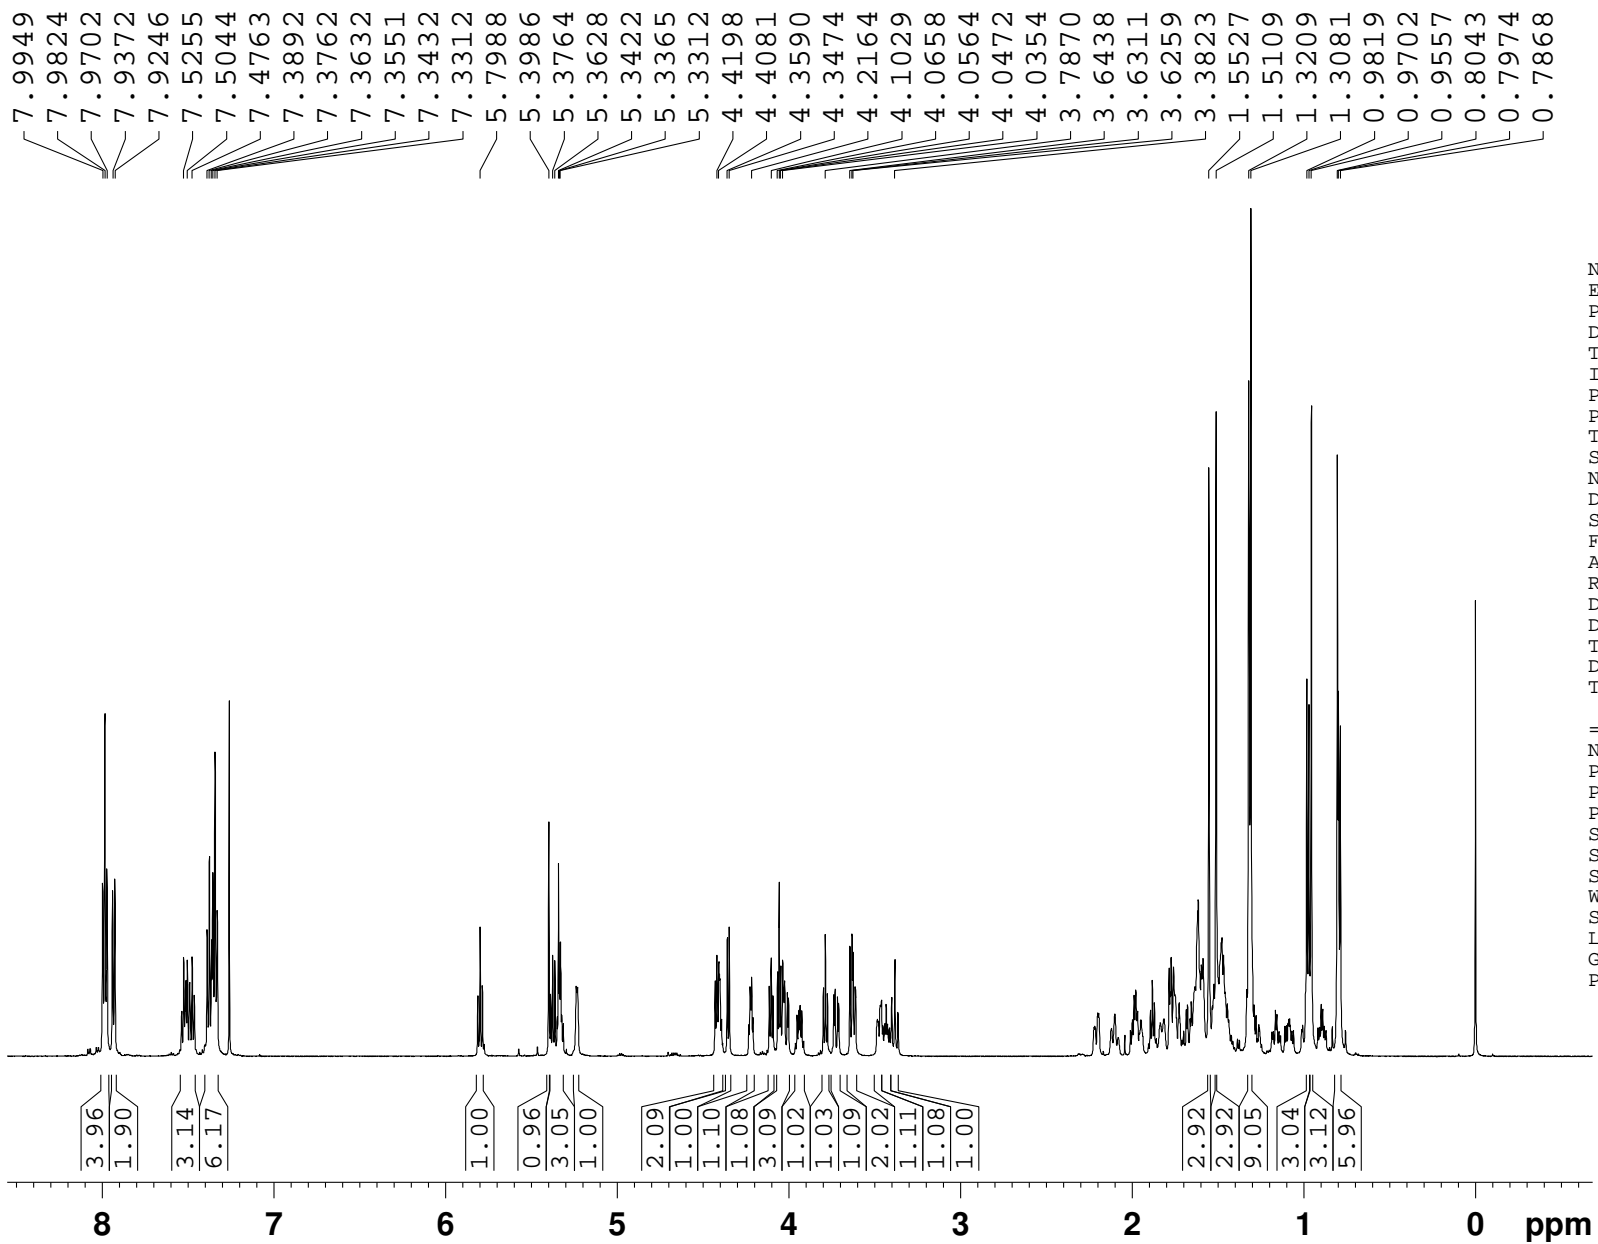

NAME ZP20101201B  
EXPNO 1  
PROCNO 1  
Date\_ 20101201  
Time 11.08  
INSTRUM spect  
PROBHD 5 mm PABBO BB-  
PULPROG zg30  
TD 65536  
SOLVENT CDCl3  
NS 8  
DS 2  
SWH 17985.611 Hz  
FIDRES 0.274439 Hz  
AQ 1.8219786 sec  
RG 144  
DW 27.800 usec  
DE 6.50 usec  
TE 298.2 K  
D1 1.00000000 sec  
TD0 1

===== CHANNEL f1 =====  
NUC1 1H  
P1 11.10 usec  
PL1 -4.00 dB  
PL1W 34.70265579 W  
SF01 600.1324005 MHz  
SI 32768  
SF 600.1300096 MHz  
WDW EM  
SSB 0  
LB 0.30 Hz  
GB 0  
PC 1.00

<sup>13</sup>C NMR of Compound 16

AV-600-13C

Sample: ZP20101201B

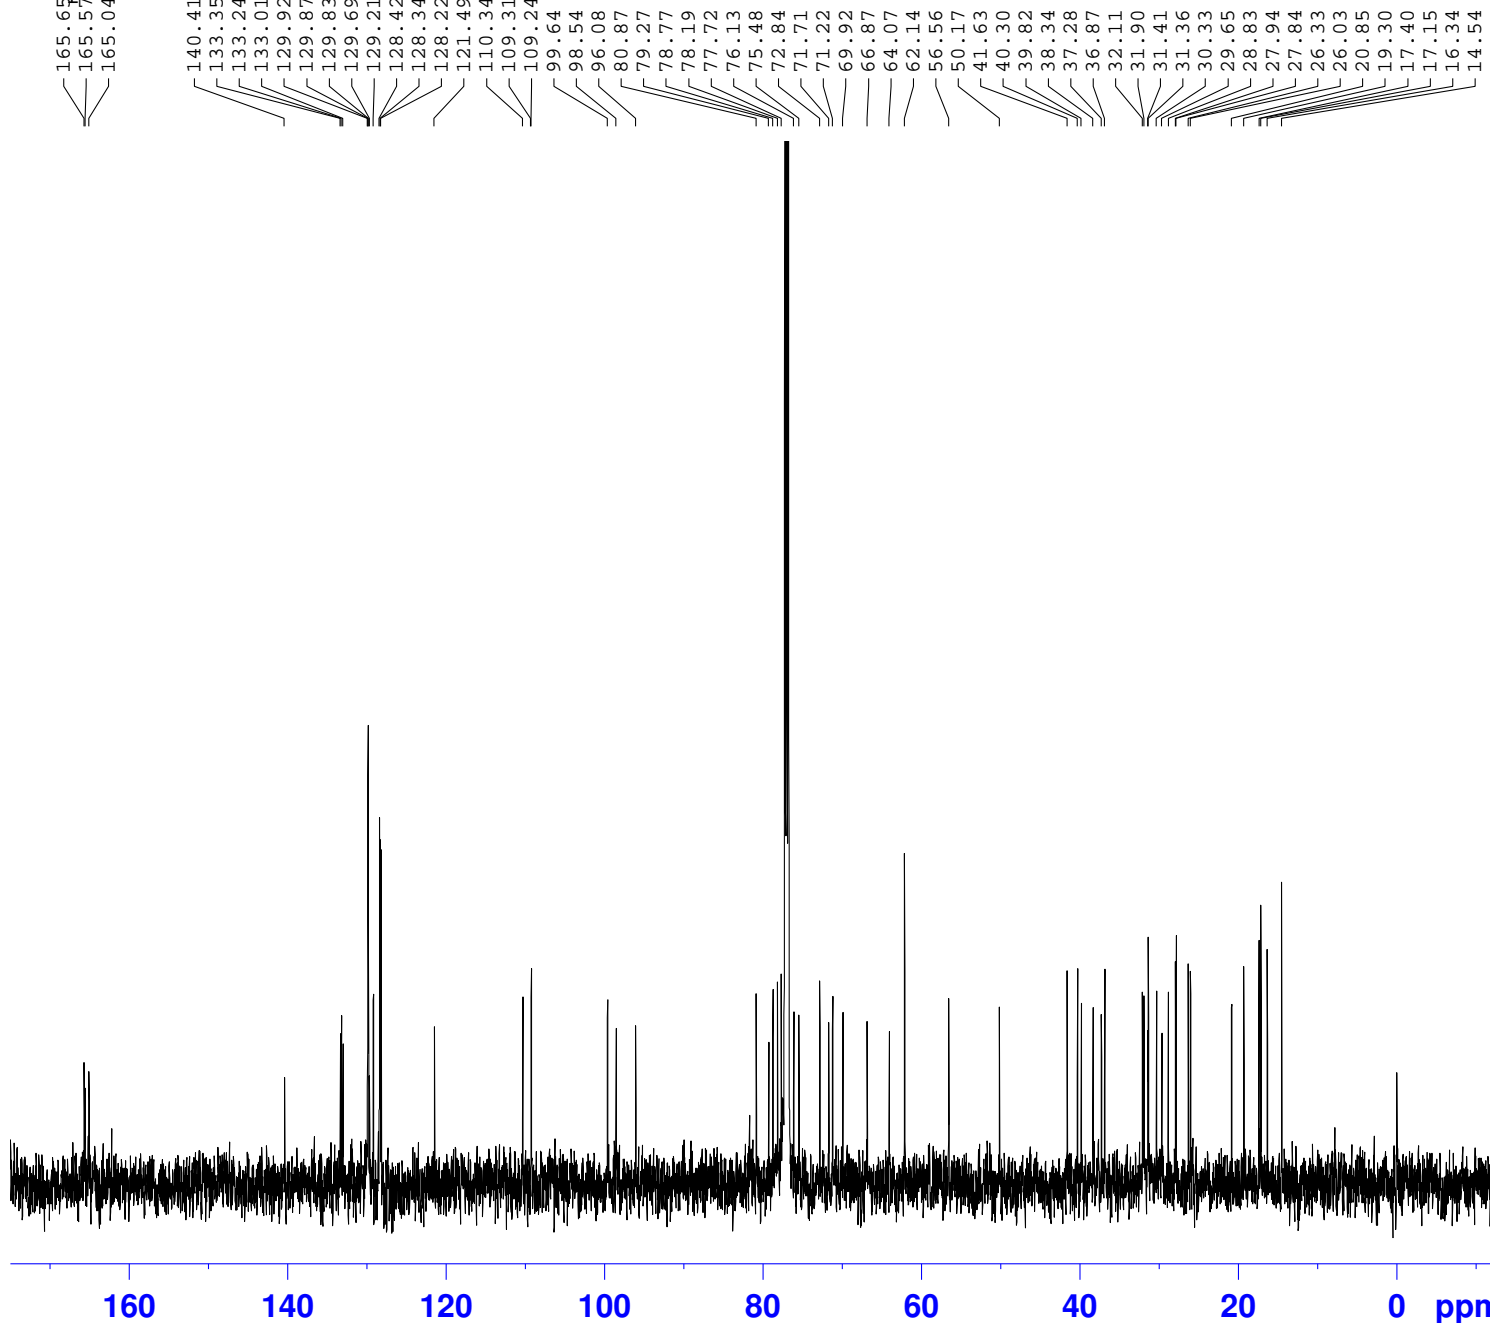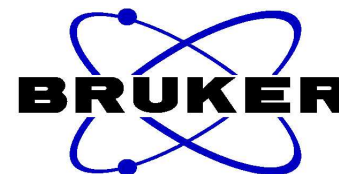

NAME ZP20101201B  
EXPNO 2  
PROCNO 1  
Date\_ 20101201  
Time 11.13  
INSTRUM spect  
PROBHD 5 mm PABBO BB-  
PULPROG zgpg30  
TD 65536  
SOLVENT CDCl3  
NS 412  
DS 2  
SWH 45454.547 Hz  
FIDRES 0.693581 Hz  
AQ 0.7209570 sec  
RG 23100  
DW 11.000 usec  
DE 6.50 usec  
TE 298.2 K  
D1 2.00000000 sec  
D11 0.03000000 sec  
TD0 1

==== CHANNEL f1 =====  
NUC1 13C  
P1 8.80 usec  
PL1 1.00 dB  
PL1W 83.20243835 W  
SFO1 150.9178993 MHz

==== CHANNEL f2 =====  
CPDPRG2 waltz16  
NUC2 1H  
PCPD2 80.00 usec  
PL2 -4.00 dB  
PL12 13.16 dB  
PL13 16.00 dB  
PL2W 34.70265579 W  
PL12W 0.66736388 W  
PL13W 0.34702653 W  
SFO2 600.1324005 MHz  
SI 32768  
SF 150.9028069 MHz  
WDW EM  
SSB 0  
LB 3.00 Hz  
GB 0  
PC 1.40

AV-600-1H

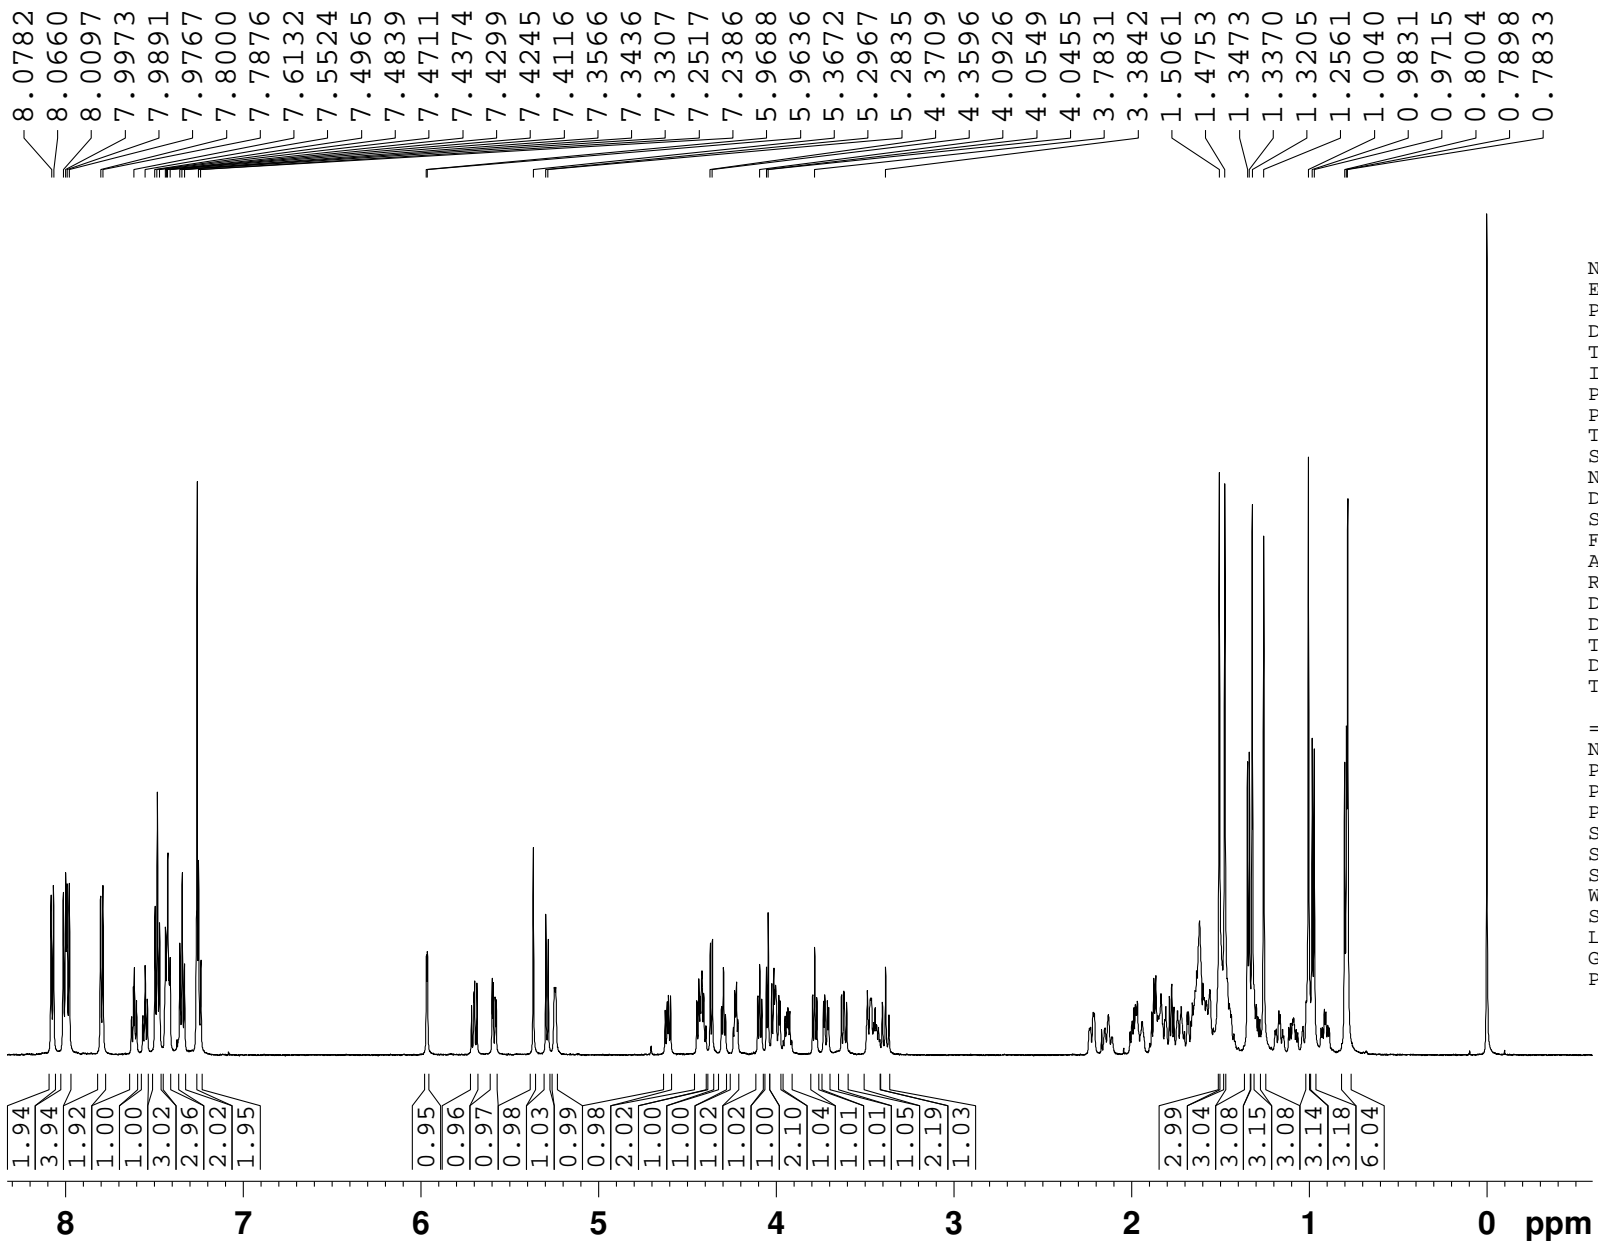

NAME ZP20101126B  
EXPNO 1  
PROCNO 1  
Date\_ 20101126  
Time 15.33  
INSTRUM spect  
PROBHD 5 mm PABBO BB-  
PULPROG zg30  
TD 65536  
SOLVENT CDCl3  
NS 8  
DS 2  
SWH 12019.230 Hz  
FIDRES 0.183399 Hz  
AQ 2.7263892 sec  
RG 203  
DW 41.600 usec  
DE 6.50 usec  
TE 298.2 K  
D1 1.00000000 sec  
TD0 1

==== CHANNEL f1 =====  
NUC1 1H  
P1 11.10 usec  
PL1 -4.00 dB  
PL1W 34.70265579 W  
SF01 600.1324005 MHz  
SI 32768  
SF 600.1300101 MHz  
WDW EM  
SSB 0  
LB 0.30 Hz  
GB 0  
PC 1.00



<sup>13</sup>C NMR of Compound 17

AV-600-13C

Sample: ZP20101126B

166.100  
165.611  
165.266  
140.461  
133.459  
133.271  
133.191  
132.911  
130.011  
129.821  
129.751  
129.201  
128.911  
128.621  
128.481  
128.261  
128.181  
121.441  
110.331  
109.311  
109.151  
101.071  
98.451  
96.251  
81.221  
80.861  
78.601  
78.051  
77.551  
76.071  
75.831  
72.711  
72.081  
71.401  
70.091  
68.371  
66.871  
64.191  
62.321  
62.141  
62.001  
56.531  
50.151  
41.631  
40.291  
39.801  
38.281  
37.331  
36.911  
32.141  
31.921  
31.421  
31.381  
30.321  
29.651  
28.831  
27.981  
27.841  
26.211  
25.991  
20.861  
19.371  
17.461  
17.151  
16.301  
14.541

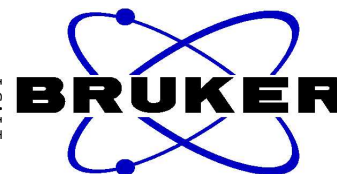

NAME ZP20101126B  
EXPNO 2  
PROCNO 1  
Date\_ 20101126  
Time 16.21  
INSTRUM spect  
PROBHD 5 mm PABBO BB-  
PULPROG zgpg30  
TD 65536  
SOLVENT CDCl3  
NS 1059  
DS 2  
SWH 45454.547 Hz  
FIDRES 0.693581 Hz  
AQ 0.7209570 sec  
RG 20600  
DW 11.000 usec  
DE 6.50 usec  
TE 298.2 K  
D1 2.00000000 sec  
D11 0.03000000 sec  
TD0 1

==== CHANNEL f1 =====  
NUC1 13C  
P1 8.80 usec  
PL1 1.00 dB  
PL1W 83.20243835 W  
SFO1 150.9178993 MHz

==== CHANNEL f2 =====  
CPDPRG2 waltz16  
NUC2 1H  
PCPD2 80.00 usec  
PL2 -4.00 dB  
PL12 13.16 dB  
PL13 16.00 dB  
PL2W 34.70265579 W  
PL12W 0.66736388 W  
PL13W 0.34702653 W  
SFO2 600.1324005 MHz  
SI 32768  
SF 150.9028071 MHz  
WDW EM  
SSB 0  
LB 3.00 Hz  
GB 0  
PC 1.40

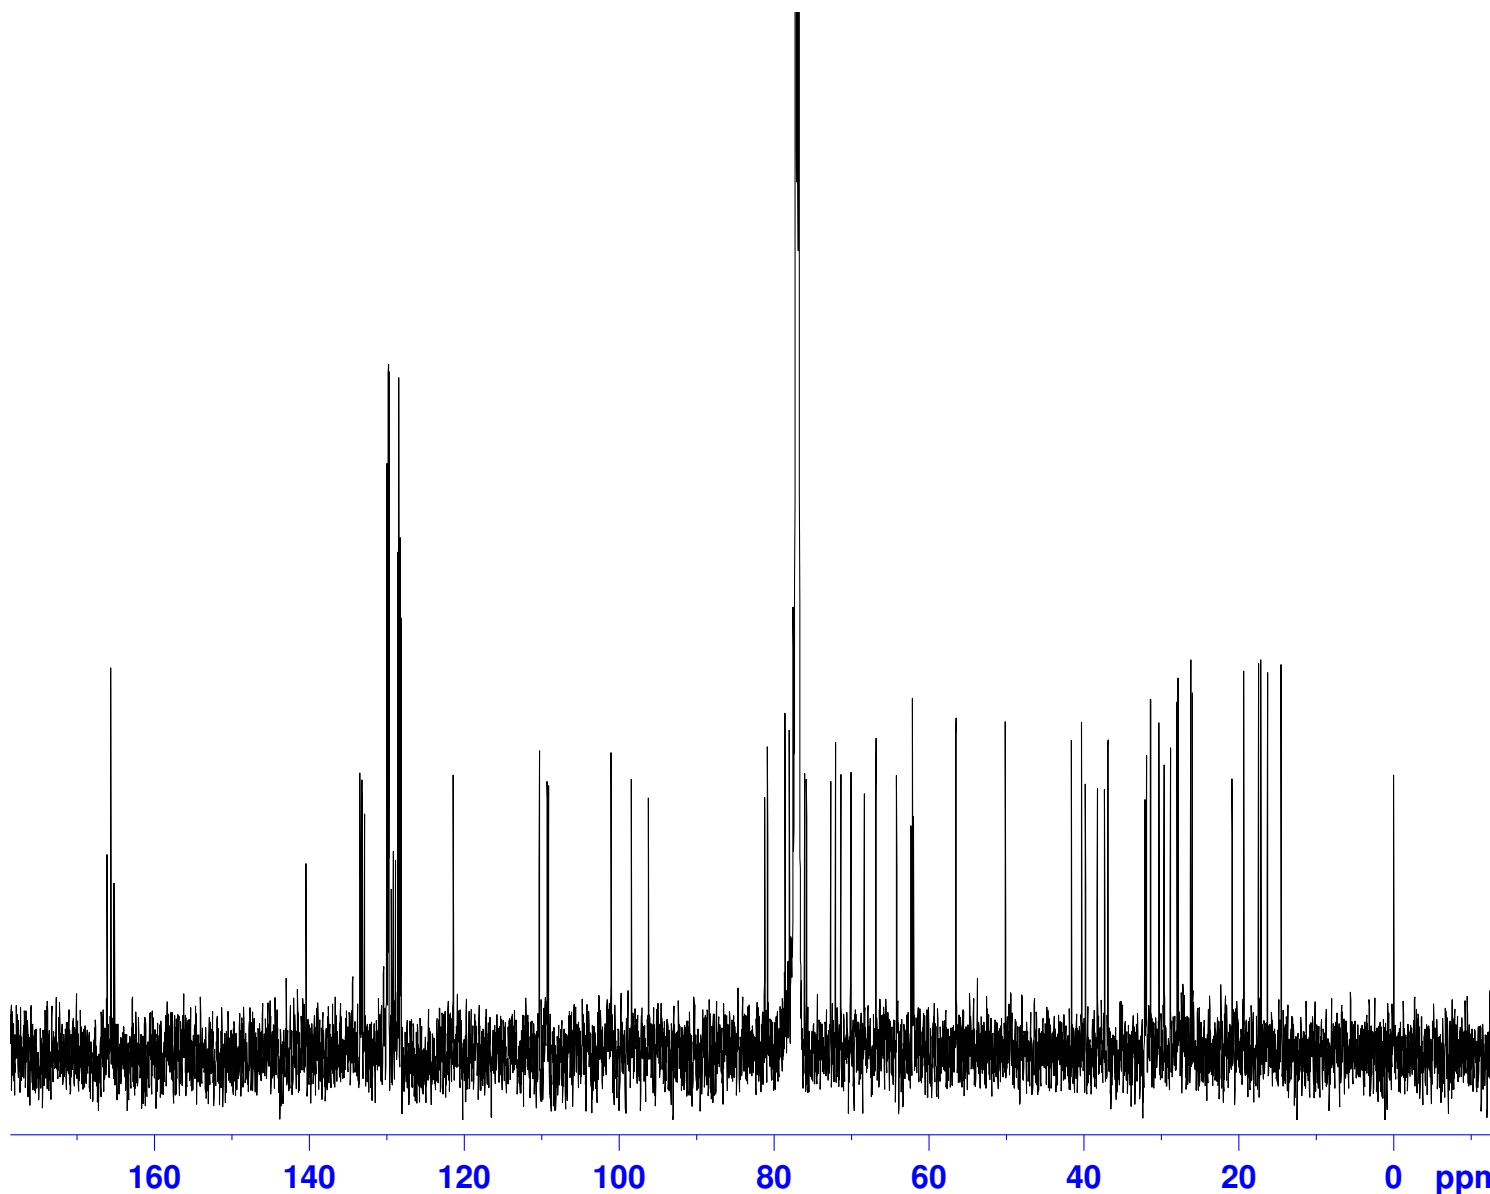

AV-600-1H

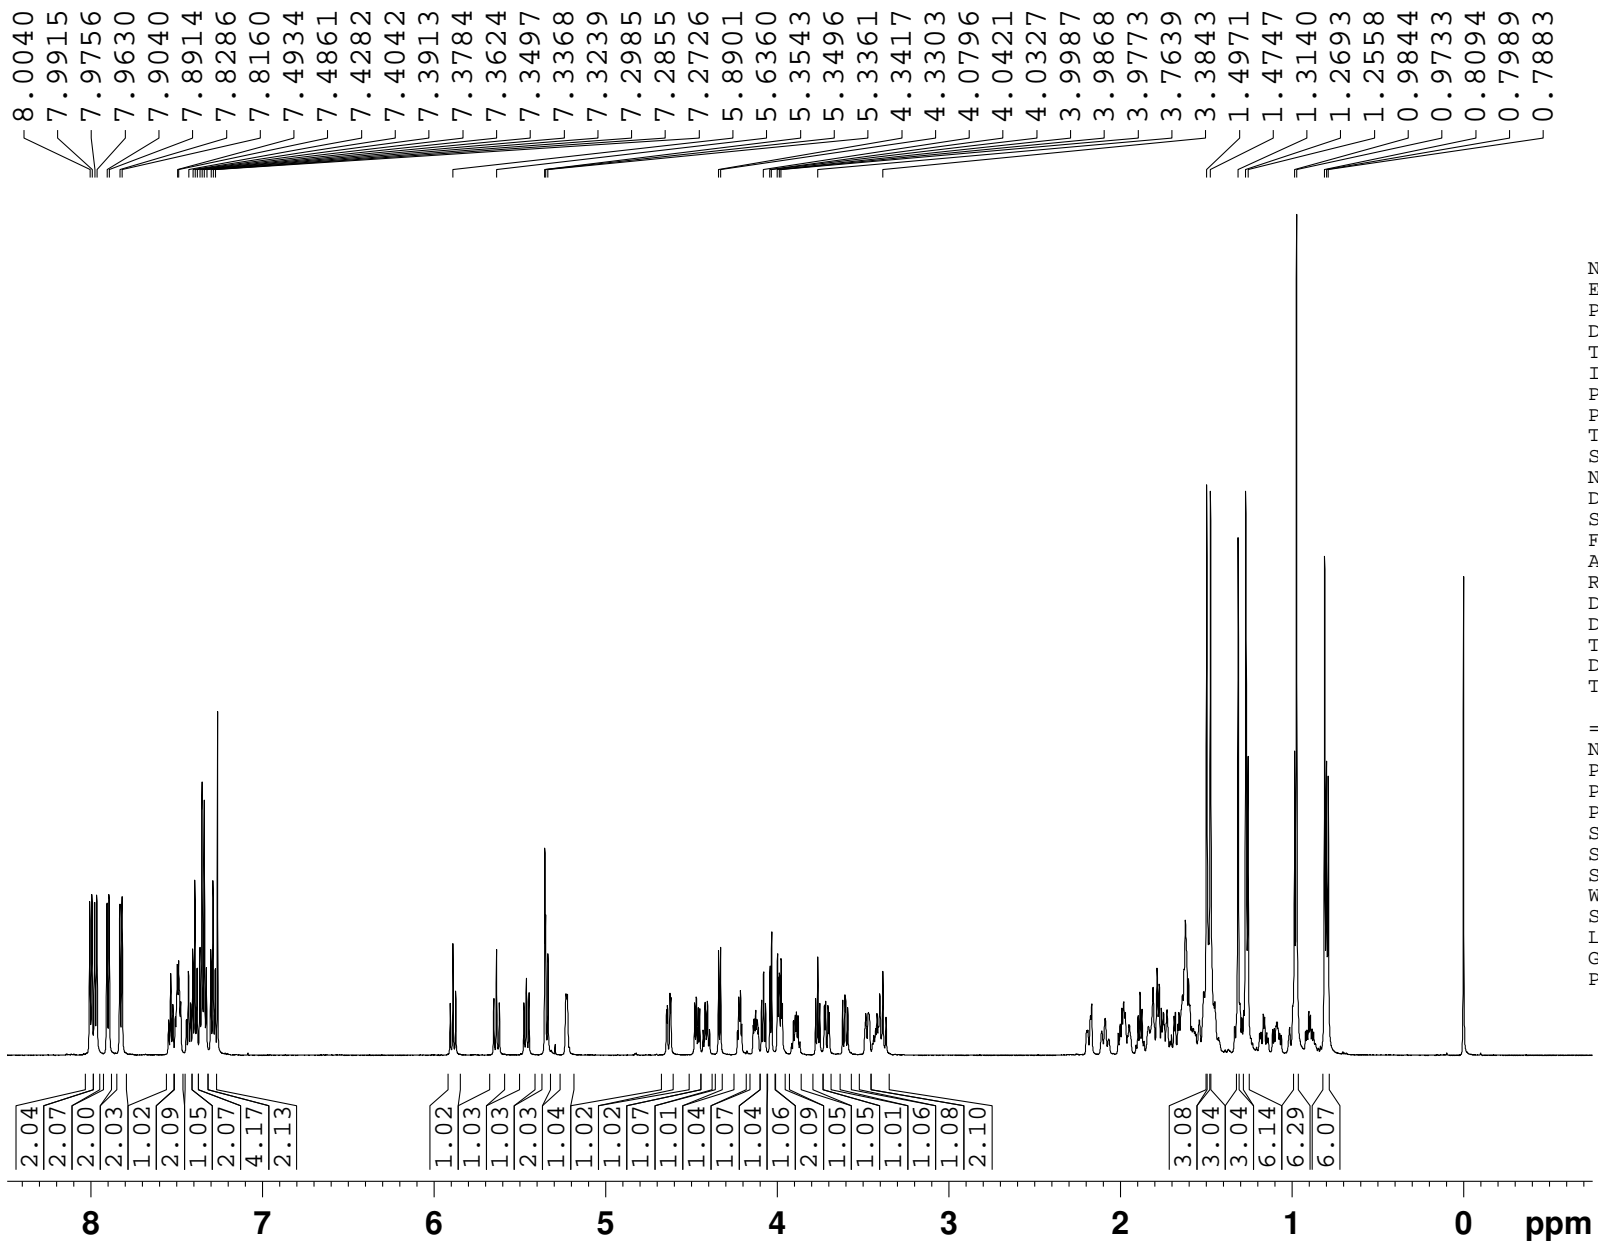

NAME ZP20101126A  
EXPNO 1  
PROCNO 1  
Date\_ 20101126  
Time 15.02  
INSTRUM spect  
PROBHD 5 mm PABBO BB-  
PULPROG zg30  
TD 65536  
SOLVENT CDCl3  
NS 8  
DS 2  
SWH 12019.230 Hz  
FIDRES 0.183399 Hz  
AQ 2.7263892 sec  
RG 203  
DW 41.600 usec  
DE 6.50 usec  
TE 298.2 K  
D1 1.00000000 sec  
TD0 1

==== CHANNEL f1 =====  
NUC1 1H  
P1 11.10 usec  
PL1 -4.00 dB  
PL1W 34.70265579 W  
SF01 600.1324005 MHz  
SI 32768  
SF 600.1300101 MHz  
WDW EM  
SSB 0  
LB 0.30 Hz  
GB 0  
PC 1.00

13C NMR of Compound 18

AV-600-13C

Sample: ZP20101126A

166.12  
165.85  
165.07  
140.46  
133.39  
133.15  
133.09  
132.94  
129.86  
129.84  
129.77  
129.74  
129.58  
128.97  
128.38  
128.27  
128.18  
121.42  
110.33  
109.31  
109.14  
100.45  
98.45  
96.21  
80.87  
80.71  
78.71  
78.07  
77.56  
76.07  
75.78  
73.24  
72.78  
72.27  
72.10  
72.10  
69.97  
66.87  
64.04  
63.33  
62.14  
62.04  
56.56  
50.18  
41.62  
40.30  
39.82  
38.25  
37.32  
36.88  
32.12  
31.91  
31.42  
31.37  
30.33  
29.65  
28.83  
27.98  
27.82  
26.25  
25.99  
20.85  
19.33  
17.31  
17.15  
16.35  
14.54

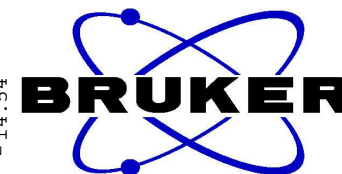

NAME ZP20101126A  
EXPNO 2  
PROCNO 1  
Date\_ 20101126  
Time 15.12  
INSTRUM spect  
PROBHD 5 mm PABBO BB-  
PULPROG zgpg30  
TD 65536  
SOLVENT CDCl3  
NS 339  
DS 2  
SWH 45454.547 Hz  
FIDRES 0.693581 Hz  
AQ 0.7209570 sec  
RG 20600  
DW 11.000 usec  
DE 6.50 usec  
TE 298.2 K  
D1 2.00000000 sec  
D11 0.03000000 sec  
TD0 1

==== CHANNEL f1 =====  
NUC1 13C  
P1 8.80 usec  
PL1 1.00 dB  
PL1W 83.20243835 W  
SFO1 150.9178993 MHz

==== CHANNEL f2 =====  
CPDPRG2 waltz16  
NUC2 1H  
PCPD2 80.00 usec  
PL2 -4.00 dB  
PL12 13.16 dB  
PL13 16.00 dB  
PL2W 34.70265579 W  
PL12W 0.66736388 W  
PL13W 0.34702653 W  
SFO2 600.1324005 MHz  
SI 32768  
SF 150.9028076 MHz  
WDW EM  
SSB 0  
LB 3.00 Hz  
GB 0  
PC 1.40

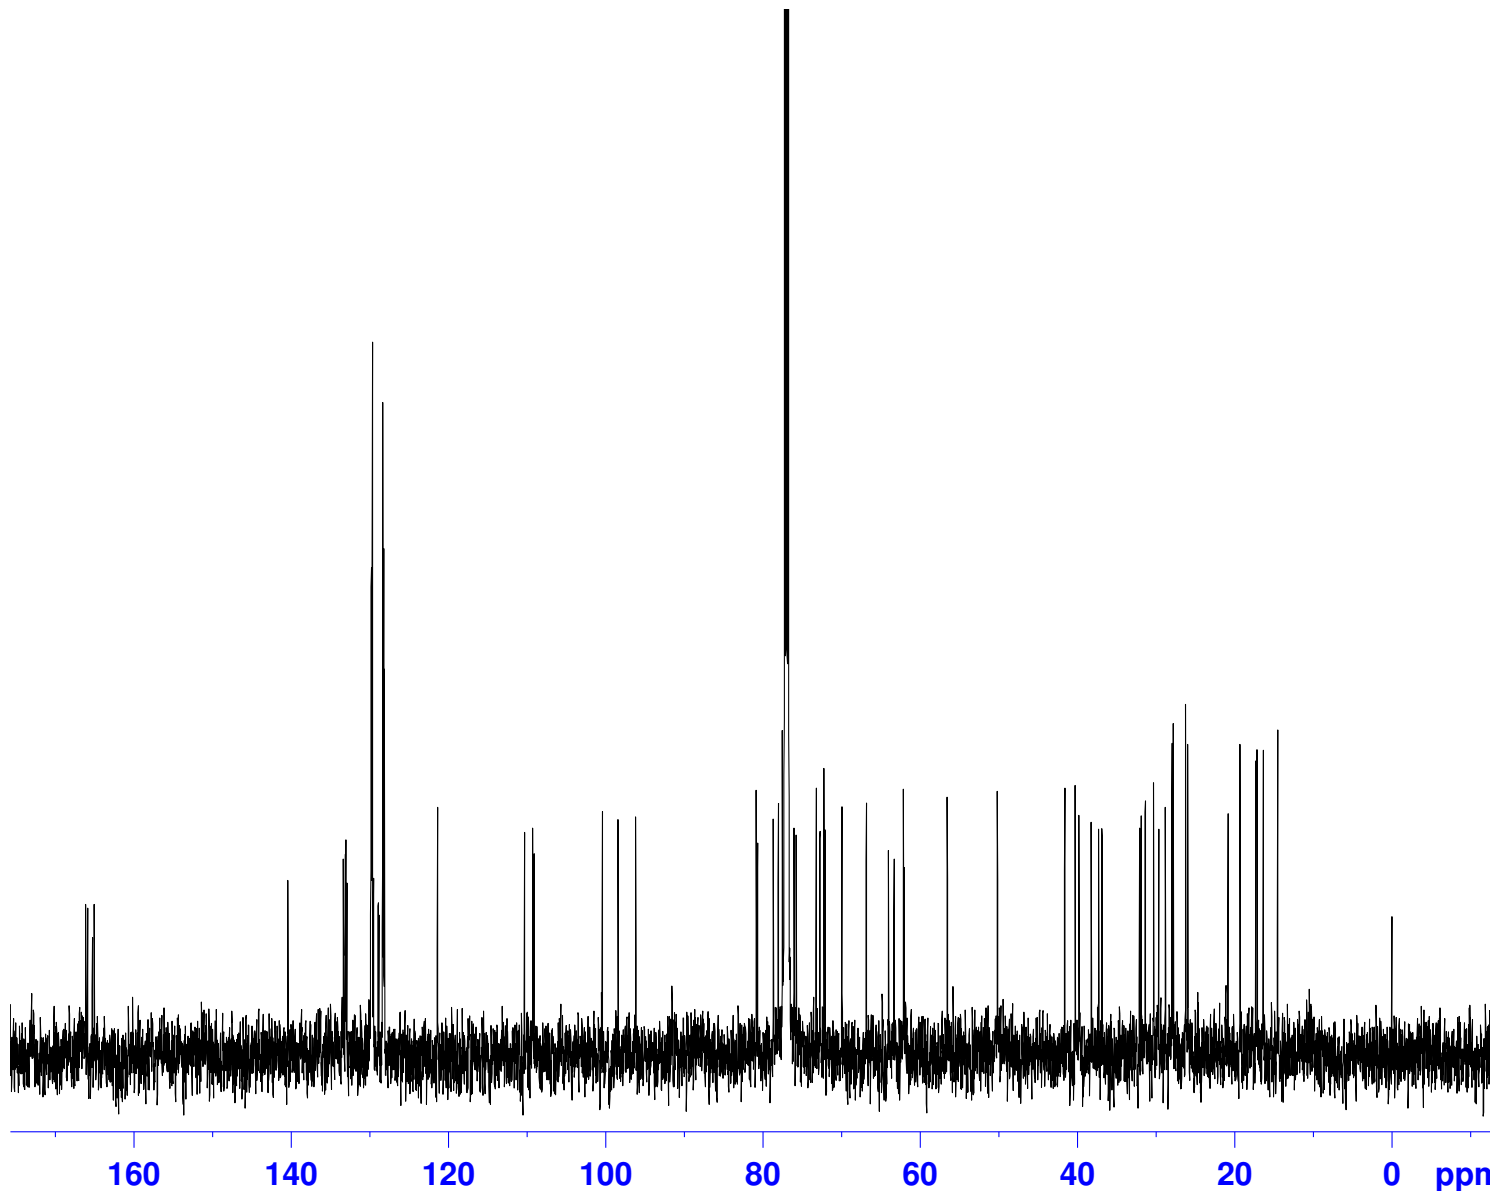

<sup>1</sup>H NMR of Compound 19

AV-600-1H

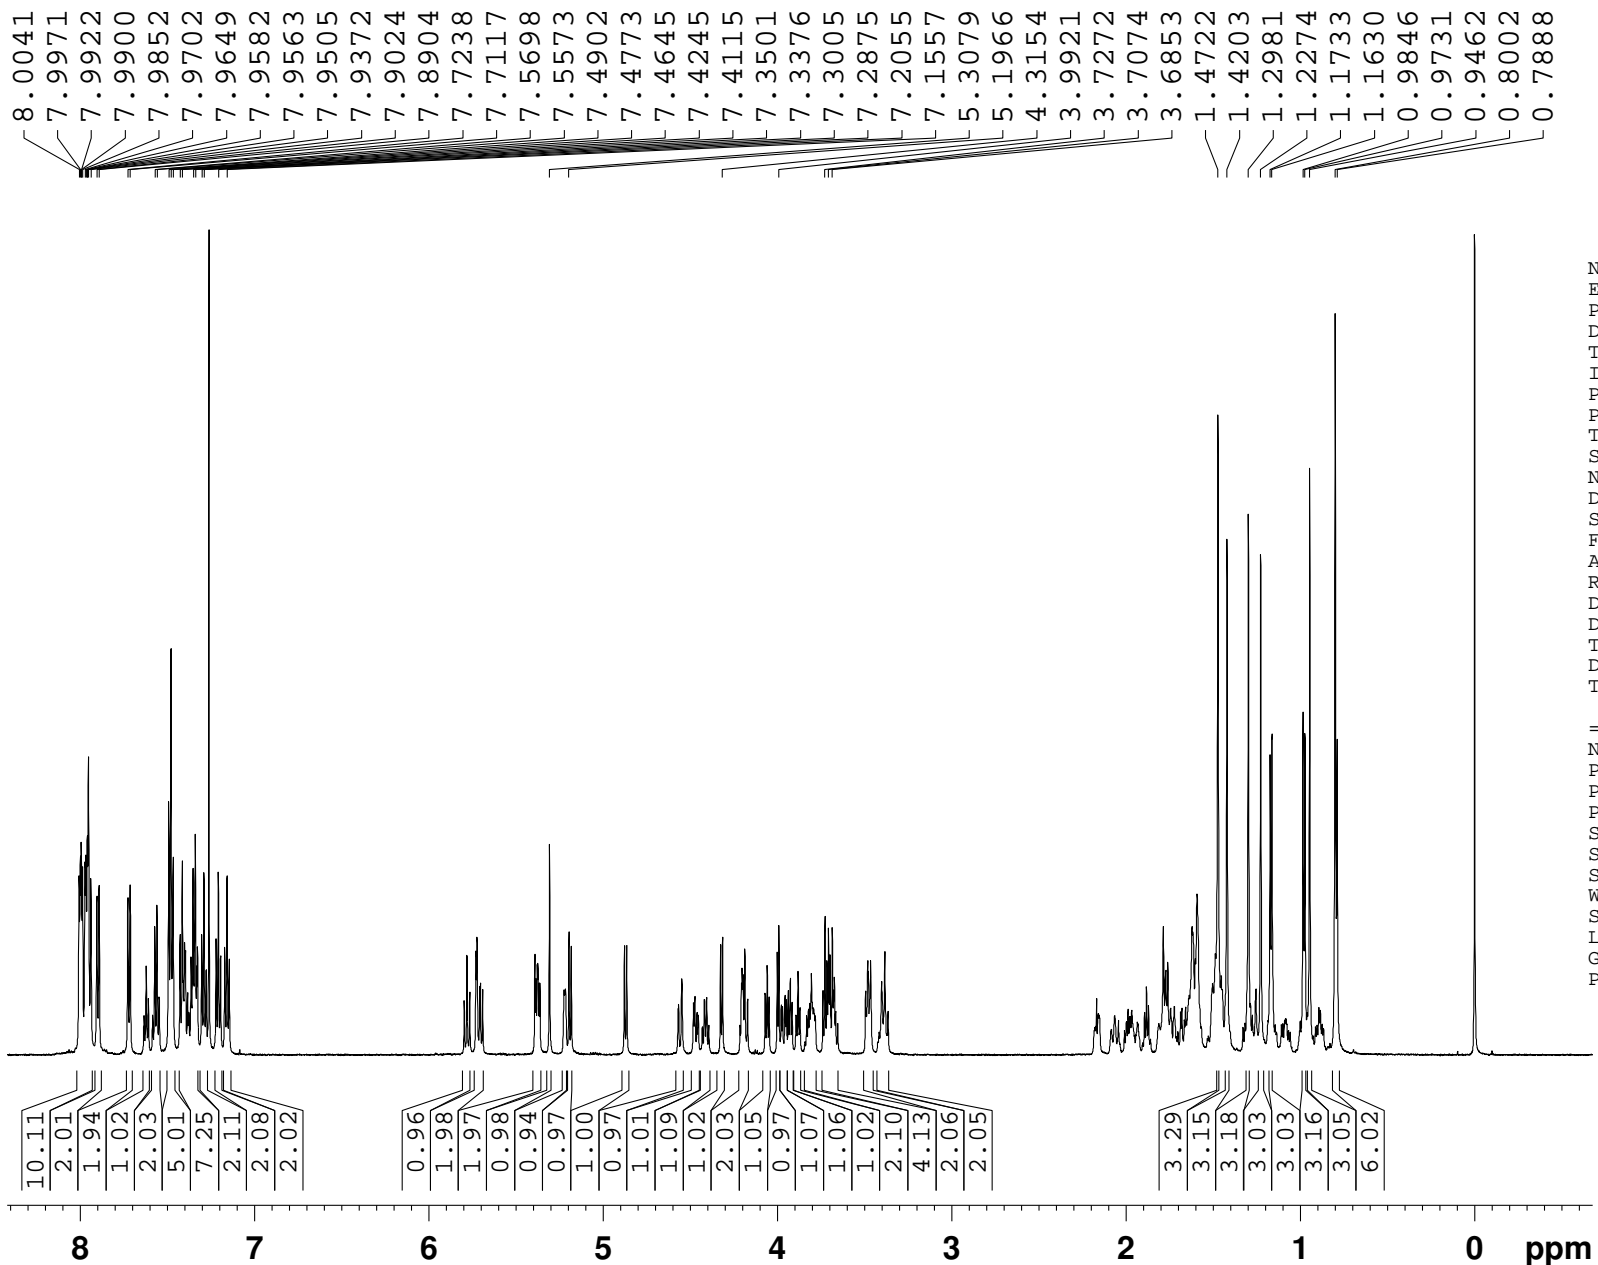

NAME ZP20110328A  
EXPNO 1  
PROCNO 1  
Date\_ 20110328  
Time 15.06  
INSTRUM spect  
PROBHD 5 mm PABBO BB-  
PULPROG zg30  
TD 65536  
SOLVENT CDCl3  
NS 8  
DS 2  
SWH 12019.230 Hz  
FIDRES 0.183399 Hz  
AQ 2.7263892 sec  
RG 256  
DW 41.600 usec  
DE 6.50 usec  
TE 298.2 K  
D1 1.00000000 sec  
TD0 1

===== CHANNEL f1 =====  
NUC1 1H  
P1 11.10 usec  
PL1 -4.00 dB  
PL1W 34.70265579 W  
SF01 600.1324005 MHz  
SI 32768  
SF 600.1300101 MHz  
WDW EM  
SSB 0  
LB 0.30 Hz  
GB 0  
PC 1.00

13C NMR of Compound 19

AV-600-13C

165.560  
165.400  
133.511  
133.321  
133.266  
133.091  
130.01  
129.92  
129.71  
129.57  
129.46  
128.58  
128.51  
128.24  
128.15  
110.29  
109.31  
109.07  
101.16  
100.50  
98.44  
96.23  
80.94  
80.86  
78.59  
77.96  
77.53  
76.38  
76.03  
75.76  
73.21  
73.04  
72.70  
71.99  
71.82  
71.32  
69.96  
66.87  
64.05  
62.13  
61.97  
60.92  
56.54  
50.15  
41.63  
40.29  
39.81  
38.24  
37.31  
36.85  
32.10  
31.91  
31.38  
30.32  
29.63  
28.83  
27.98  
27.80  
26.18  
25.97  
20.84  
19.31  
17.20  
17.15  
16.35  
14.54

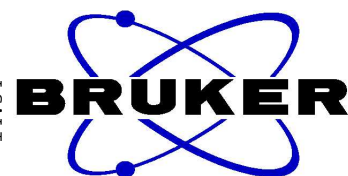

NAME ZP20110328A  
EXPNO 2  
PROCNO 1  
Date\_ 20110331  
Time 8.42  
INSTRUM spect  
PROBHD 5 mm PABBO BB-  
PULPROG zgpg30  
TD 65536  
SOLVENT CDCl3  
NS 728  
DS 2  
SWH 45454.547 Hz  
FIDRES 0.693581 Hz  
AQ 0.7209570 sec  
RG 20600  
DW 11.000 usec  
DE 6.50 usec  
TE 298.2 K  
D1 2.00000000 sec  
D11 0.03000000 sec  
TD0 1

==== CHANNEL f1 =====  
NUC1 13C  
P1 8.80 usec  
PL1 1.00 dB  
PL1W 83.20243835 W  
SFO1 150.9178993 MHz

==== CHANNEL f2 =====  
CPDPRG2 waltz16  
NUC2 1H  
PCPD2 80.00 usec  
PL2 -4.00 dB  
PL12 13.16 dB  
PL13 16.00 dB  
PL2W 34.70265579 W  
PL12W 0.66736388 W  
PL13W 0.34702653 W  
SFO2 600.1324005 MHz  
SI 32768  
SF 150.9028076 MHz  
WDW EM  
SSB 0  
LB 3.00 Hz  
GB 0  
PC 1.40

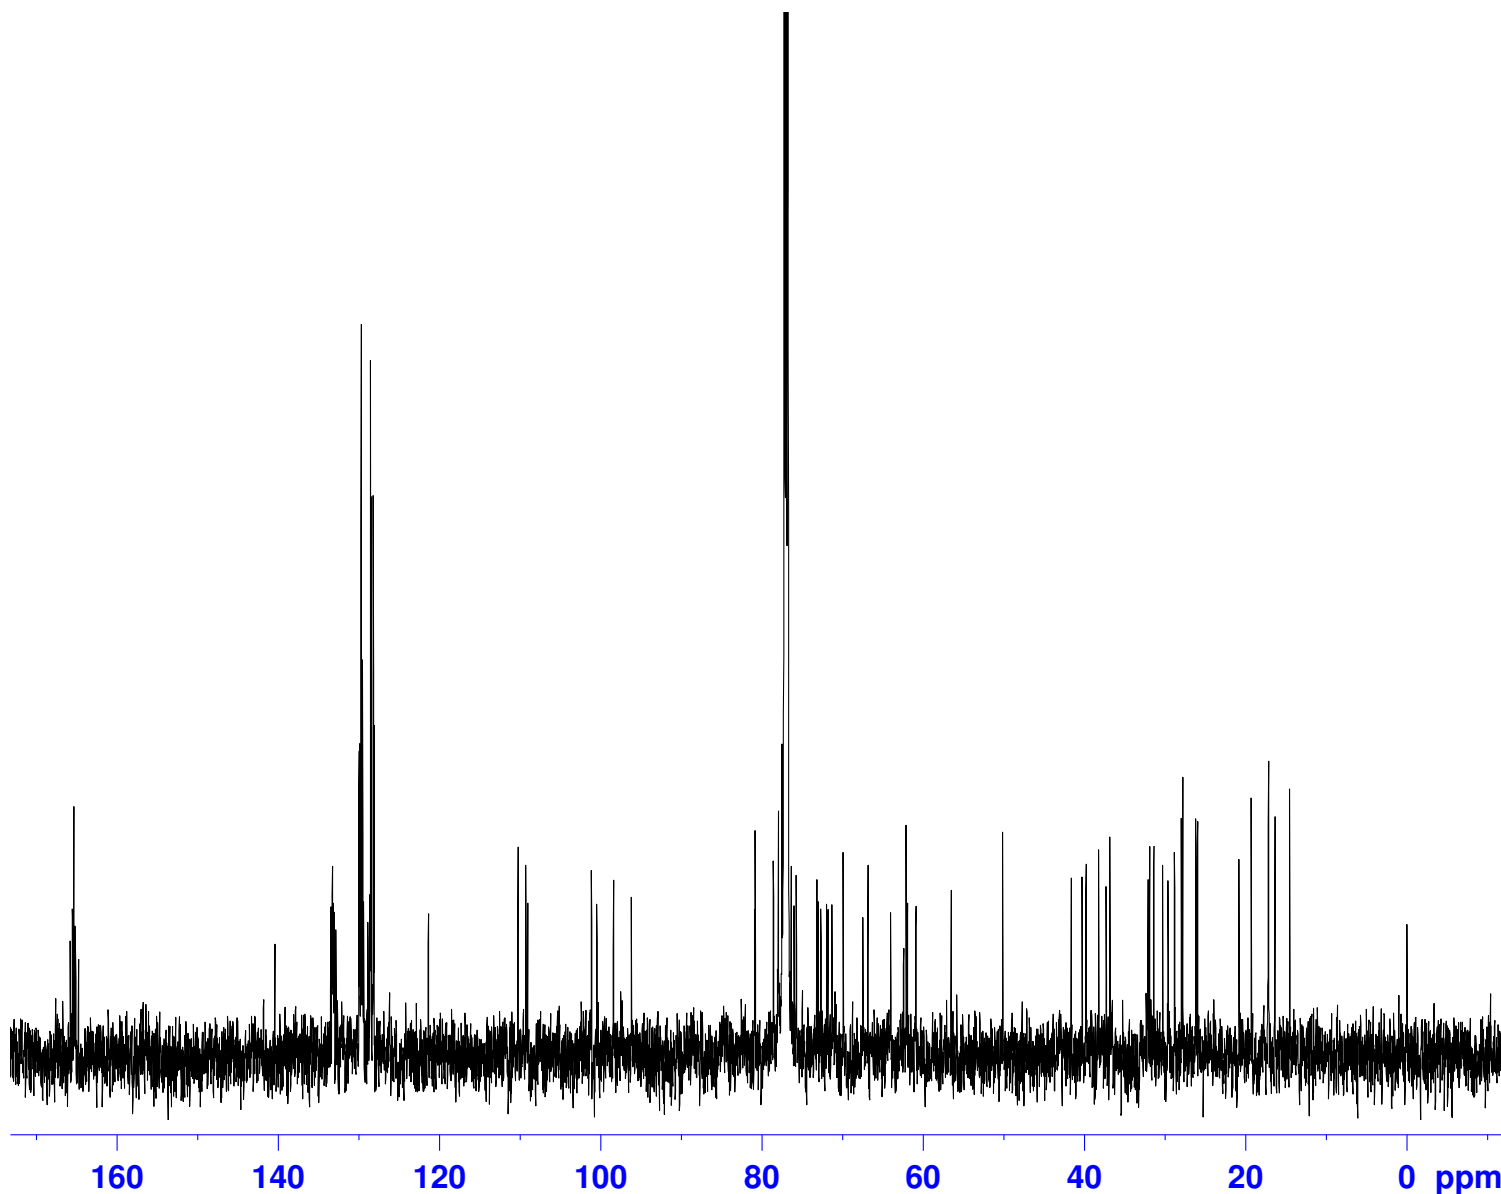

1H NMR of Compound 20

AV-600-1H

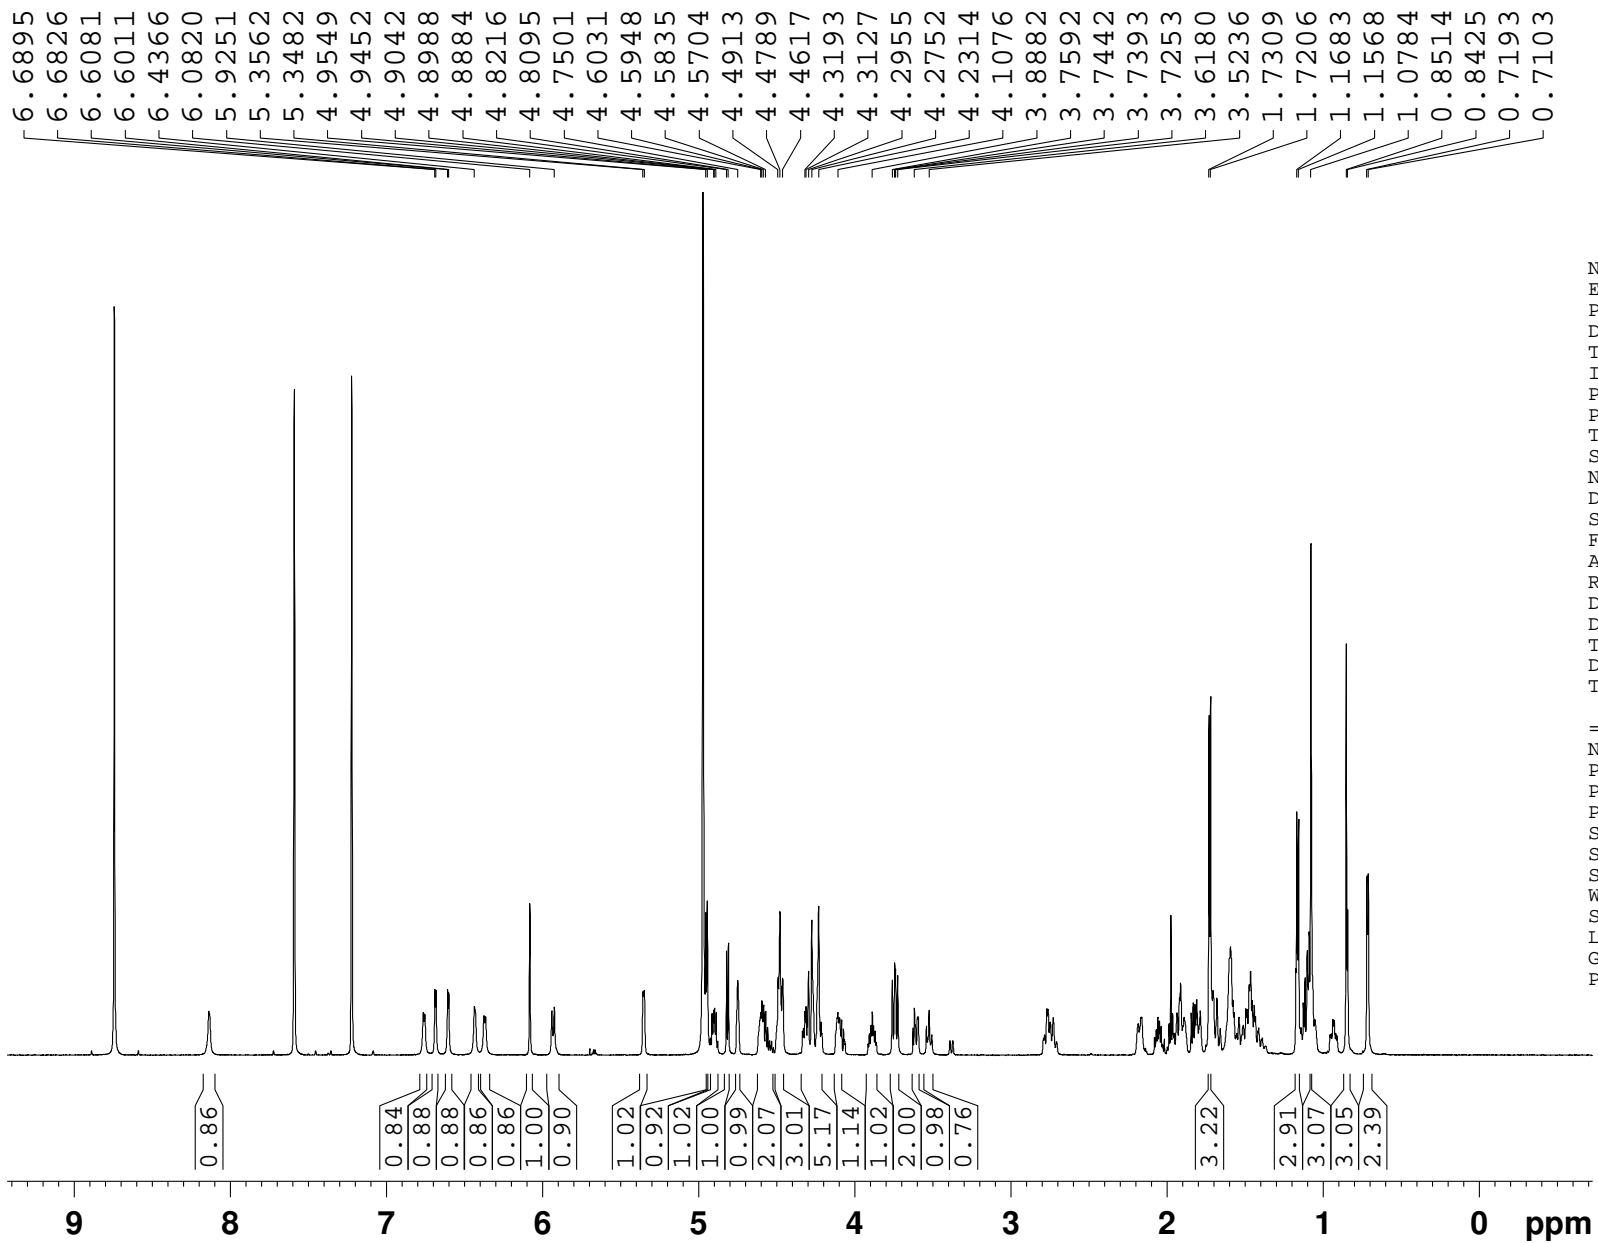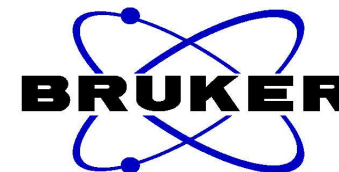

NAME ZP20110412A  
EXPNO 1  
PROCNO 1  
Date\_ 20110413  
Time 8.04  
INSTRUM spect  
PROBHD 5 mm PABBO BB-  
PULPROG zg30  
TD 65536  
SOLVENT Pyr  
NS 8  
DS 2  
SWH 12019.230 Hz  
FIDRES 0.183399 Hz  
AQ 2.7263892 sec  
RG 456  
DW 41.600 usec  
DE 6.50 usec  
TE 298.2 K  
D1 1.00000000 sec  
TD0 1

===== CHANNEL f1 =====  
NUC1 1H  
P1 11.10 usec  
PL1 -4.00 dB  
PL1W 34.70265579 W  
SF01 600.1324005 MHz  
SI 32768  
SF 600.1299729 MHz  
WDW EM  
SSB 0  
LB 0.30 Hz  
GB 0  
PC 1.00

<sup>13</sup>C NMR of Compound 20

AV-600-13C

Sample:

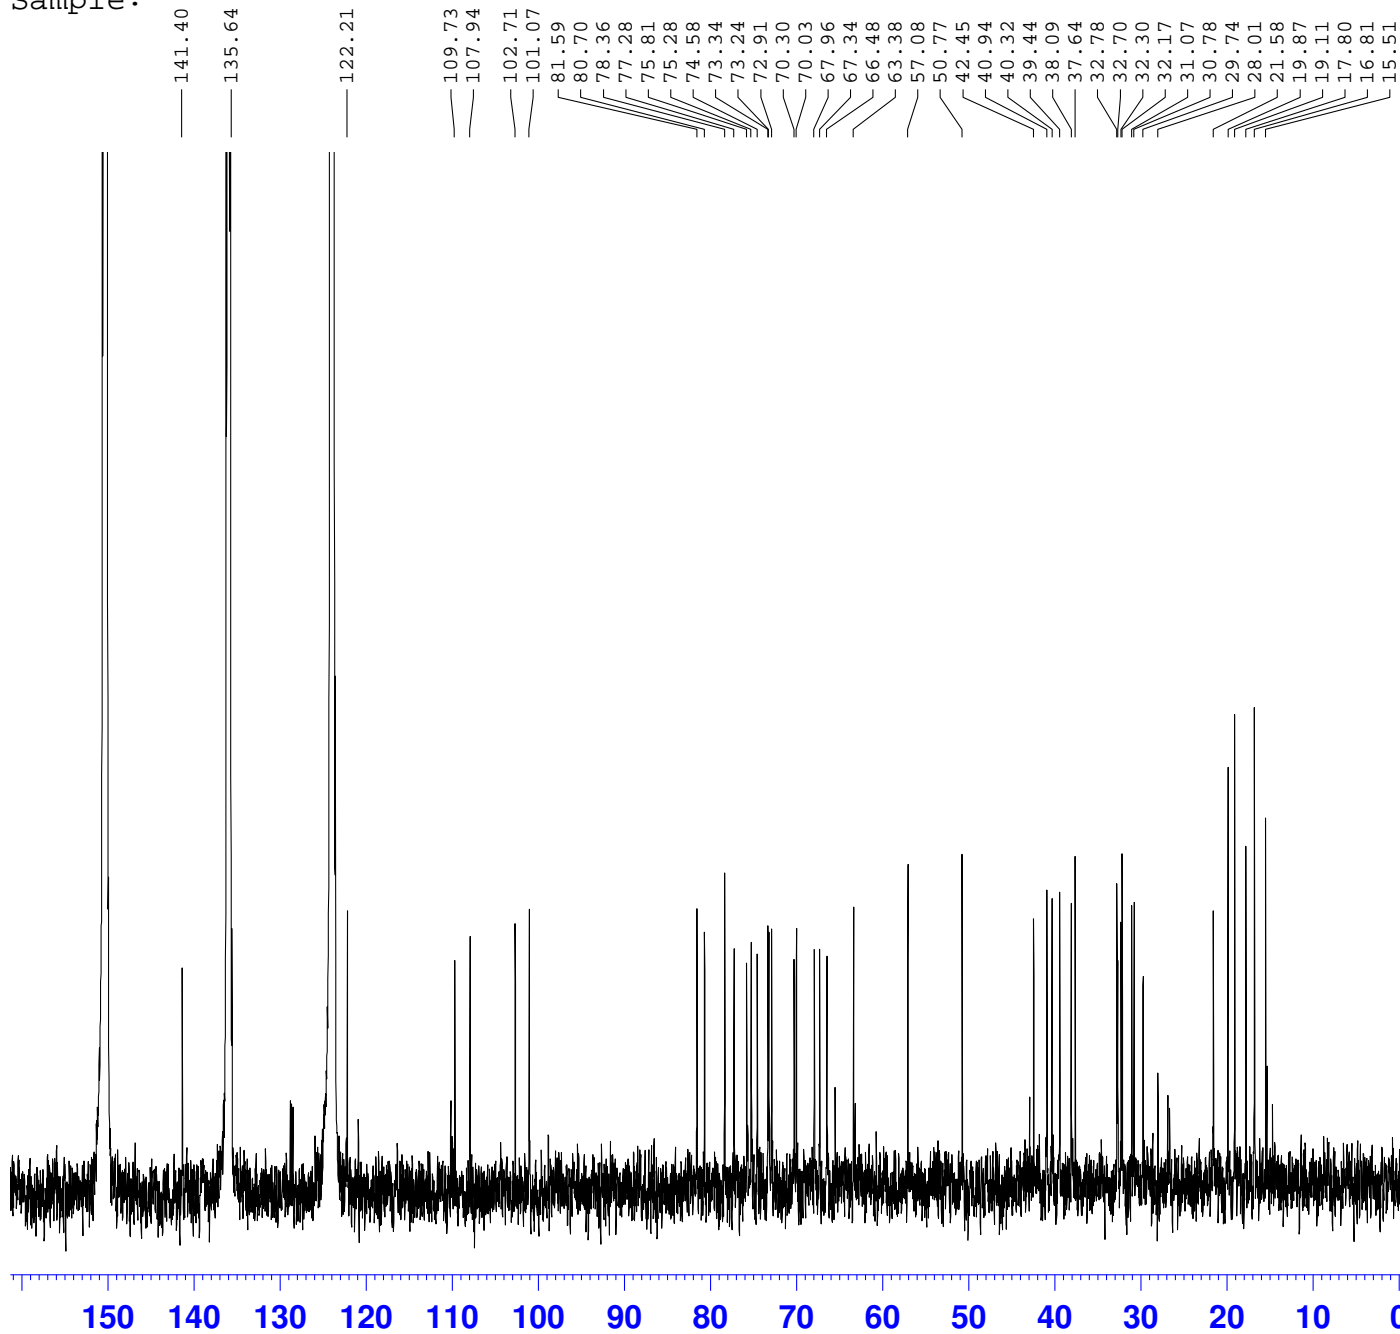

NAME ZP20110412A  
EXPNO 2  
PROCNO 1  
Date\_ 20110413  
Time 8.41  
INSTRUM spect  
PROBHD 5 mm PABBO BB-  
PULPROG zgpg30  
TD 65536  
SOLVENT Pyr  
NS 841  
DS 2  
SWH 45454.547 Hz  
FIDRES 0.693581 Hz  
AQ 0.7209570 sec  
RG 9200  
DW 11.000 usec  
DE 6.50 usec  
TE 298.2 K  
D1 2.00000000 sec  
D11 0.03000000 sec  
TD0 1

==== CHANNEL f1 =====  
NUC1 13C  
P1 8.80 usec  
PL1 1.00 dB  
PL1W 83.20243835 W  
SFO1 150.9178993 MHz

==== CHANNEL f2 =====  
CPDPRG2 waltz16  
NUC2 1H  
PCPD2 80.00 usec  
PL2 -4.00 dB  
PL12 13.16 dB  
PL13 16.00 dB  
PL2W 34.70265579 W  
PL12W 0.66736388 W  
PL13W 0.34702653 W  
SFO2 600.1324005 MHz  
SI 32768  
SF 150.9027005 MHz  
WDW EM  
SSB 0  
LB 3.00 Hz  
GB 0  
PC 1.40

1H NMR of Compound 21

AV-600-1H

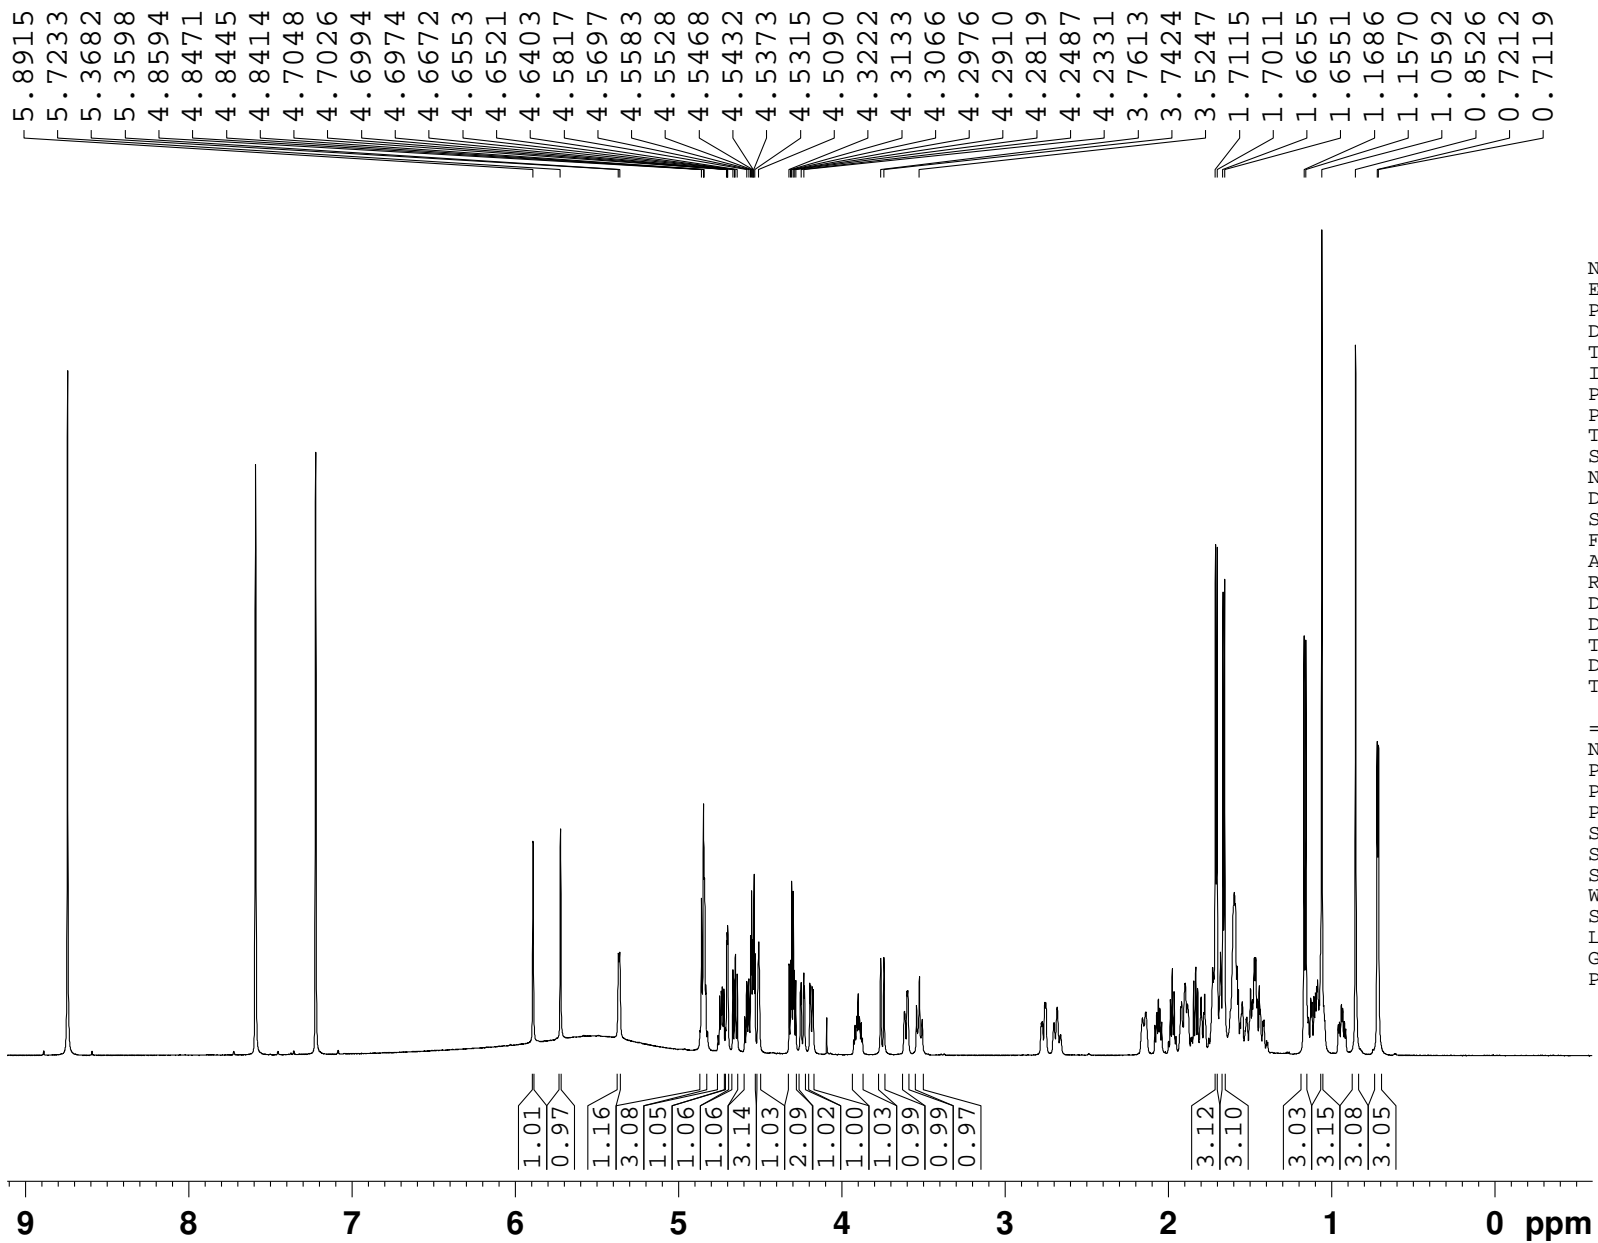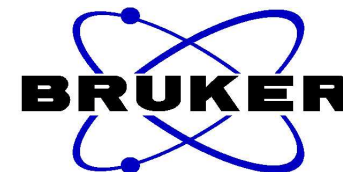

NAME ZP20110406  
EXPNO 1  
PROCNO 1  
Date\_ 20110407  
Time 11.29  
INSTRUM spect  
PROBHD 5 mm PABBO BB-  
PULPROG zg30  
TD 65536  
SOLVENT Pyr  
NS 8  
DS 2  
SWH 12019.230 Hz  
FIDRES 0.183399 Hz  
AQ 2.7263892 sec  
RG 144  
DW 41.600 usec  
DE 6.50 usec  
TE 298.2 K  
D1 1.00000000 sec  
TD0 1

===== CHANNEL f1 =====  
NUC1 1H  
P1 11.10 usec  
PL1 -4.00 dB  
PL1W 34.70265579 W  
SF01 600.1324005 MHz  
SI 32768  
SF 600.1299728 MHz  
WDW EM  
SSB 0  
LB 0.30 Hz  
GB 0  
PC 1.00



13C NMR of Compound 21

AV-600-13C

Sample:

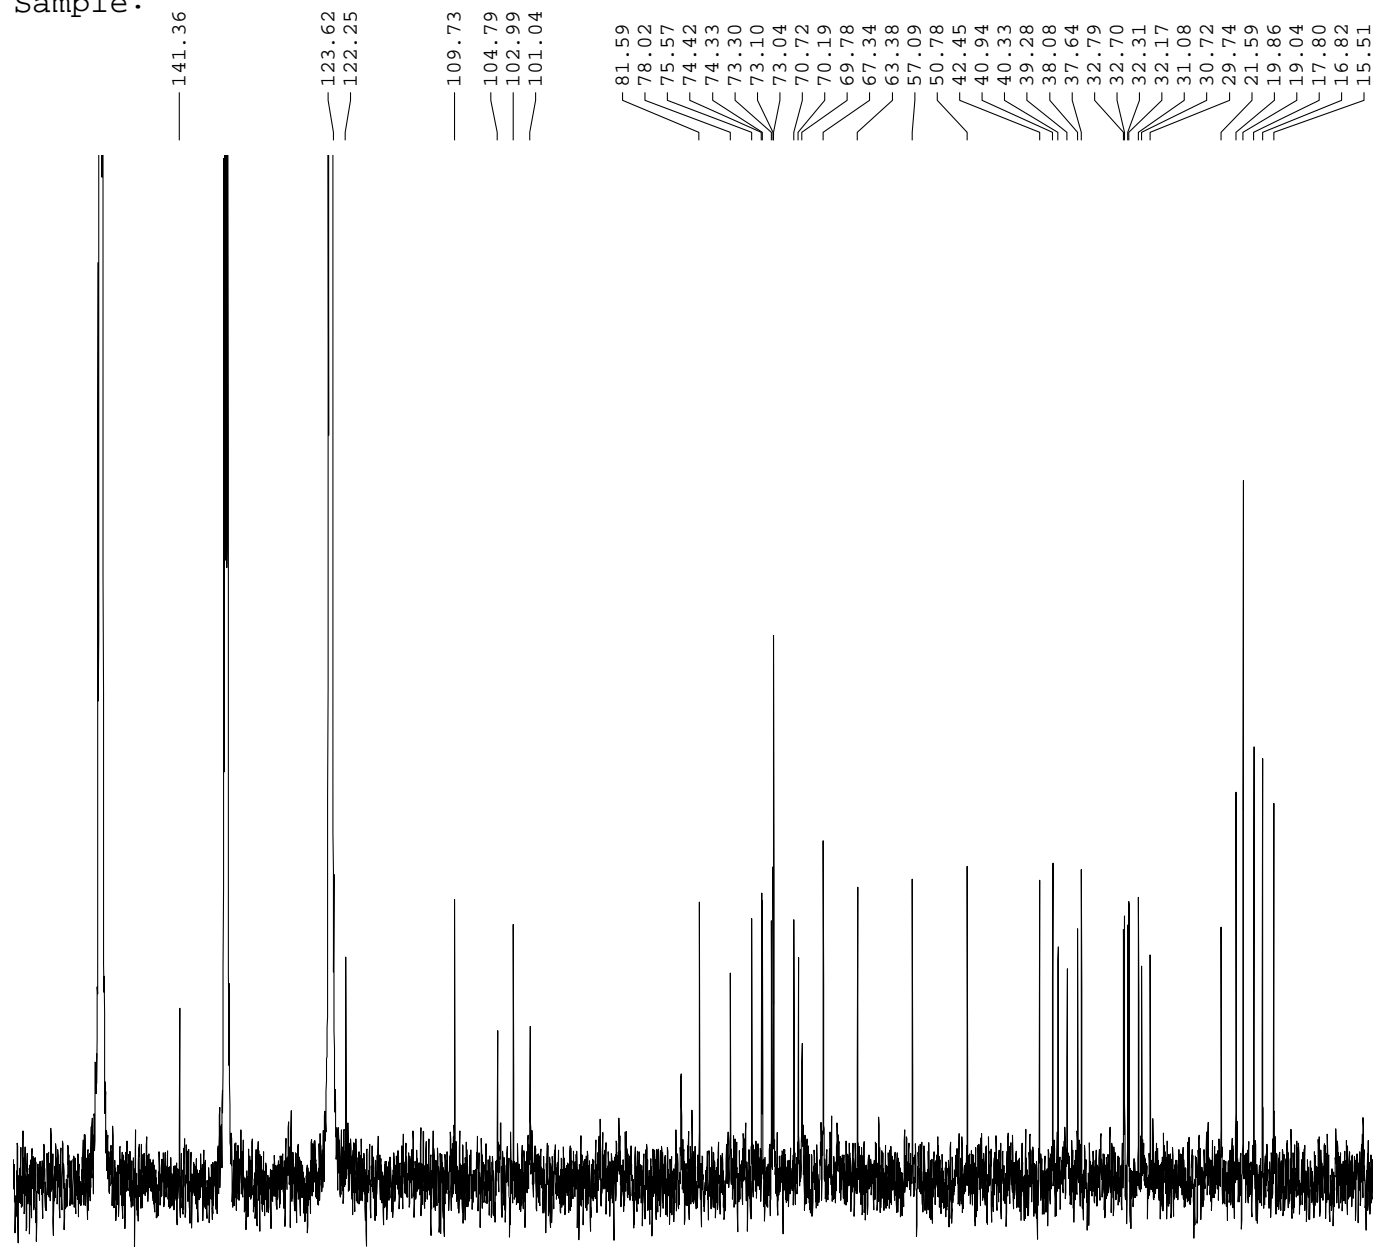

```
NAME ZP20110406
EXPNO 2
PROCNO 1
Date_ 20110407
Time 11.35
INSTRUM spect
PROBHD 5 mm PABBO BB-
PULPROG zgpg30
TD 65536
SOLVENT Pyr
NS 231
DS 2
SWH 45454.547 Hz
FIDRES 0.693581 Hz
AQ 0.7209570 sec
RG 9200
DW 11.000 usec
DE 6.50 usec
TE 298.2 K
D1 2.00000000 sec
D11 0.03000000 sec
TD0 1
```

```
===== CHANNEL f1 =====
NUC1 13C
P1 8.80 usec
PL1 1.00 dB
PL1W 83.20243835 W
SFO1 150.9178993 MHz
```

```
===== CHANNEL f2 =====
CPDPRG2 waltz16
NUC2 1H
PCPD2 80.00 usec
PL2 -4.00 dB
PL12 13.16 dB
PL13 16.00 dB
PL2W 34.70265579 W
PL12W 0.66736388 W
PL13W 0.34702653 W
SFO2 600.1324005 MHz
SI 32768
SF 150.9027002 MHz
WDW EM
SSB 0
LB 3.00 Hz
GB 0
PC 1.40
```

150 140 130 120 110 100 90 80 70 60 50 40 30 20 10 0 ppm

AV-600-1H

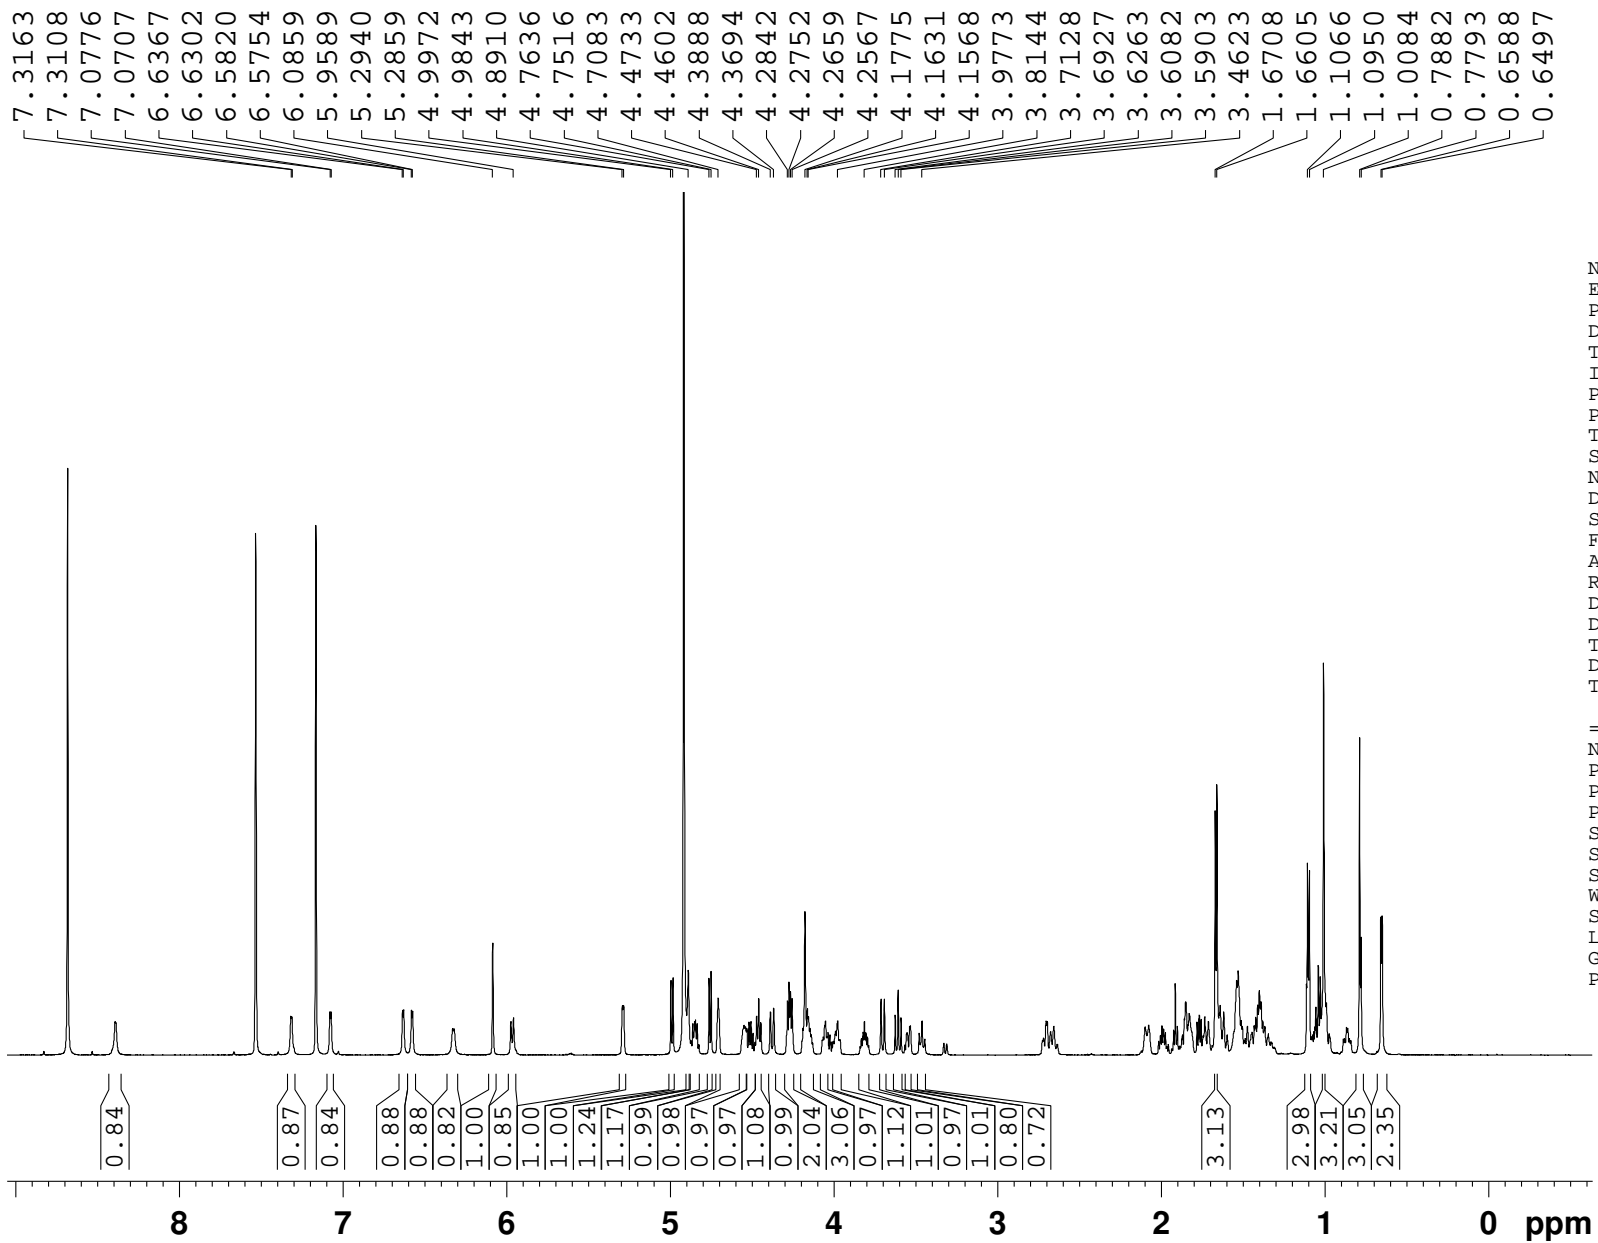

NAME ZP20110412B  
EXPNO 1  
PROCNO 1  
Date\_ 20110413  
Time 9.37  
INSTRUM spect  
PROBHD 5 mm PABBO BB-  
PULPROG zg30  
TD 65536  
SOLVENT Pyr  
NS 8  
DS 2  
SWH 12019.230 Hz  
FIDRES 0.183399 Hz  
AQ 2.7263892 sec  
RG 456  
DW 41.600 usec  
DE 6.50 usec  
TE 298.2 K  
D1 1.00000000 sec  
TD0 1

===== CHANNEL f1 =====  
NUC1 1H  
P1 11.10 usec  
PL1 -4.00 dB  
PL1W 34.70265579 W  
SF01 600.1324005 MHz  
SI 32768  
SF 600.1300086 MHz  
WDW EM  
SSB 0  
LB 0.30 Hz  
GB 0  
PC 1.00

<sup>13</sup>C NMR of Compound 22

AV-600-13C

Sample:

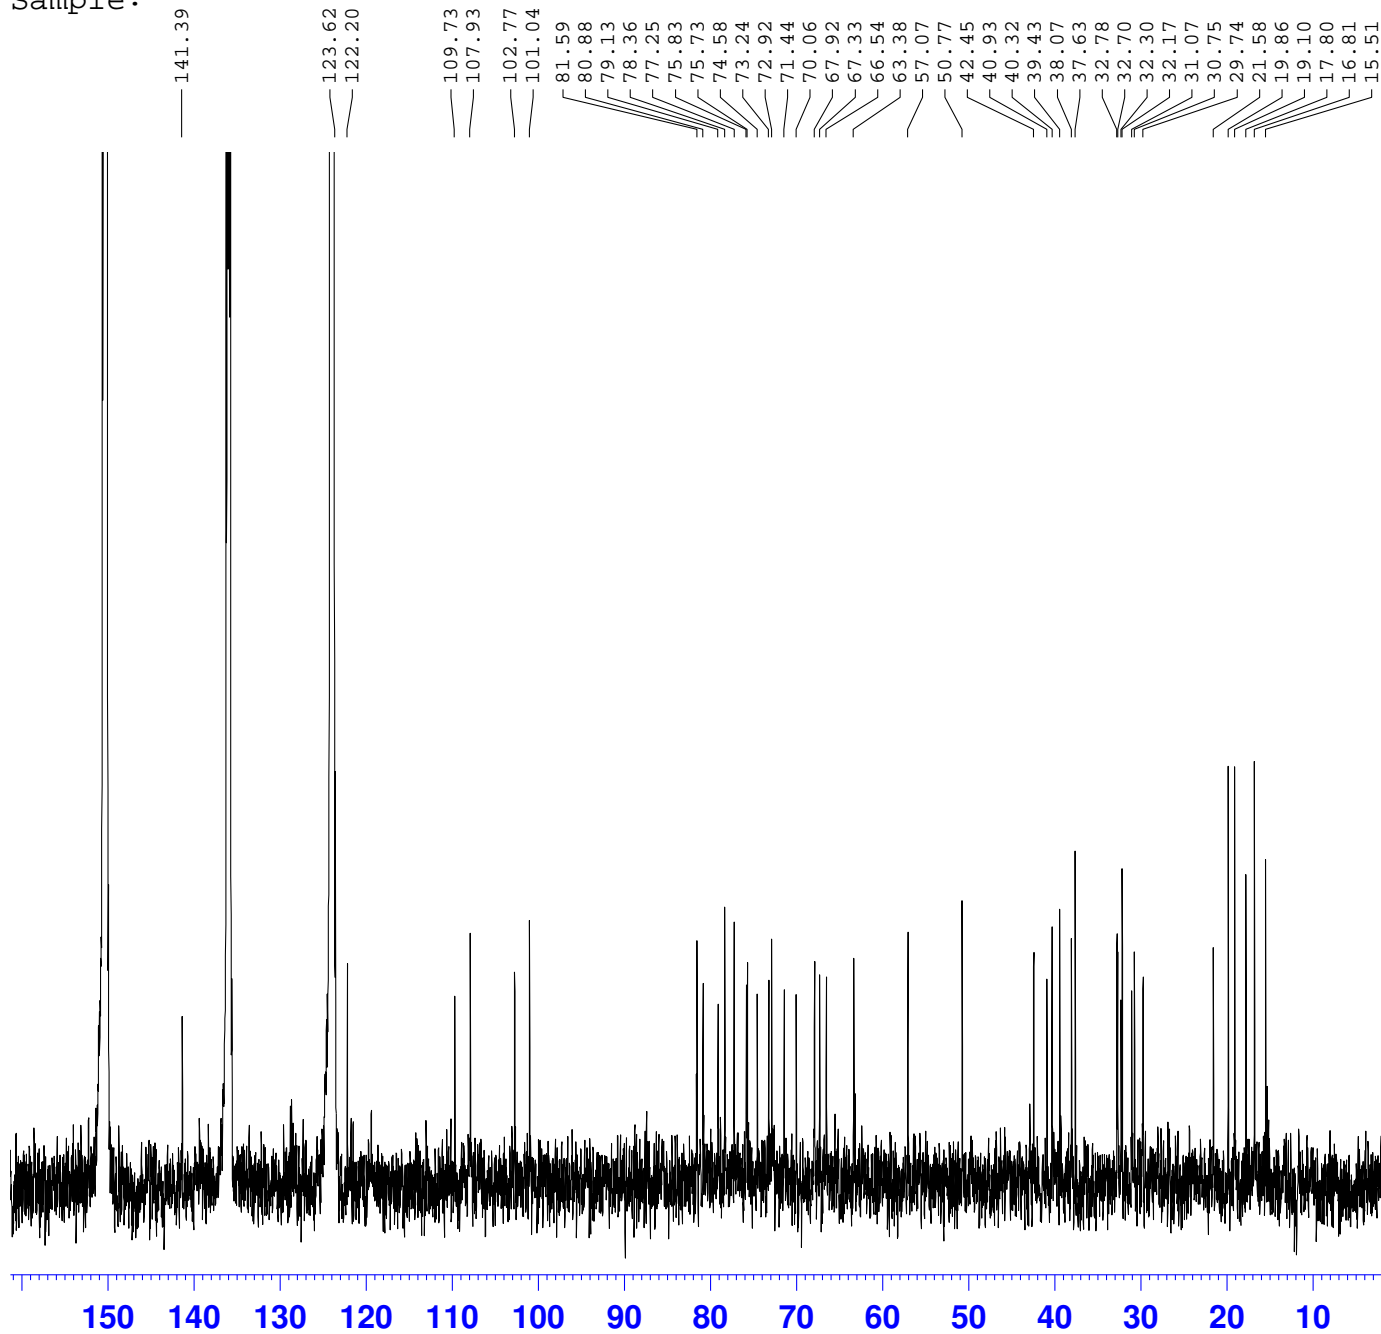

```
NAME          ZP20110412B
EXPNO         2
PROCNO       1
Date_        20110413
Time         9.52
INSTRUM      spect
PROBHD       5 mm PABBO BB-
PULPROG      zgpg30
TD           65536
SOLVENT      Pyr
NS           507
DS           2
SWH          45454.547 Hz
FIDRES       0.693581 Hz
AQ           0.7209570 sec
RG           9200
DW           11.000 usec
DE           6.50 usec
TE           298.2 K
D1           2.00000000 sec
D11          0.03000000 sec
TD0          1
```

```
===== CHANNEL f1 =====
NUC1          13C
P1            8.80 usec
PL1           1.00 dB
PL1W          83.20243835 W
SFO1          150.9178993 MHz
```

```
===== CHANNEL f2 =====
CPDPRG2      waltz16
NUC2          1H
PCPD2        80.00 usec
PL2          -4.00 dB
PL12         13.16 dB
PL13         16.00 dB
PL2W         34.70265579 W
PL12W        0.66736388 W
PL13W        0.34702653 W
SFO2         600.1324005 MHz
SI           32768
SF           150.9027005 MHz
WDW          EM
SSB          0
LB           3.00 Hz
GB           0
PC           1.40
```

1H NMR of Compound 23

AV-600-1H

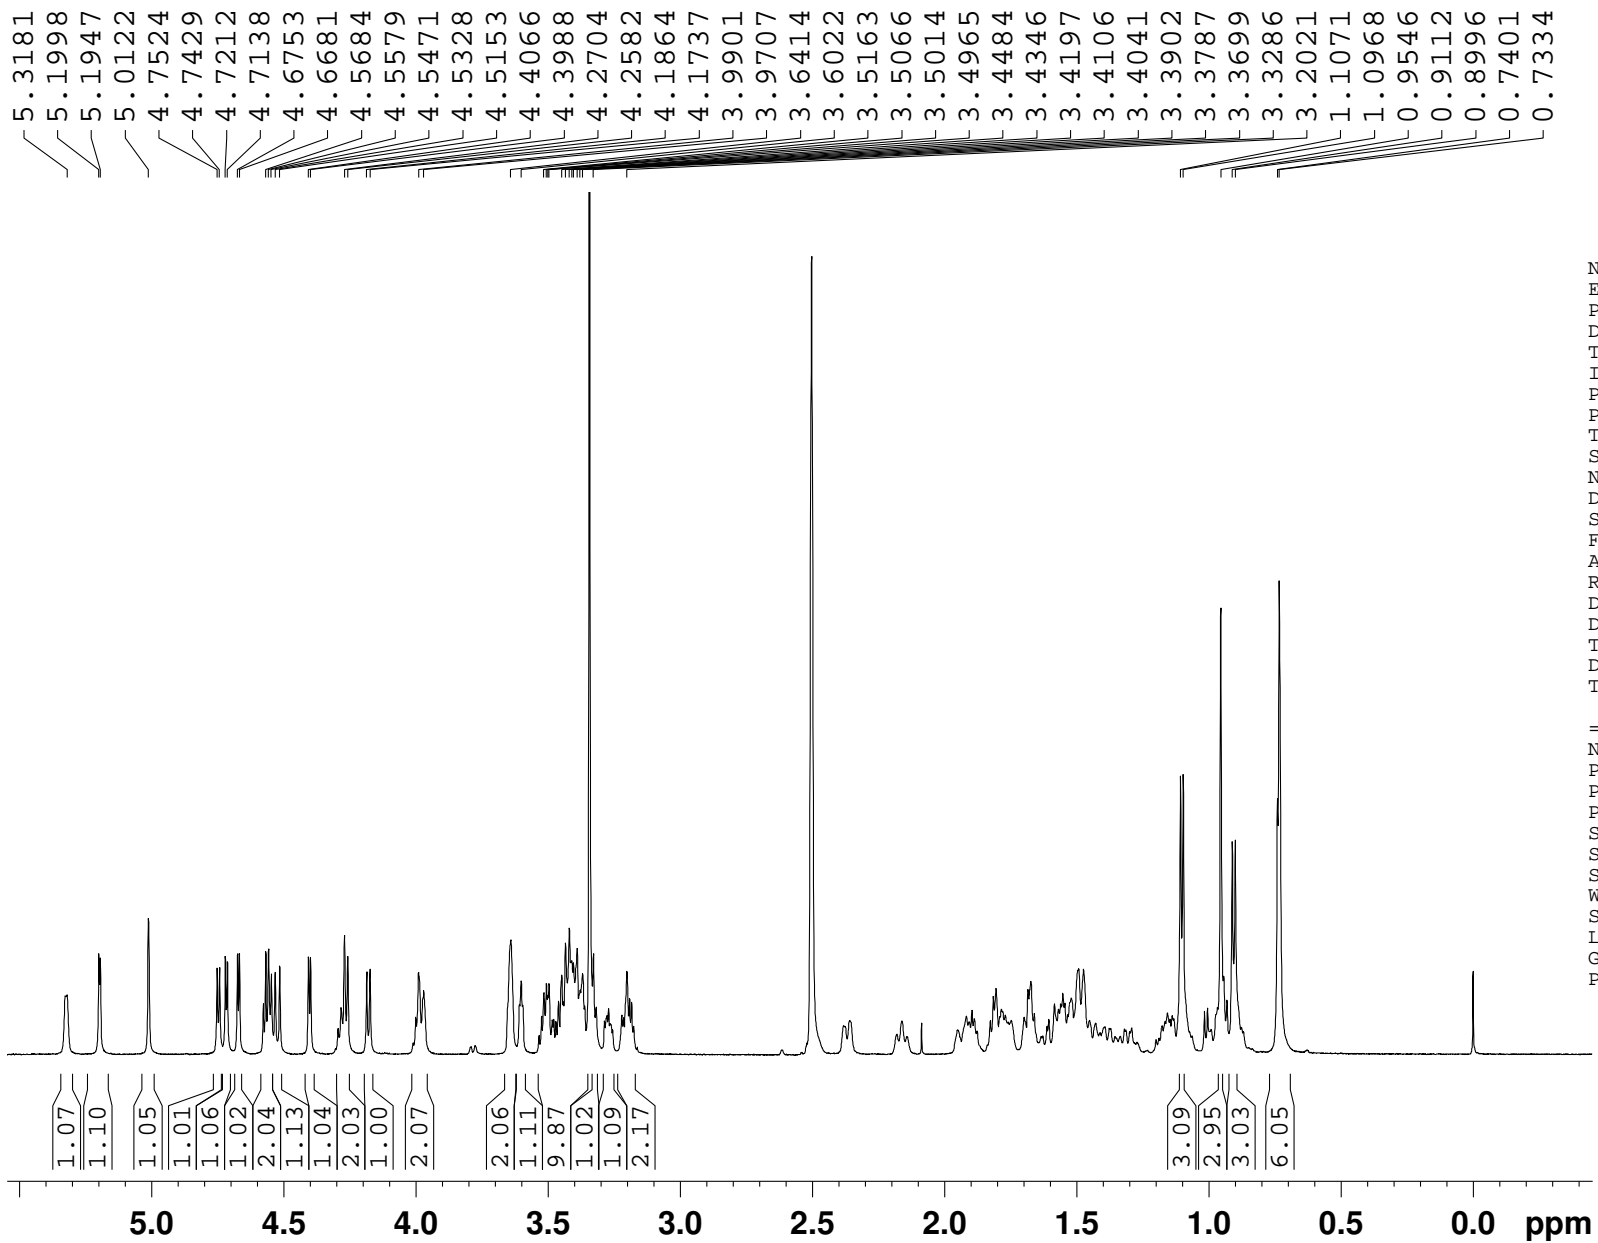

NAME ZP20110310  
EXPNO 1  
PROCNO 1  
Date\_ 20110311  
Time 9.40  
INSTRUM spect  
PROBHD 5 mm PABBO BB-  
PULPROG zg30  
TD 65536  
SOLVENT DMSO  
NS 8  
DS 2  
SWH 17985.611 Hz  
FIDRES 0.274439 Hz  
AQ 1.8219786 sec  
RG 228  
DW 27.800 usec  
DE 6.50 usec  
TE 293.2 K  
D1 1.00000000 sec  
TD0 1

===== CHANNEL f1 =====  
NUC1 1H  
P1 11.10 usec  
PL1 -4.00 dB  
PL1W 34.70265579 W  
SF01 600.1324005 MHz  
SI 32768  
SF 600.1299976 MHz  
WDW EM  
SSB 0  
LB 0.30 Hz  
GB 0  
PC 1.00

13C NMR of Compound 23

AV-600-13C

Sample:

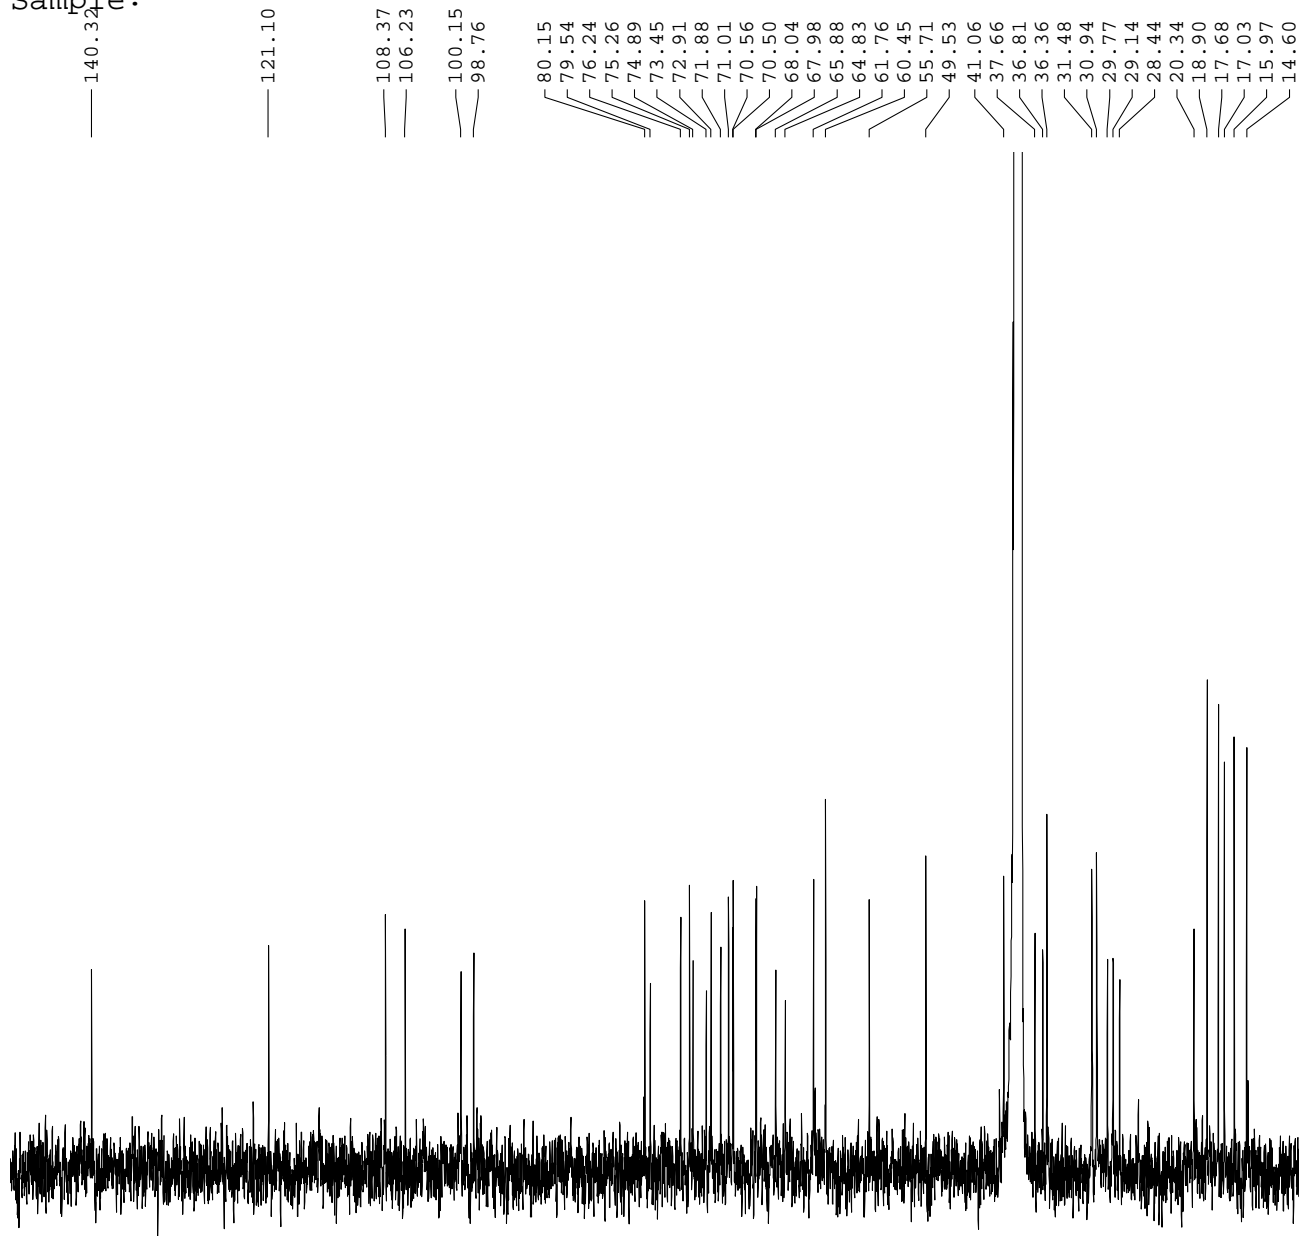

```
NAME          ZP20110310
EXPNO          2
PROCNO         1
Date_          20110318
Time           16.13
INSTRUM        spect
PROBHD         5 mm PABBO BB-
PULPROG        zgpg30
TD             65536
SOLVENT        DMSO
NS             2110
DS             2
SWH            45454.547 Hz
FIDRES         0.693581 Hz
AQ            0.7209570 sec
RG            9200
DW            11.000 usec
DE            6.50 usec
TE            300.2 K
D1            2.00000000 sec
D11           0.03000000 sec
TD0           1
```

```
===== CHANNEL f1 =====
NUC1           13C
P1             8.80 usec
PL1           1.00 dB
PL1W          83.20243835 W
SFO1          150.9178993 MHz
```

```
===== CHANNEL f2 =====
CPDPRG2       waltz16
NUC2           1H
PCPD2         80.00 usec
PL2           -4.00 dB
PL12          13.16 dB
PL13          16.00 dB
PL2W          34.70265579 W
PL12W         0.66736388 W
PL13W         0.34702653 W
SFO2          600.1324005 MHz
SI            32768
SF            150.9028846 MHz
WDW           EM
SSB           0
LB            3.00 Hz
GB            0
PC            1.40
```

140 130 120 110 100 90 80 70 60 50 40 30 20 10 0 ppm

1H NMR of Compound 24

AV-600-1H

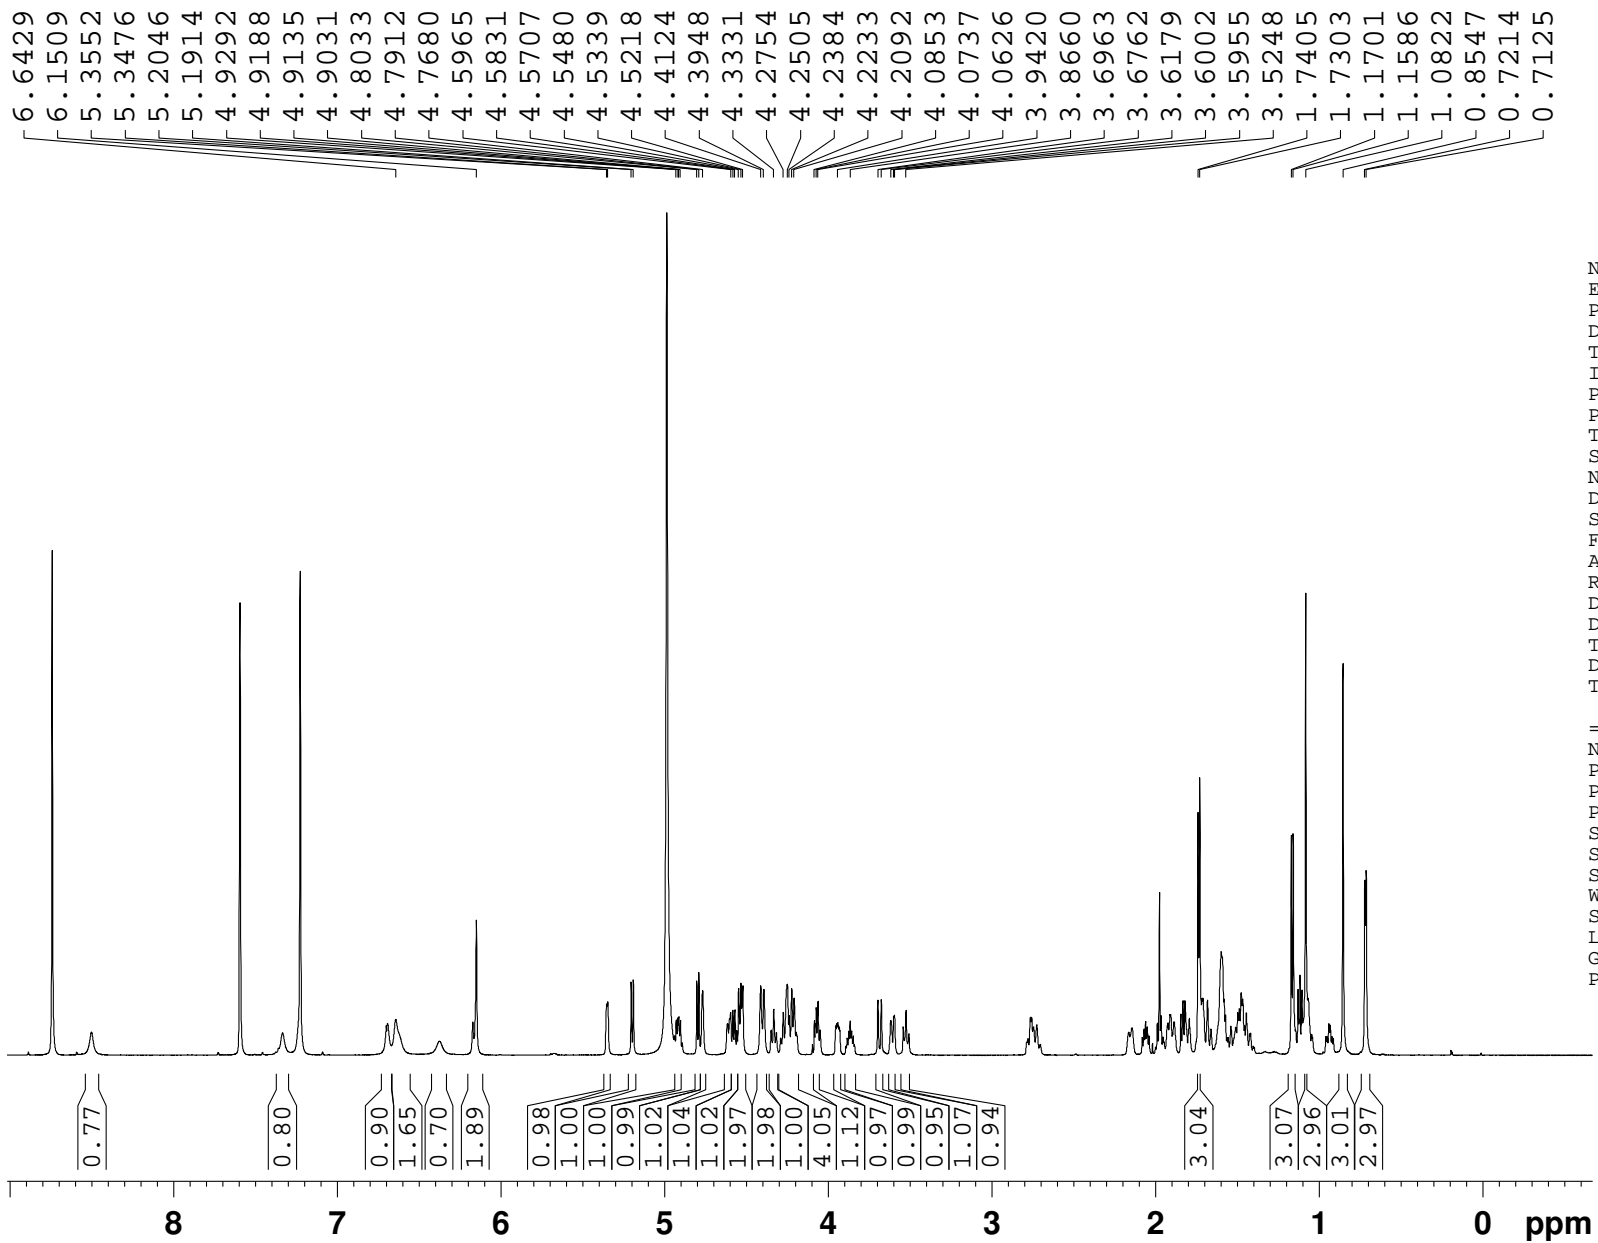

NAME ZP20110412C  
EXPNO 1  
PROCNO 1  
Date\_ 20110413  
Time 9.01  
INSTRUM spect  
PROBHD 5 mm PABBO BB-  
PULPROG zg30  
TD 65536  
SOLVENT Pyr  
NS 8  
DS 2  
SWH 12019.230 Hz  
FIDRES 0.183399 Hz  
AQ 2.7263892 sec  
RG 456  
DW 41.600 usec  
DE 6.50 usec  
TE 298.2 K  
D1 1.00000000 sec  
TD0 1

===== CHANNEL f1 =====  
NUC1 1H  
P1 11.10 usec  
PL1 -4.00 dB  
PL1W 34.70265579 W  
SF01 600.1324005 MHz  
SI 32768  
SF 600.1299730 MHz  
WDW EM  
SSB 0  
LB 0.30 Hz  
GB 0  
PC 1.00

<sup>13</sup>C NMR of Compound 24

AV-600-13C

Sample:

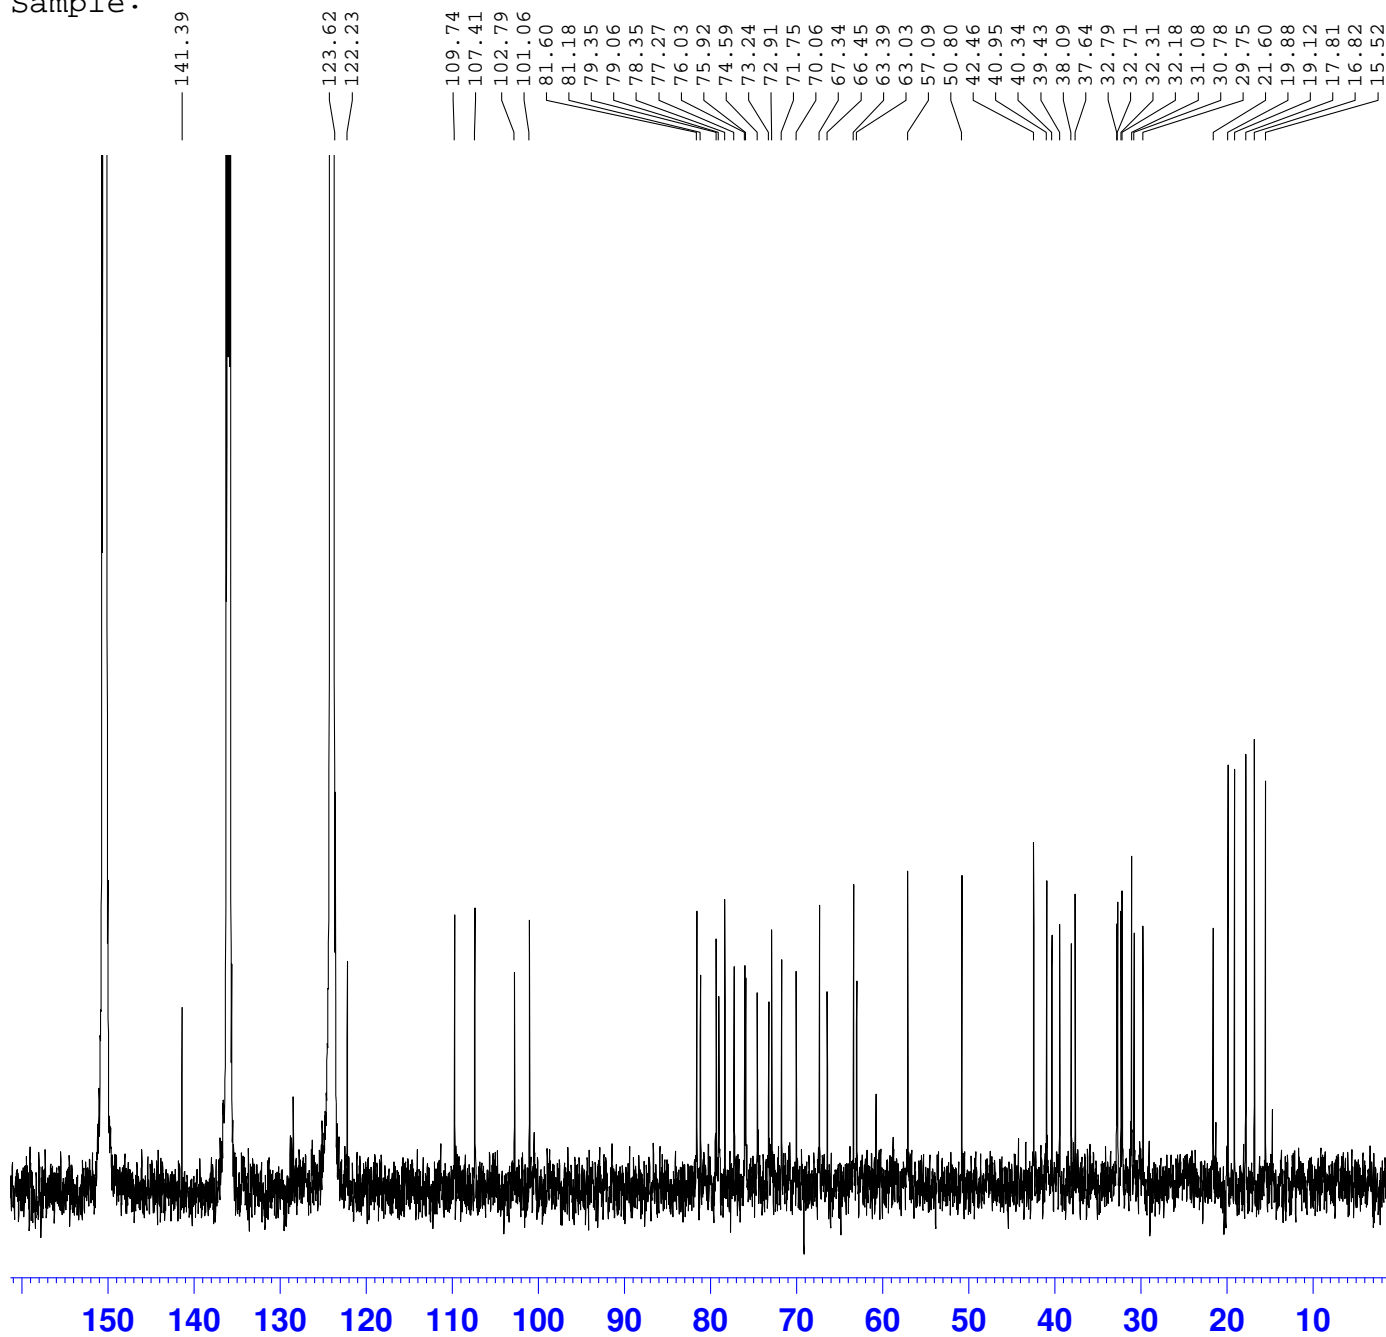

```
NAME          ZP20110412C
EXPNO         2
PROCNO        1
Date_         20110413
Time          9.34
INSTRUM       spect
PROBHD        5 mm PABBO BB-
PULPROG       zgpg30
TD            65536
SOLVENT       Pyr
NS            672
DS            2
SWH           45454.547 Hz
FIDRES        0.693581 Hz
AQ            0.7209570 sec
RG            9200
DW            11.000 usec
DE            6.50 usec
TE            298.2 K
D1            2.00000000 sec
D11           0.03000000 sec
TD0           1
```

```
===== CHANNEL f1 =====
NUC1           13C
P1             8.80 usec
PL1            1.00 dB
PL1W           83.20243835 W
SFO1           150.9178993 MHz
```

```
===== CHANNEL f2 =====
CPDPRG2       waltz16
NUC2           1H
PCPD2         80.00 usec
PL2            -4.00 dB
PL12           13.16 dB
PL13           16.00 dB
PL2W           34.70265579 W
PL12W          0.66736388 W
PL13W          0.34702653 W
SFO2           600.1324005 MHz
SI             32768
SF             150.9026996 MHz
WDW            EM
SSB            0
LB             3.00 Hz
GB             0
PC             1.40
```

<sup>1</sup>H NMR of Compound 25

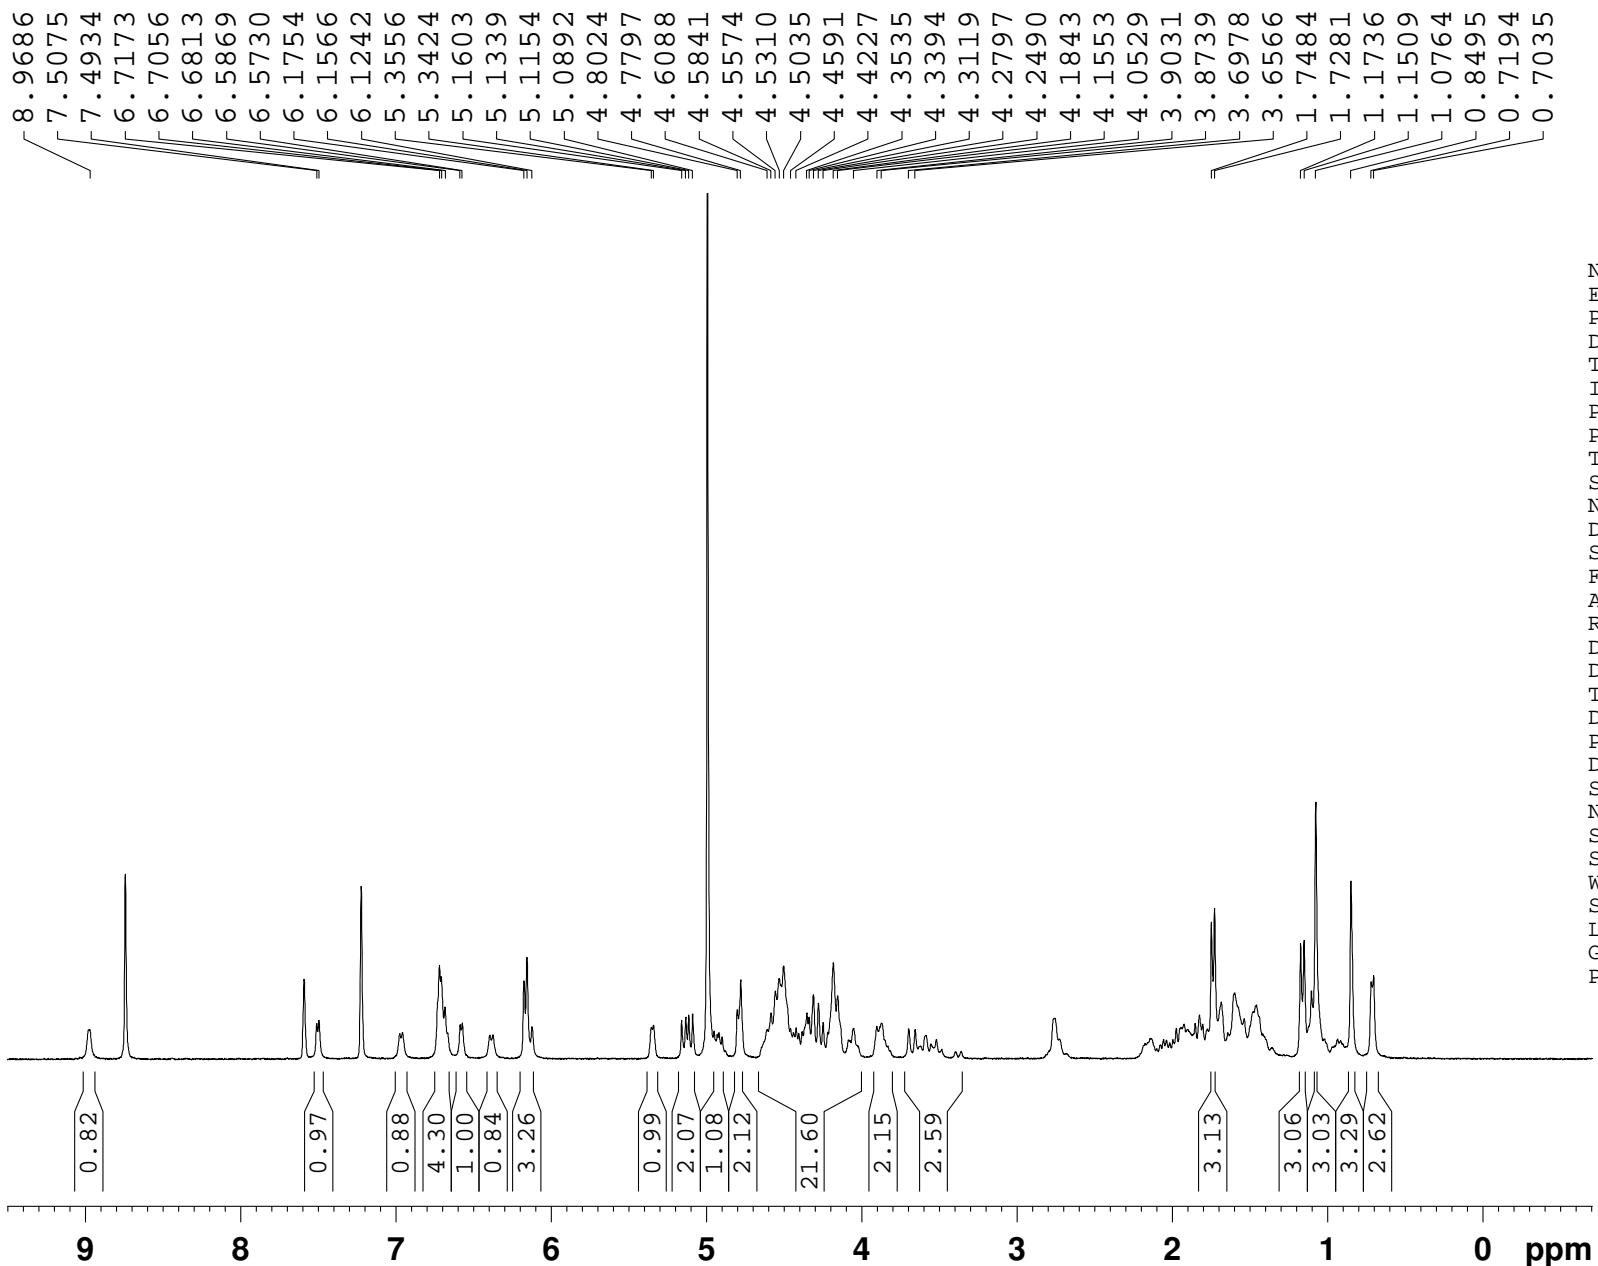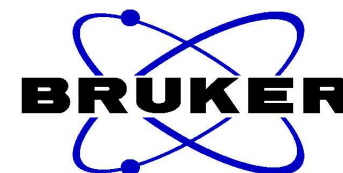

NAME ZP20110414  
EXPNO 1  
PROCNO 1  
Date\_ 20110415  
Time 5.53  
INSTRUM arx300  
PROBHD 5 mm QNP 1H  
PULPROG zg30  
TD 32768  
SOLVENT Pyr  
NS 16  
DS 2  
SWH 6024.096 Hz  
FIDRES 0.183841 Hz  
AQ 2.7197940 sec  
RG 2048  
DW 83.000 usec  
DE 118.57 usec  
TE 300.0 K  
D1 1.00000000 sec  
P1 12.40 usec  
DE 118.57 usec  
SFO1 300.1318534 MHz  
NUCLEUS 1H  
SI 16384  
SF 300.1303307 MHz  
WDW EM  
SSB 0  
LB 0.30 Hz  
GB 0  
PC 1.00



13C NMR of Compound 25

AV-600-13C  
Sample:n\_pram

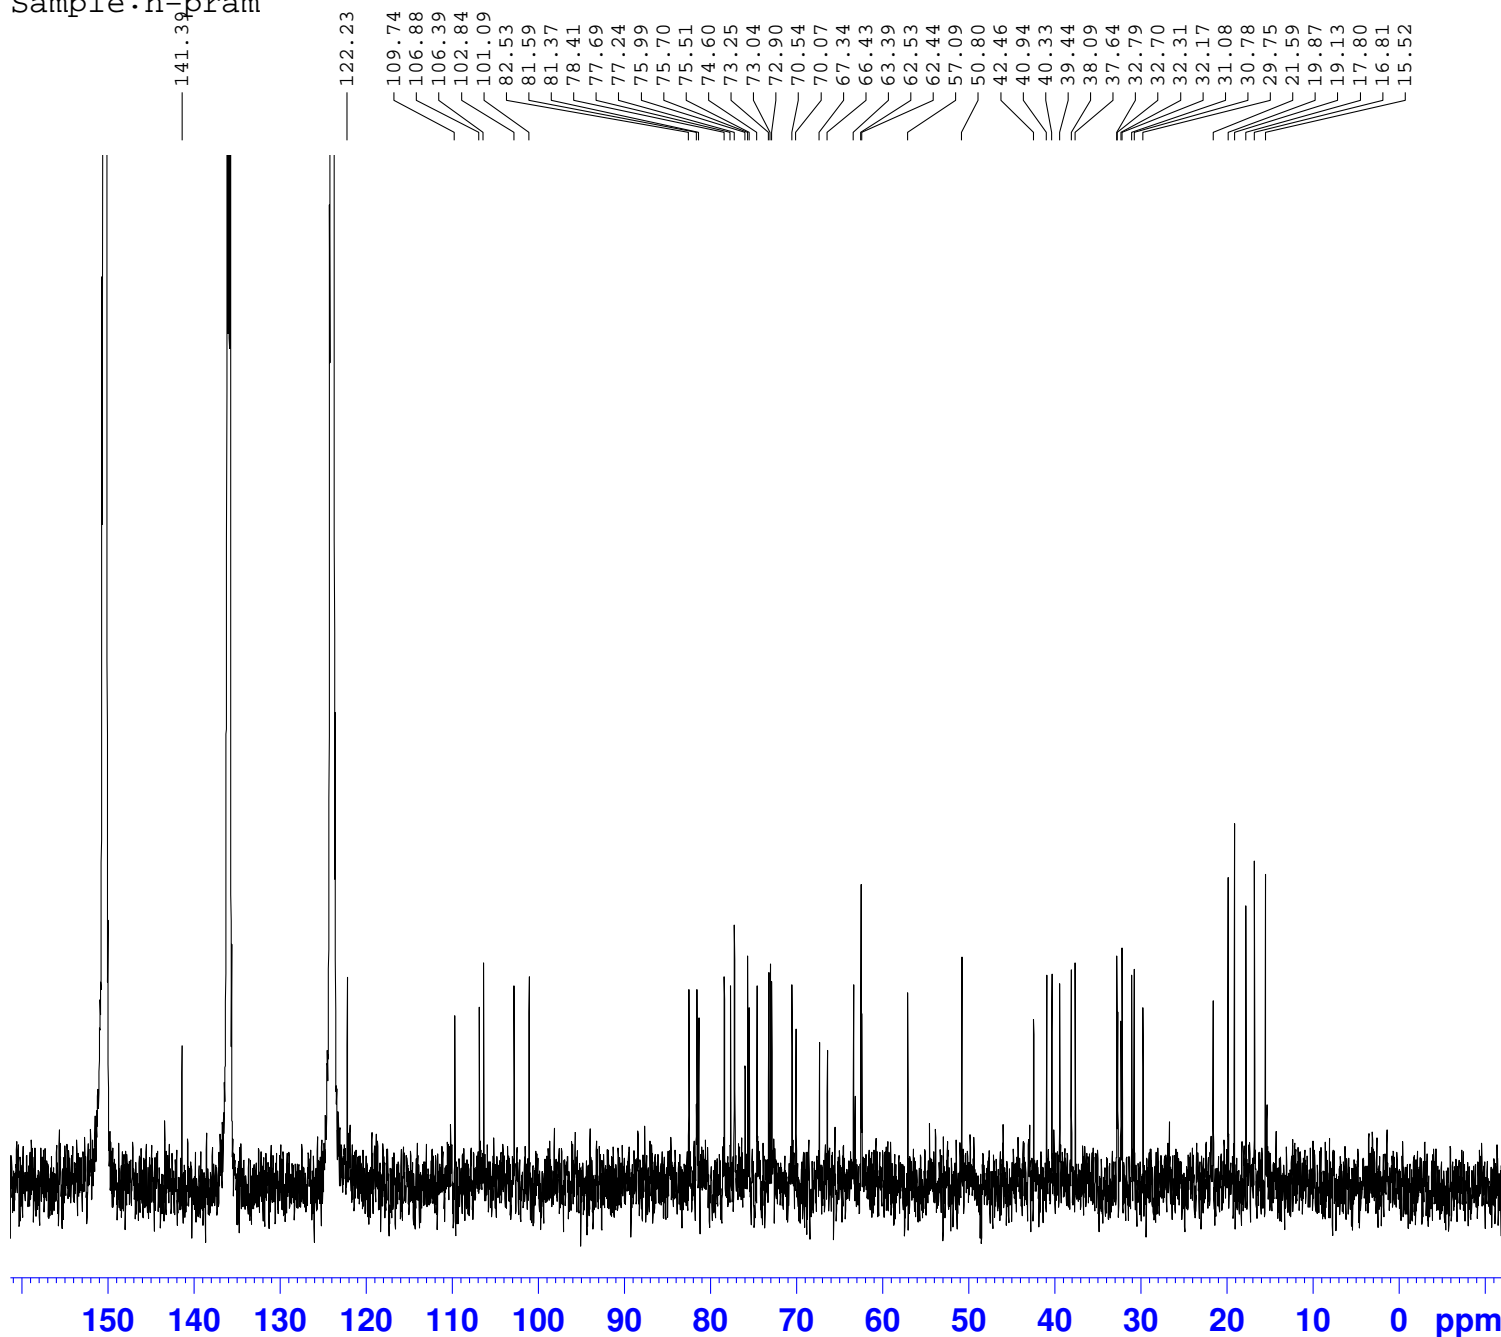

NAME ZP20110414  
EXPNO 2  
PROCNO 1  
Date\_ 20110429  
Time 11.05  
INSTRUM spect  
PROBHD 5 mm PABBO BB-  
PULPROG zgpg30  
TD 65536  
SOLVENT Pyr  
NS 522  
DS 2  
SWH 45454.547 Hz  
FIDRES 0.693581 Hz  
AQ 0.7209570 sec  
RG 9200  
DW 11.000 usec  
DE 6.50 usec  
TE 298.2 K  
D1 2.00000000 sec  
D11 0.03000000 sec  
TD0 1

==== CHANNEL f1 =====  
NUC1 13C  
P1 8.80 usec  
PL1 1.00 dB  
PL1W 83.20243835 W  
SFO1 150.9178993 MHz

==== CHANNEL f2 =====  
CPDPRG2 waltz16  
NUC2 1H  
PCPD2 80.00 usec  
PL2 -4.00 dB  
PL12 13.16 dB  
PL13 16.00 dB  
PL2W 34.70265579 W  
PL12W 0.66736388 W  
PL13W 0.34702653 W  
SFO2 600.1324005 MHz  
SI 32768  
SF 150.9026996 MHz  
WDW EM  
SSB 0  
LB 3.00 Hz  
GB 0  
PC 1.40

AV-600-1H

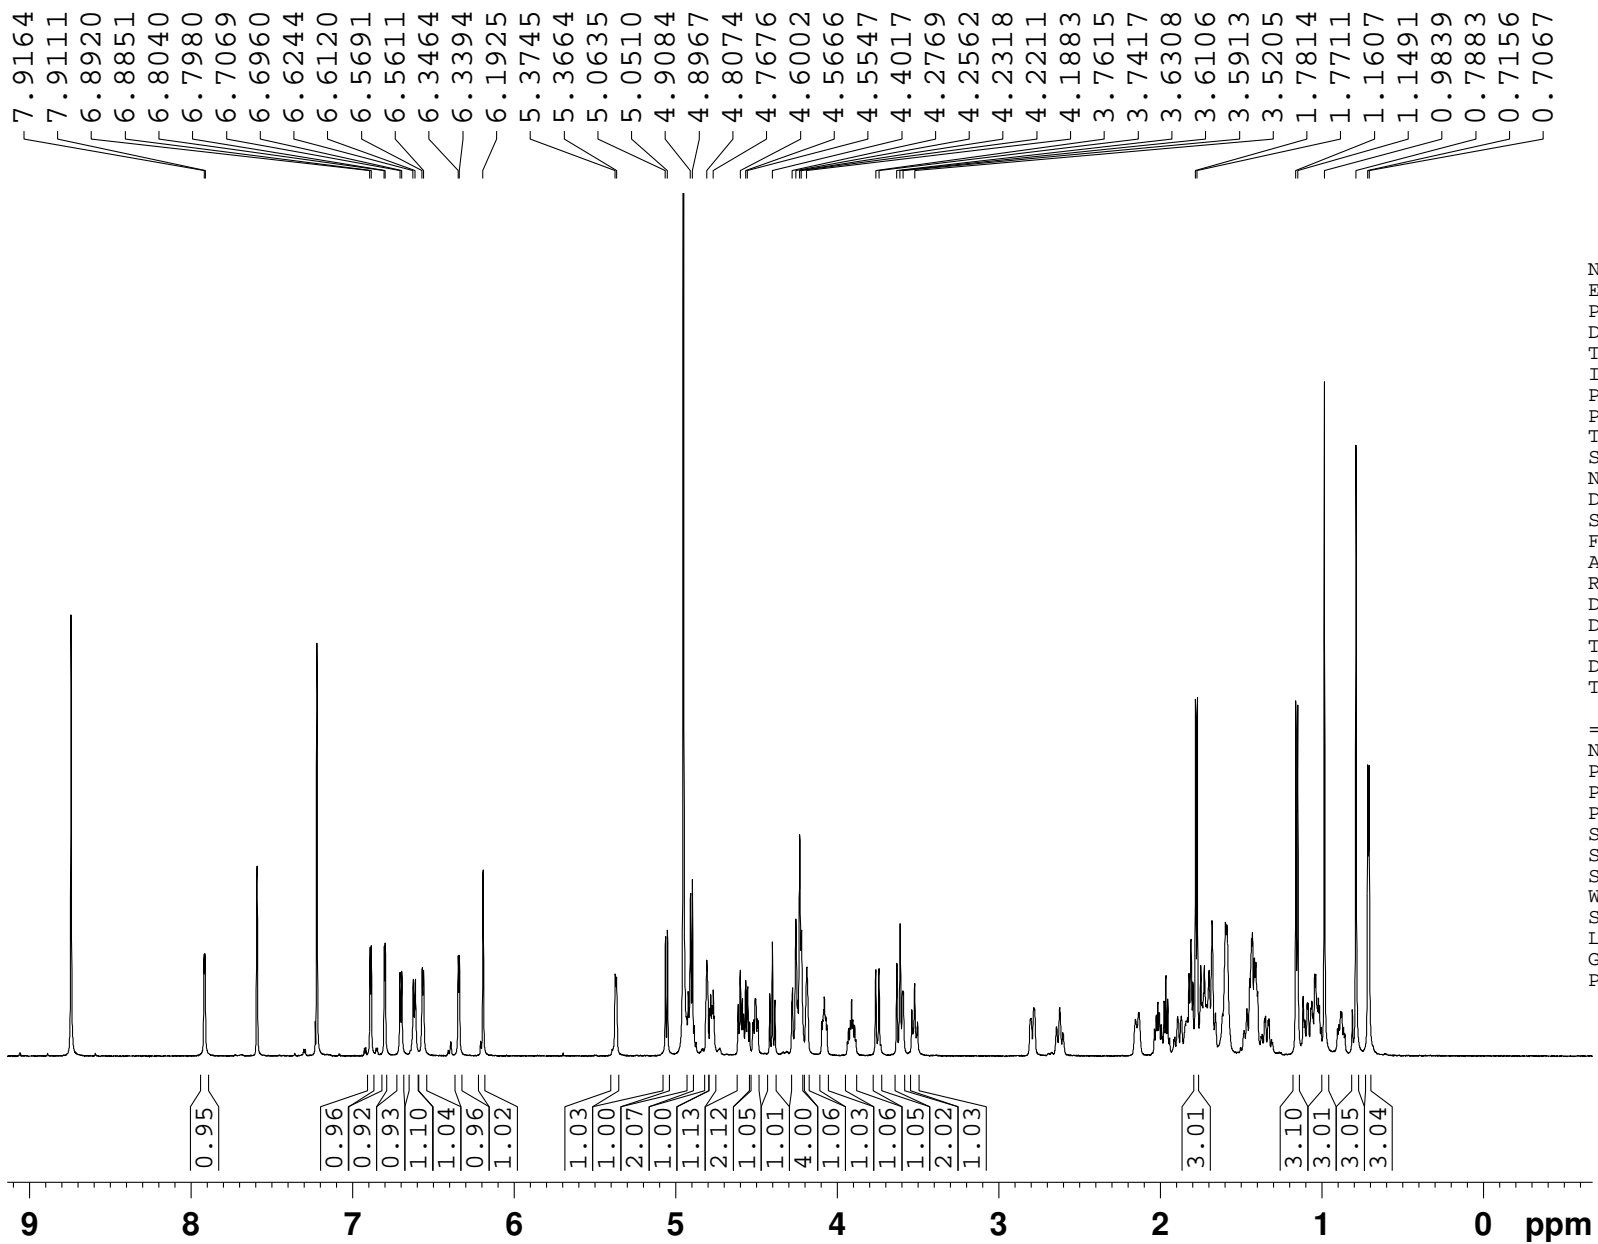

NAME ZP20110415A  
EXPNO 1  
PROCNO 1  
Date\_ 20110415  
Time 15.10  
INSTRUM spect  
PROBHD 5 mm PABBO BB-  
PULPROG zg30  
TD 65536  
SOLVENT Pyr  
NS 8  
DS 2  
SWH 12019.230 Hz  
FIDRES 0.183399 Hz  
AQ 2.7263892 sec  
RG 256  
DW 41.600 usec  
DE 6.50 usec  
TE 298.2 K  
D1 1.00000000 sec  
TD0 1

==== CHANNEL f1 =====  
NUC1 1H  
P1 11.10 usec  
PL1 -4.00 dB  
PL1W 34.70265579 W  
SF01 600.1324005 MHz  
SI 32768  
SF 600.1299729 MHz  
WDW EM  
SSB 0  
LB 0.30 Hz  
GB 0  
PC 1.00

<sup>13</sup>C NMR of Compound 26

AV-600-13C

Sample:

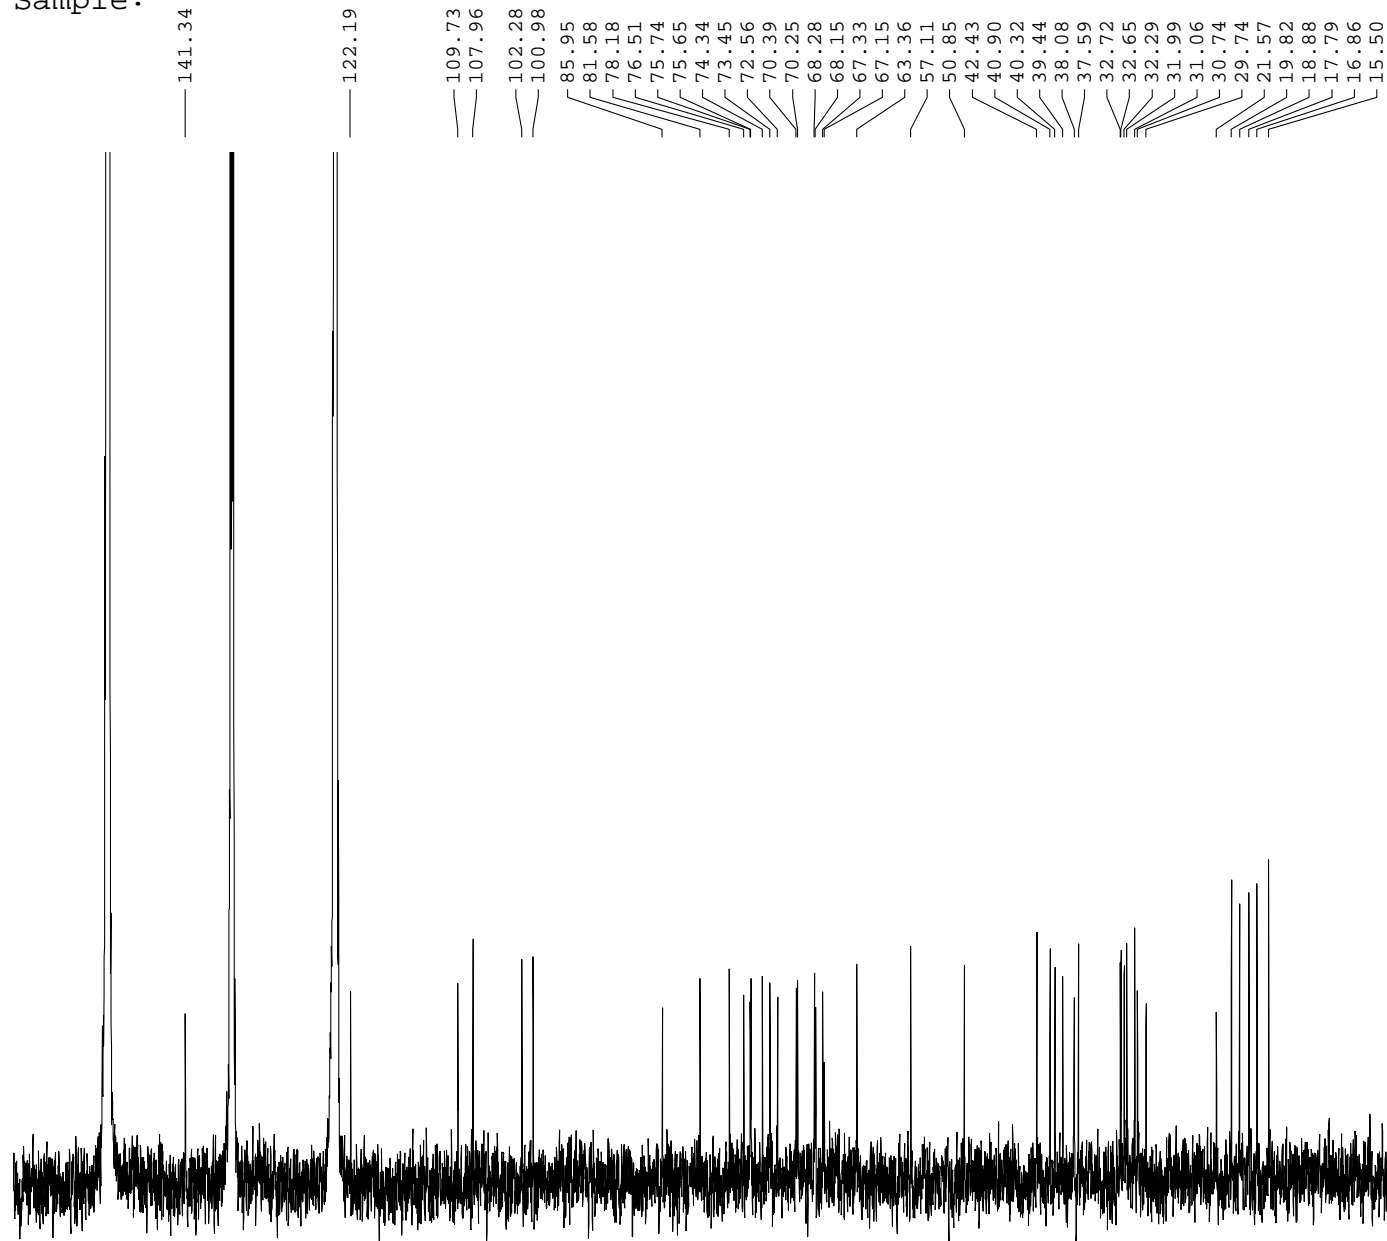

NAME ZP20110415A  
EXPNO 2  
PROCNO 1  
Date\_ 20110419  
Time 8.37  
INSTRUM spect  
PROBHD 5 mm PABBO BB-  
PULPROG zgpg30  
TD 65536  
SOLVENT Pyr  
NS 313  
DS 2  
SWH 45454.547 Hz  
FIDRES 0.693581 Hz  
AQ 0.7209570 sec  
RG 9200  
DW 11.000 usec  
DE 6.50 usec  
TE 298.2 K  
D1 2.00000000 sec  
D11 0.03000000 sec  
TD0 1

==== CHANNEL f1 =====  
NUC1 13C  
P1 8.80 usec  
PL1 1.00 dB  
PL1W 83.20243835 W  
SFO1 150.9178993 MHz

==== CHANNEL f2 =====  
CPDPRG2 waltz16  
NUC2 1H  
PCPD2 80.00 usec  
PL2 -4.00 dB  
PL12 13.16 dB  
PL13 16.00 dB  
PL2W 34.70265579 W  
PL12W 0.66736388 W  
PL13W 0.34702653 W  
SFO2 600.1324005 MHz  
SI 32768  
SF 150.9027010 MHz  
WDW EM  
SSB 0  
LB 3.00 Hz  
GB 0  
PC 1.40

150 140 130 120 110 100 90 80 70 60 50 40 30 20 10 0 ppm

<sup>1</sup>H NMR of Compound 27

AV-600-1H

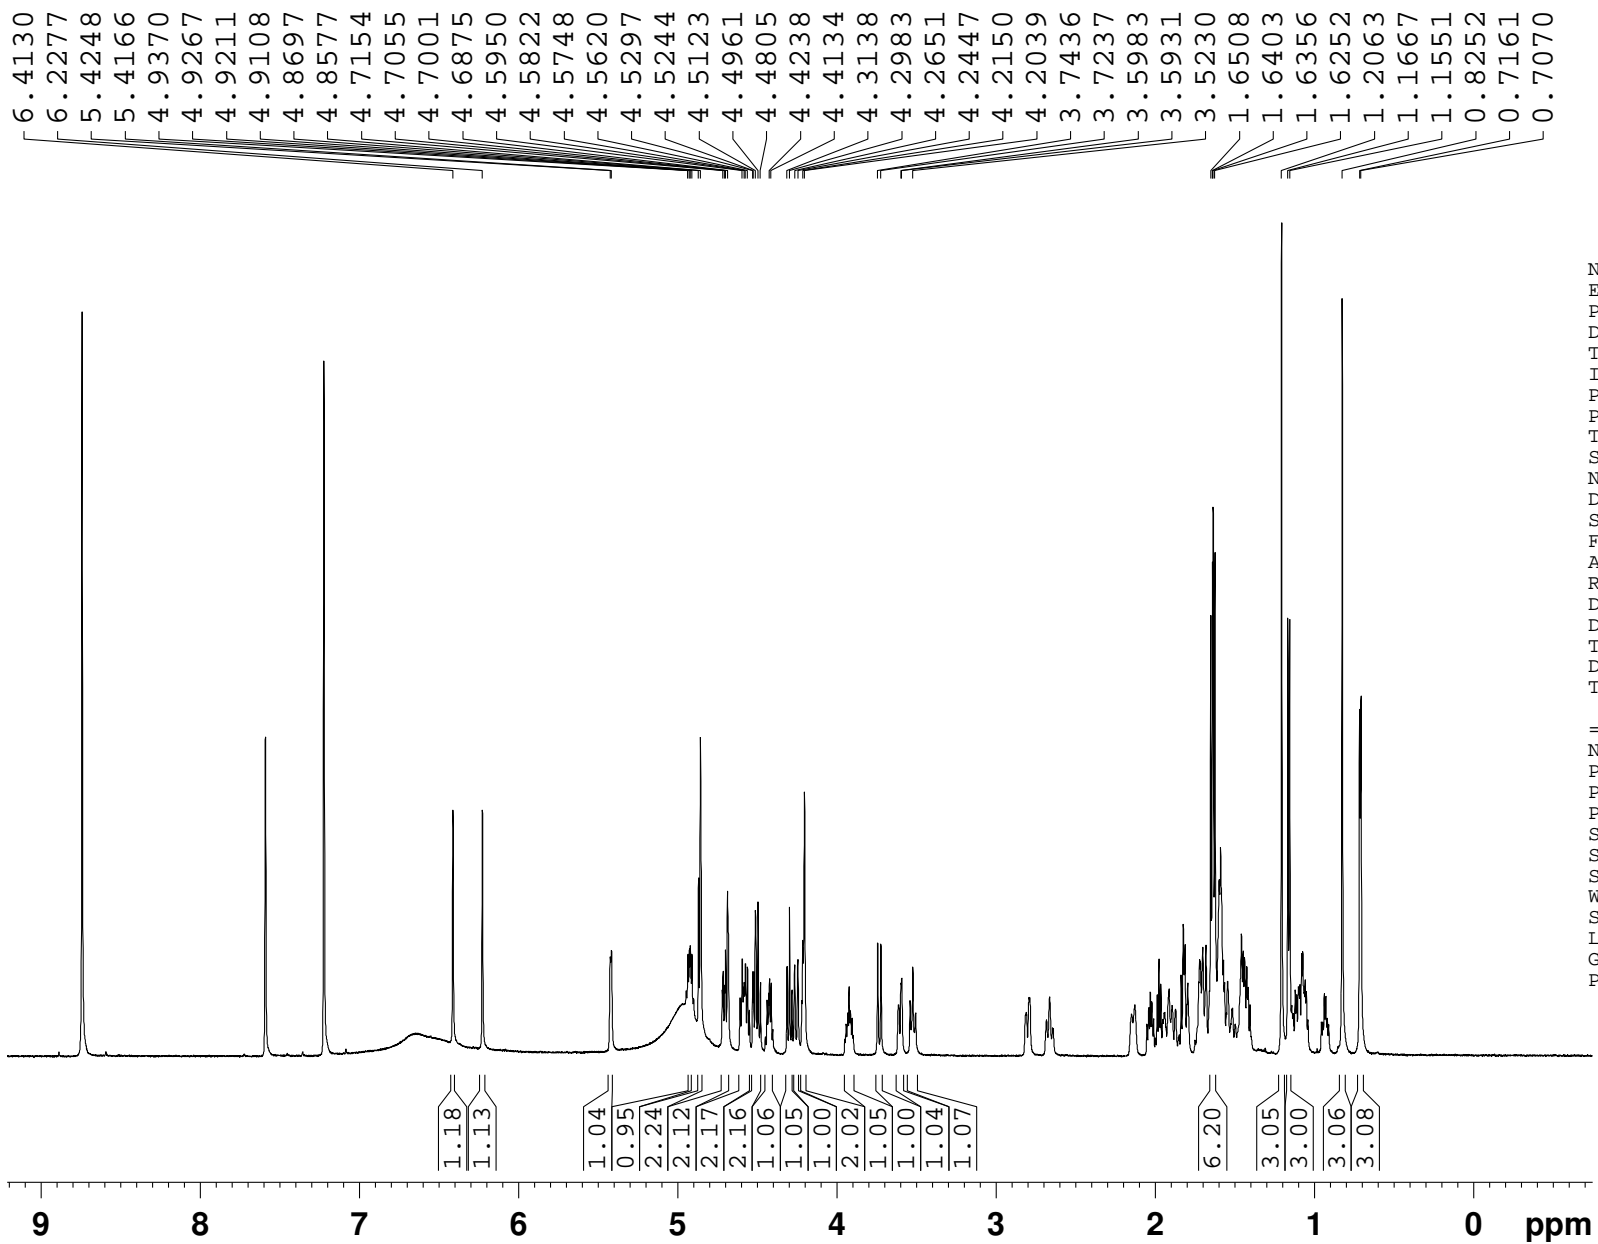

NAME ZP20110415B  
EXPNO 1  
PROCNO 1  
Date\_ 20110415  
Time 15.06  
INSTRUM spect  
PROBHD 5 mm PABBO BB-  
PULPROG zg30  
TD 65536  
SOLVENT Pyr  
NS 8  
DS 2  
SWH 12019.230 Hz  
FIDRES 0.183399 Hz  
AQ 2.7263892 sec  
RG 322  
DW 41.600 usec  
DE 6.50 usec  
TE 298.2 K  
D1 1.00000000 sec  
TD0 1

===== CHANNEL f1 =====  
NUC1 1H  
P1 11.10 usec  
PL1 -4.00 dB  
PL1W 34.70265579 W  
SF01 600.1324005 MHz  
SI 32768  
SF 600.1299730 MHz  
WDW EM  
SSB 0  
LB 0.30 Hz  
GB 0  
PC 1.00

13C NMR of Compound 27

AV-600-13C

Sample:

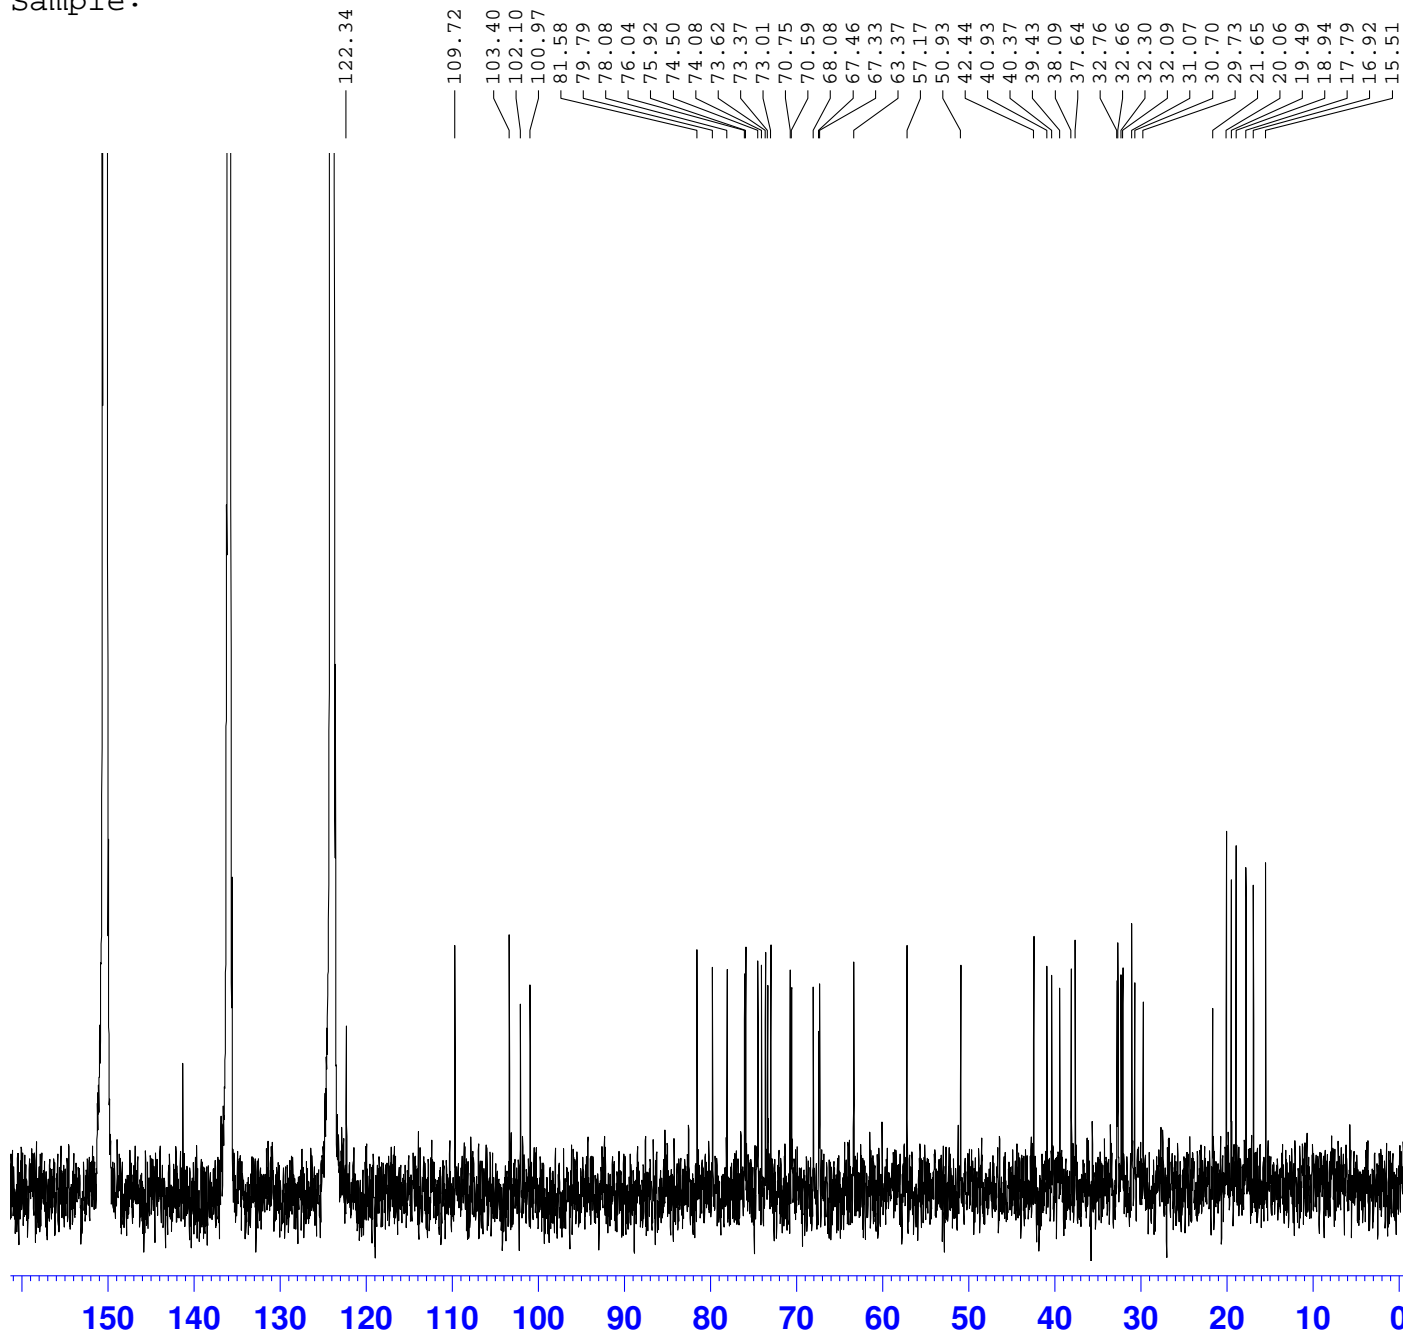

```
NAME          ZP20110415B
EXPNO          2
PROCNO         1
Date_          20110419
Time           14.11
INSTRUM        spect
PROBHD         5 mm PABBO BB-
PULPROG        zgpg30
TD             65536
SOLVENT        Pyr
NS             658
DS             2
SWH            45454.547 Hz
FIDRES         0.693581 Hz
AQ            0.7209570 sec
RG            9200
DW            11.000 usec
DE            6.50 usec
TE            298.2 K
D1            2.00000000 sec
D11           0.03000000 sec
TD0           1
```

```
===== CHANNEL f1 =====
NUC1           13C
P1             8.80 usec
PL1           1.00 dB
PL1W          83.20243835 W
SFO1          150.9178993 MHz
```

```
===== CHANNEL f2 =====
CPDPRG2       waltz16
NUC2           1H
PCPD2         80.00 usec
PL2           -4.00 dB
PL12          13.16 dB
PL13          16.00 dB
PL2W          34.70265579 W
PL12W         0.66736388 W
PL13W         0.34702653 W
SFO2          600.1324005 MHz
SI            32768
SF            150.9028741 MHz
WDW           EM
SSB           0
LB            3.00 Hz
GB           0
PC            1.40
```

<sup>1</sup>H NMR of Compound 28

AV-600-1H

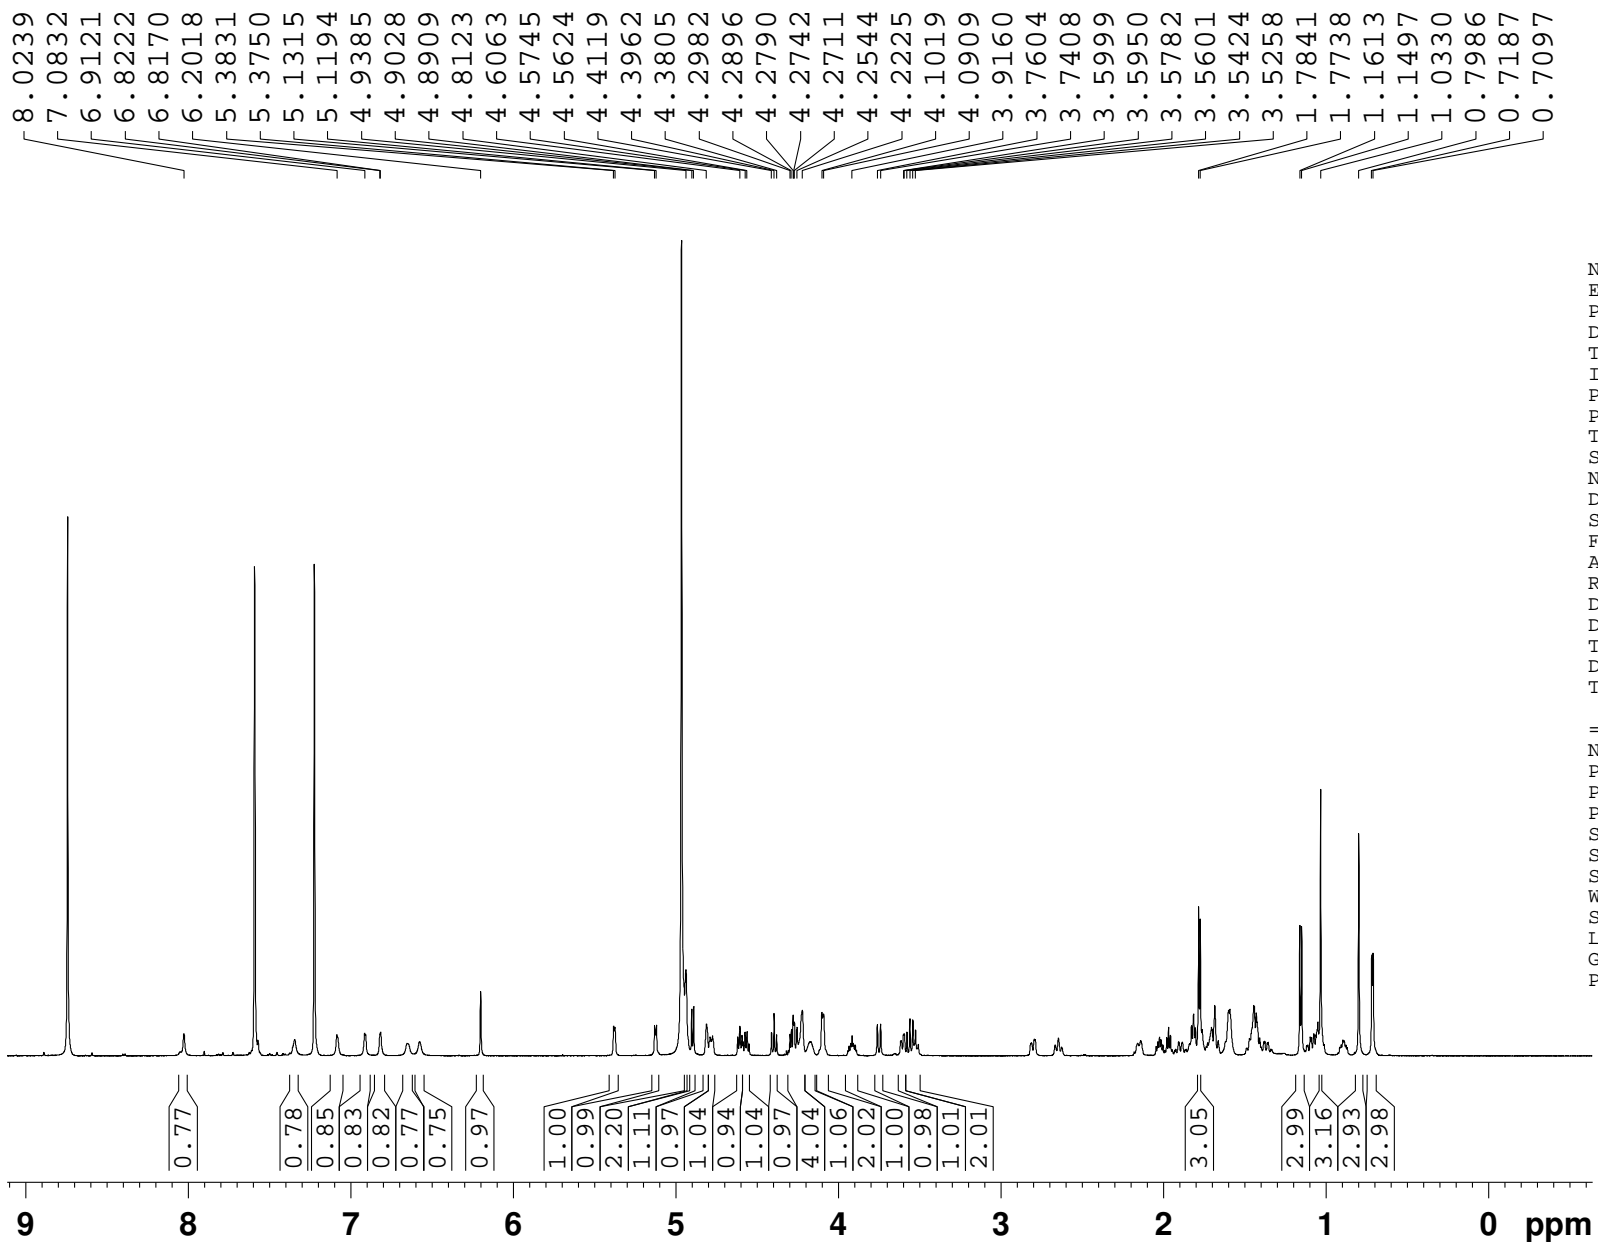

NAME ZP20110415C  
EXPNO 1  
PROCNO 1  
Date\_ 20110415  
Time 15.13  
INSTRUM spect  
PROBHD 5 mm PABBO BB-  
PULPROG zg30  
TD 65536  
SOLVENT Pyr  
NS 8  
DS 2  
SWH 12019.230 Hz  
FIDRES 0.183399 Hz  
AQ 2.7263892 sec  
RG 256  
DW 41.600 usec  
DE 6.50 usec  
TE 298.2 K  
D1 1.00000000 sec  
TD0 1

===== CHANNEL f1 =====  
NUC1 1H  
P1 11.10 usec  
PL1 -4.00 dB  
PL1W 34.70265579 W  
SF01 600.1324005 MHz  
SI 32768  
SF 600.1299729 MHz  
WDW EM  
SSB 0  
LB 0.30 Hz  
GB 0  
PC 1.00

AV-600-13C

Sample:

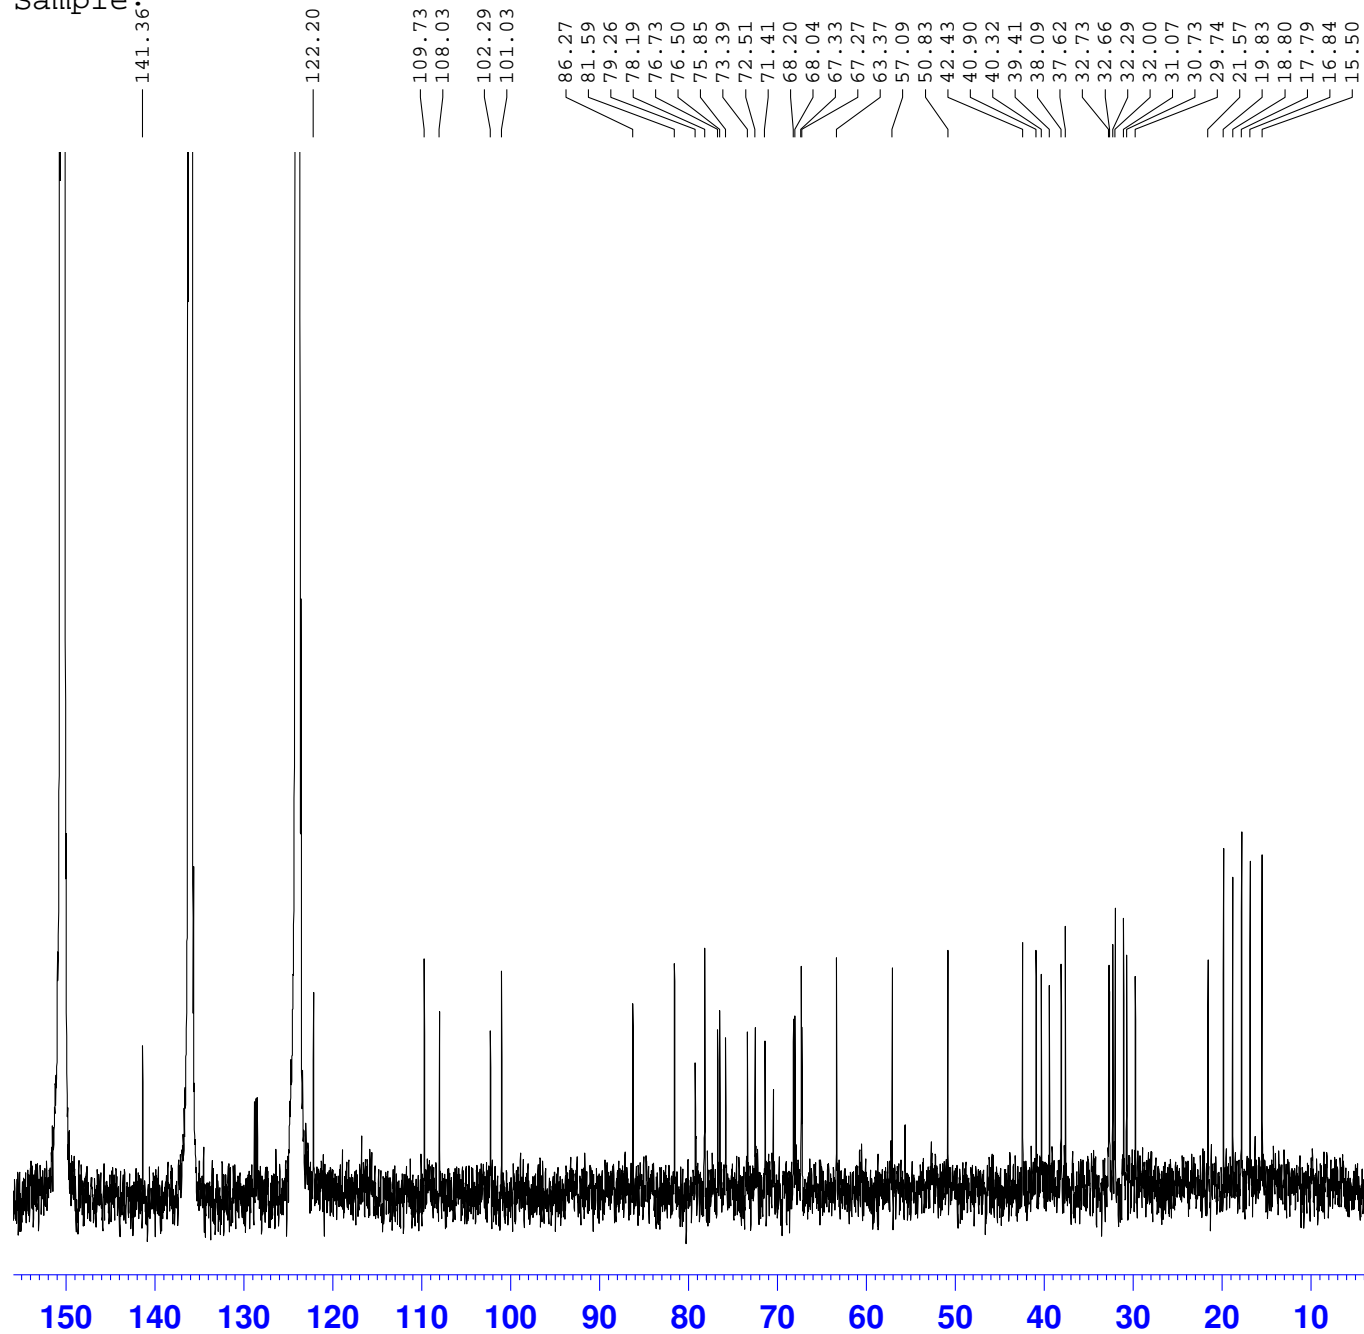

```

NAME          ZP20110415C
EXPNO         2
PROCNO        1
Date_         20110419
Time          14.47
INSTRUM       spect
PROBHD        5 mm PABBO BB-
PULPROG       zgpg30
TD            65536
SOLVENT       Pyr
NS            1435
DS            2
SWH           45454.547 Hz
FIDRES        0.693581 Hz
AQ            0.7209570 sec
RG            9200
DW            11.000 usec
DE            6.50 usec
TE            298.2 K
D1            2.00000000 sec
D11           0.03000000 sec
TD0           1

```

```

===== CHANNEL f1 =====
NUC1          13C
P1            8.80 usec
PL1           1.00 dB
PL1W         83.20243835 W
SFO1         150.9178993 MHz

```

```

===== CHANNEL f2 =====
CPDPRG2      waltz16
NUC2          1H
PCPD2        80.00 usec
PL2           -4.00 dB
PL12         13.16 dB
PL13         16.00 dB
PL2W         34.70265579 W
PL12W        0.66736388 W
PL13W        0.34702653 W
SFO2         600.1324005 MHz
SI            32768
SF           150.9028734 MHz
WDW           EM
SSB           0
LB            3.00 Hz
GB            0
PC            1.40

```

<sup>1</sup>H NMR of Compound 29

AV-600-1H

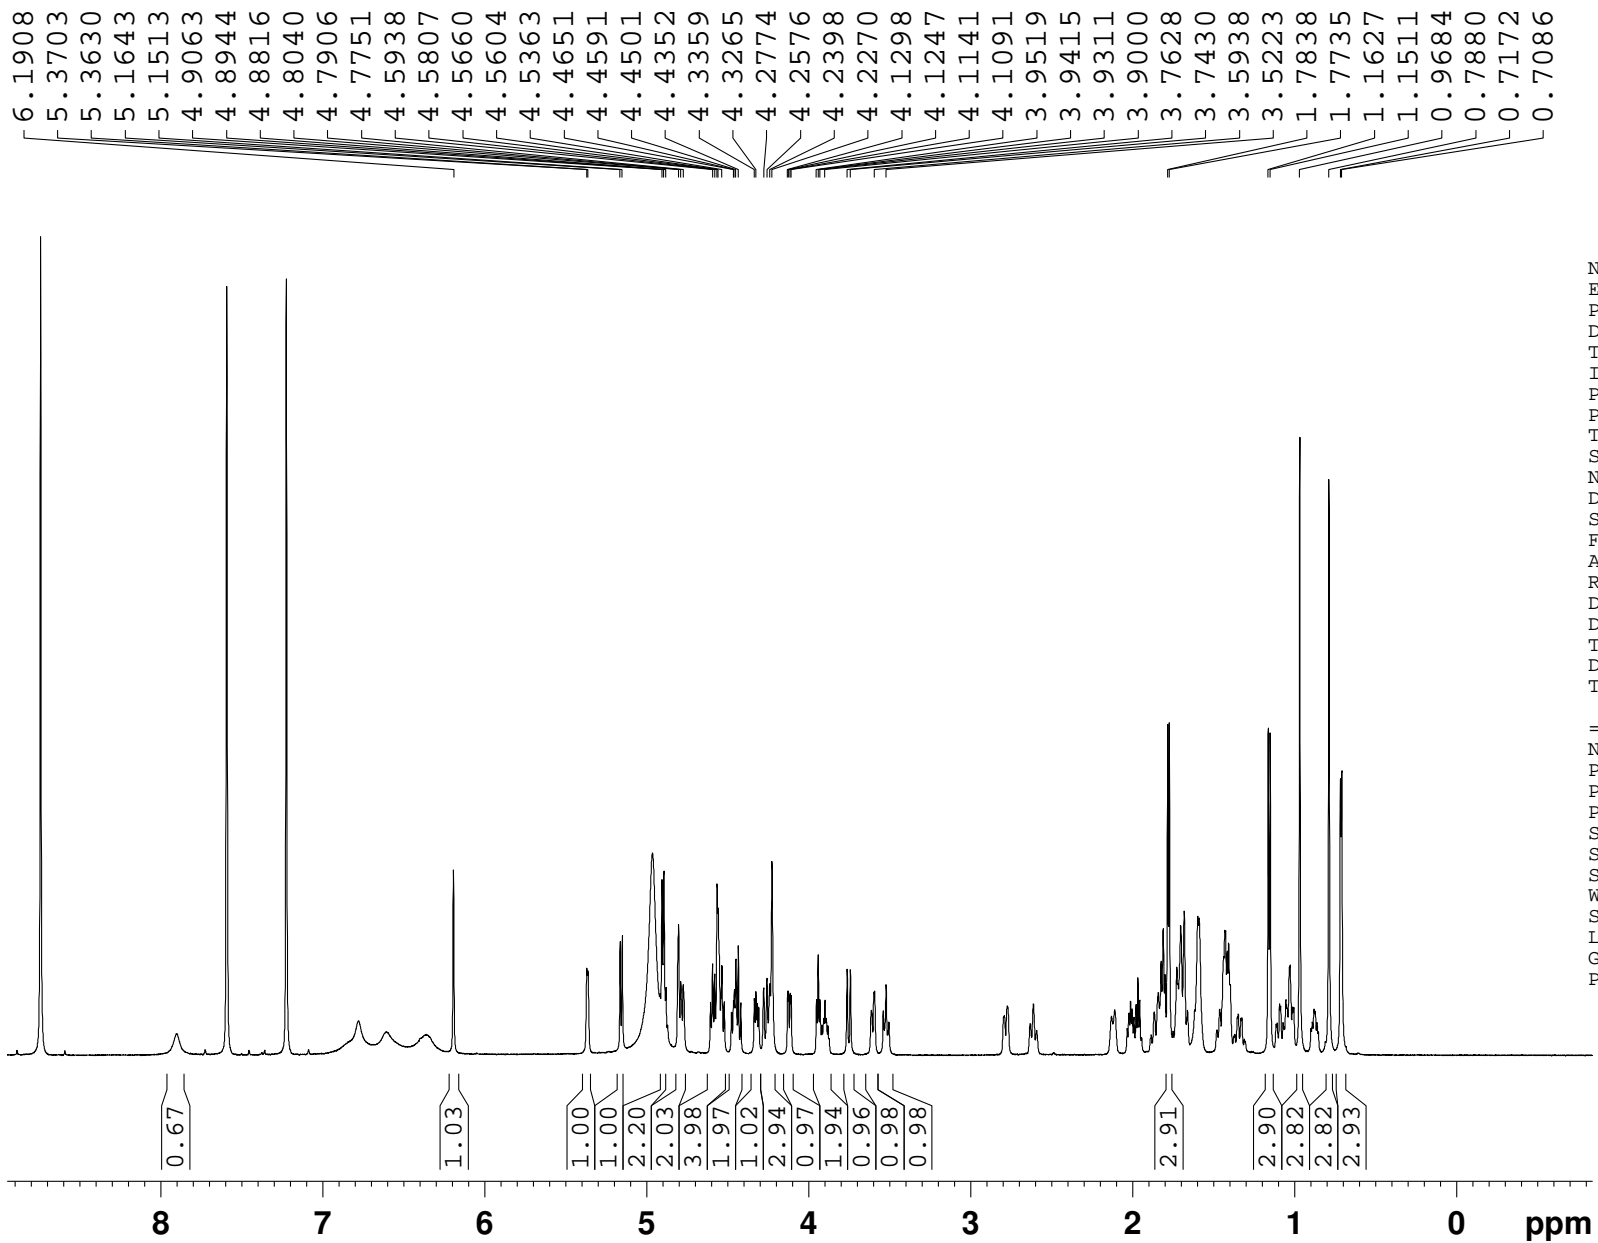

NAME ZP20110415E  
EXPNO 1  
PROCNO 1  
Date\_ 20110415  
Time 15.20  
INSTRUM spect  
PROBHD 5 mm PABBO BB-  
PULPROG zg30  
TD 65536  
SOLVENT Pyr  
NS 8  
DS 2  
SWH 12019.230 Hz  
FIDRES 0.183399 Hz  
AQ 2.7263892 sec  
RG 144  
DW 41.600 usec  
DE 6.50 usec  
TE 298.2 K  
D1 1.00000000 sec  
TD0 1

==== CHANNEL f1 =====  
NUC1 1H  
P1 11.10 usec  
PL1 -4.00 dB  
PL1W 34.70265579 W  
SF01 600.1324005 MHz  
SI 32768  
SF 600.1308781 MHz  
WDW EM  
SSB 0  
LB 0.30 Hz  
GB 0  
PC 1.00



<sup>13</sup>C NMR of Compound 29

AV-600-13C

Sample:

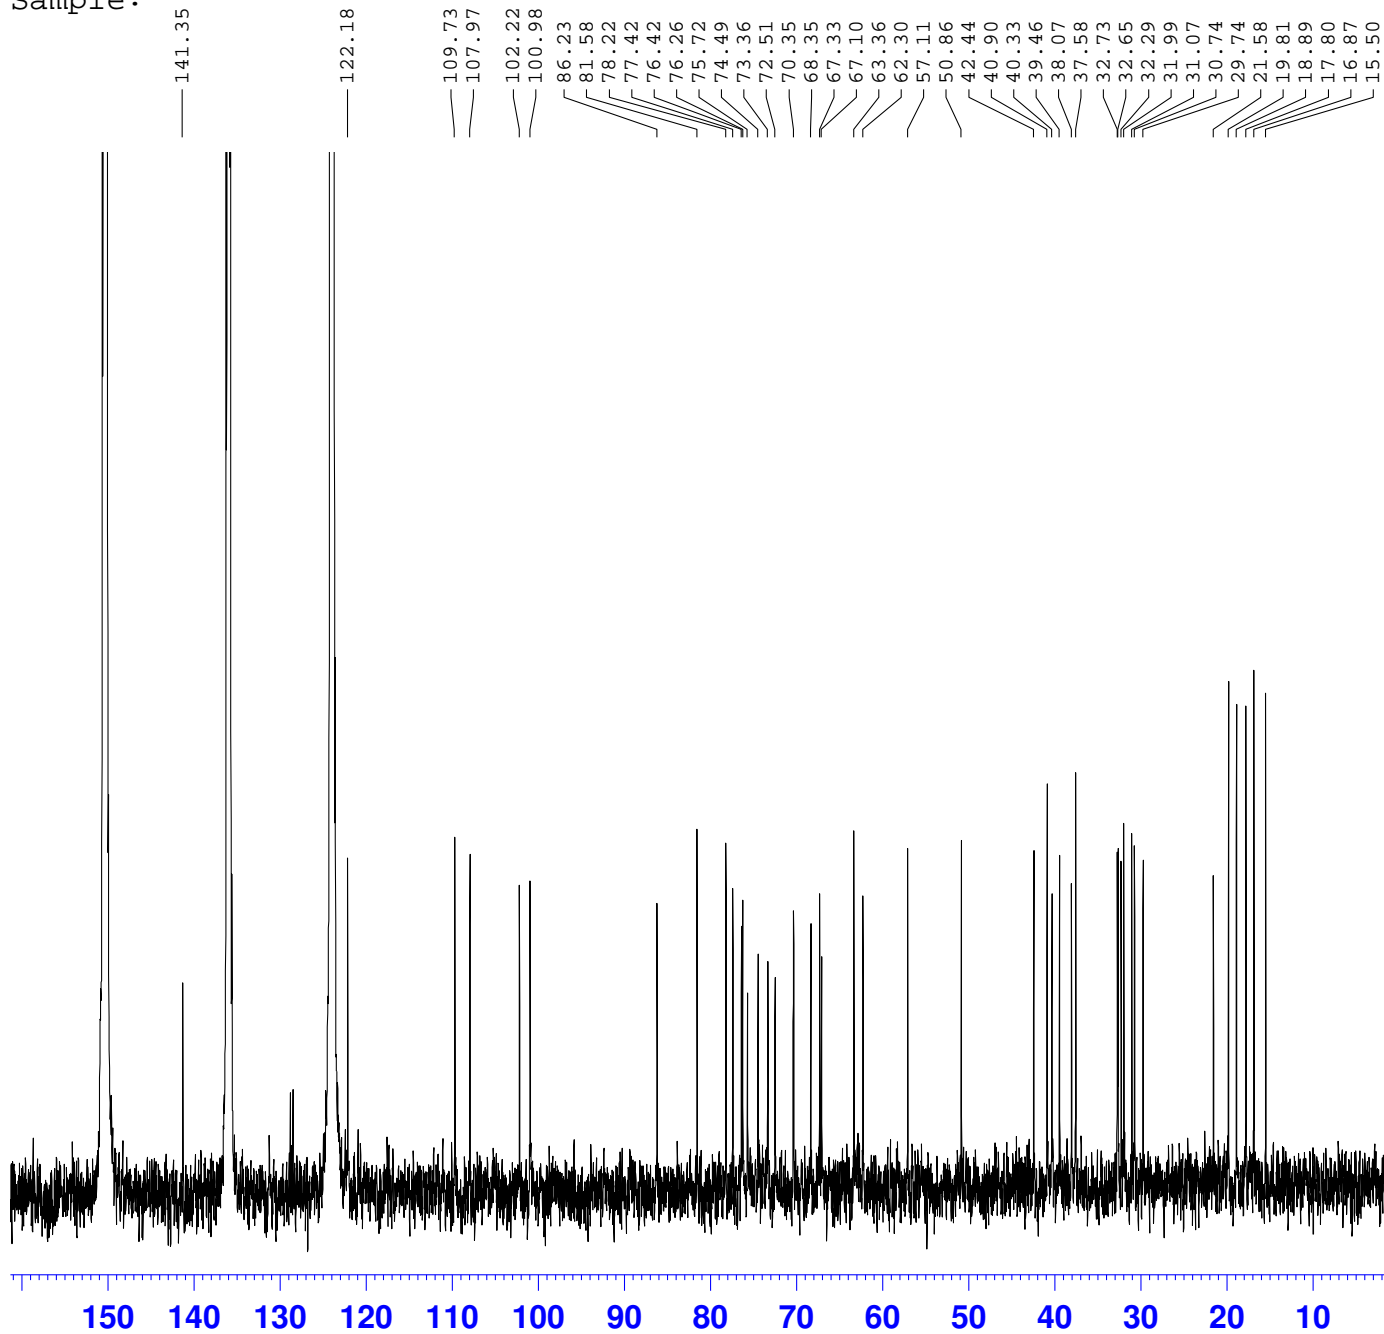

```
NAME          ZP20110415E
EXPNO         2
PROCNO        1
Date_         20110419
Time          16.16
INSTRUM       spect
PROBHD        5 mm PABBO BB-
PULPROG       zgpg30
TD            65536
SOLVENT       Pyr
NS            865
DS            2
SWH           45454.547 Hz
FIDRES        0.693581 Hz
AQ            0.7209570 sec
RG            9200
DW            11.000 usec
DE            6.50 usec
TE            298.2 K
D1            2.00000000 sec
D11           0.03000000 sec
TD0           1
```

```
===== CHANNEL f1 =====
NUC1          13C
P1            8.80 usec
PL1           1.00 dB
PL1W          83.20243835 W
SFO1          150.9178993 MHz
```

```
===== CHANNEL f2 =====
CPDPRG2       waltz16
NUC2          1H
PCPD2         80.00 usec
PL2           -4.00 dB
PL12          13.16 dB
PL13          16.00 dB
PL2W          34.70265579 W
PL12W         0.66736388 W
PL13W         0.34702653 W
SFO2          600.1324005 MHz
SI            32768
SF            150.9029280 MHz
WDW           EM
SSB           0
LB            3.00 Hz
GB            0
PC            1.40
```

AV-600-1H

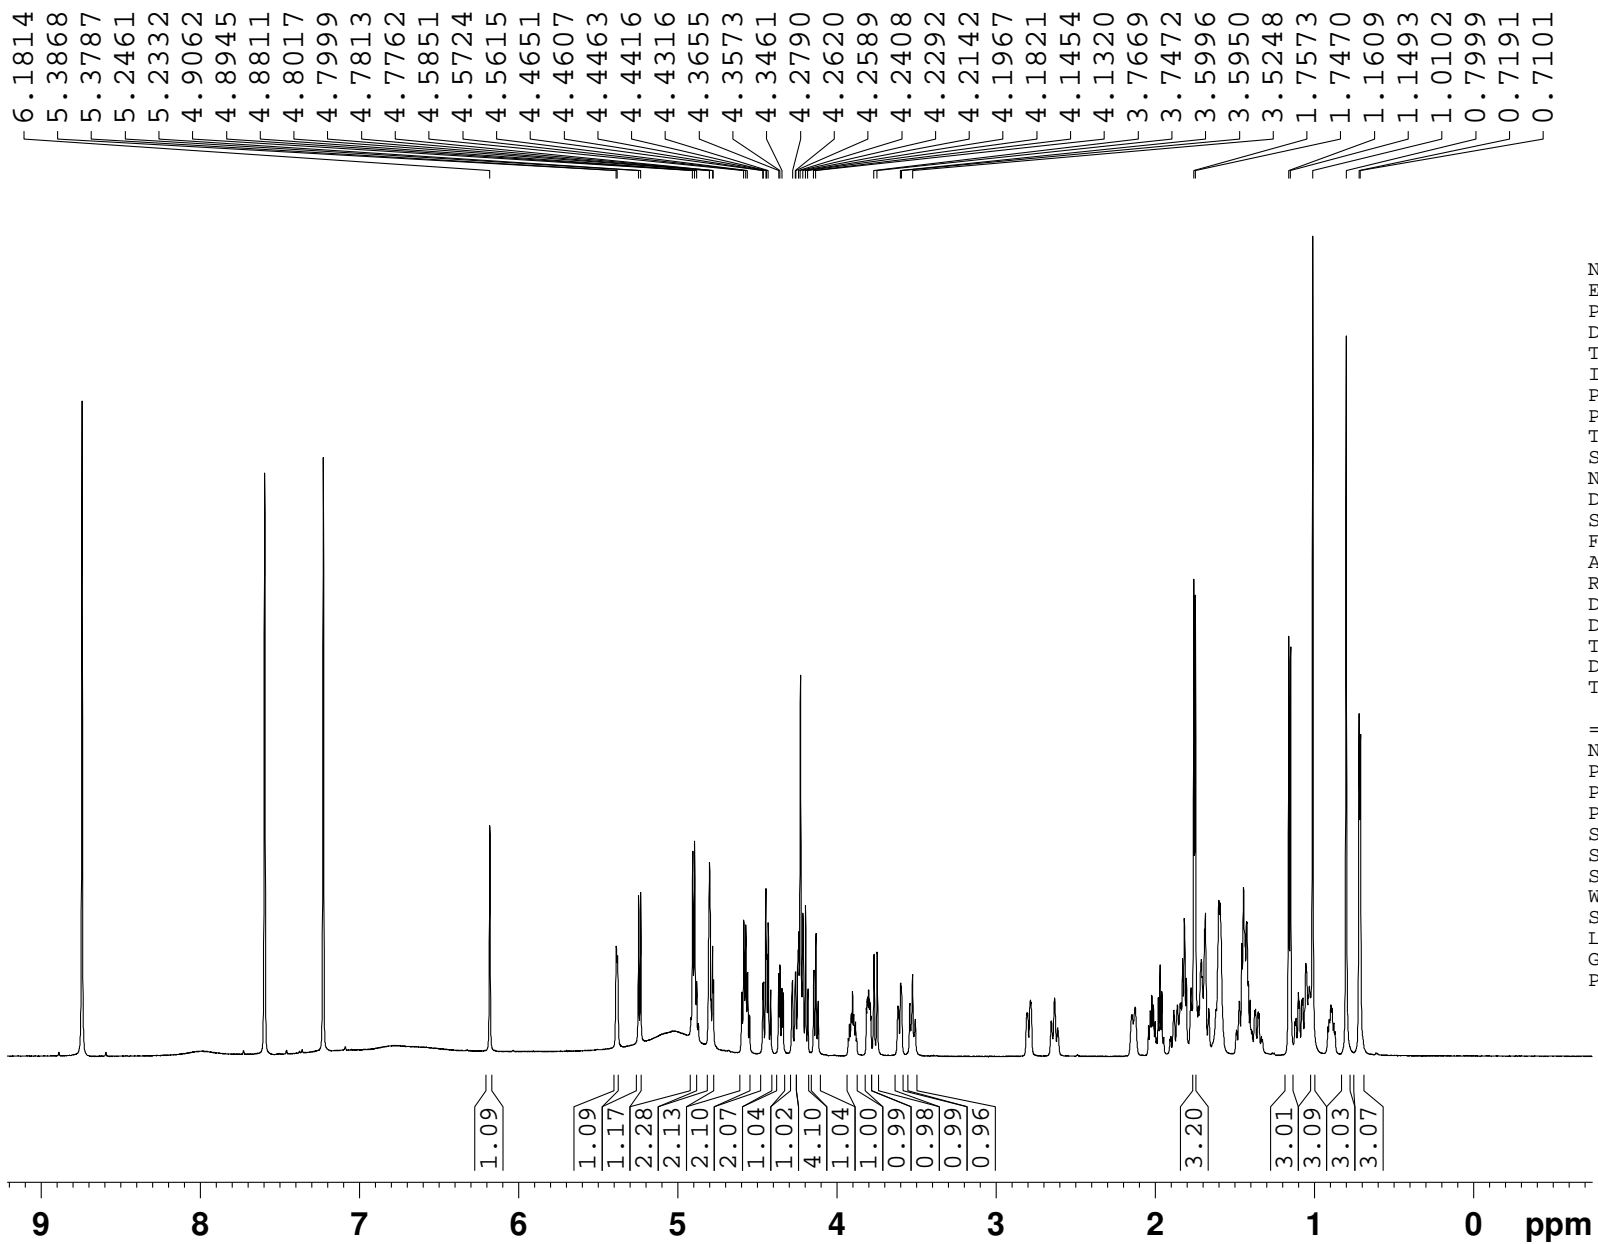

```

NAME      ZP20110415D
EXPNO     1
PROCNO    1
Date_     20110415
Time      15.16
INSTRUM   spect
PROBHD    5 mm PABBO BB-
PULPROG   zg30
TD         65536
SOLVENT   Pyr
NS         8
DS         2
SWH       12019.230 Hz
FIDRES    0.183399 Hz
AQ         2.7263892 sec
RG         144
DW         41.600 usec
DE         6.50 usec
TE         298.2 K
D1         1.00000000 sec
TD0        1
    
```

```

===== CHANNEL f1 =====
NUC1      1H
P1        11.10 usec
PL1       -4.00 dB
PL1W      34.70265579 W
SF01      600.1324005 MHz
SI        32768
SF        600.1306569 MHz
WDW       EM
SSB       0
LB        0.30 Hz
GB        0
PC        1.00
    
```

<sup>13</sup>C NMR of Compound 30

AV-600-13C

Sample:

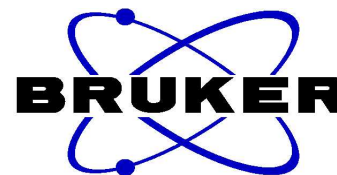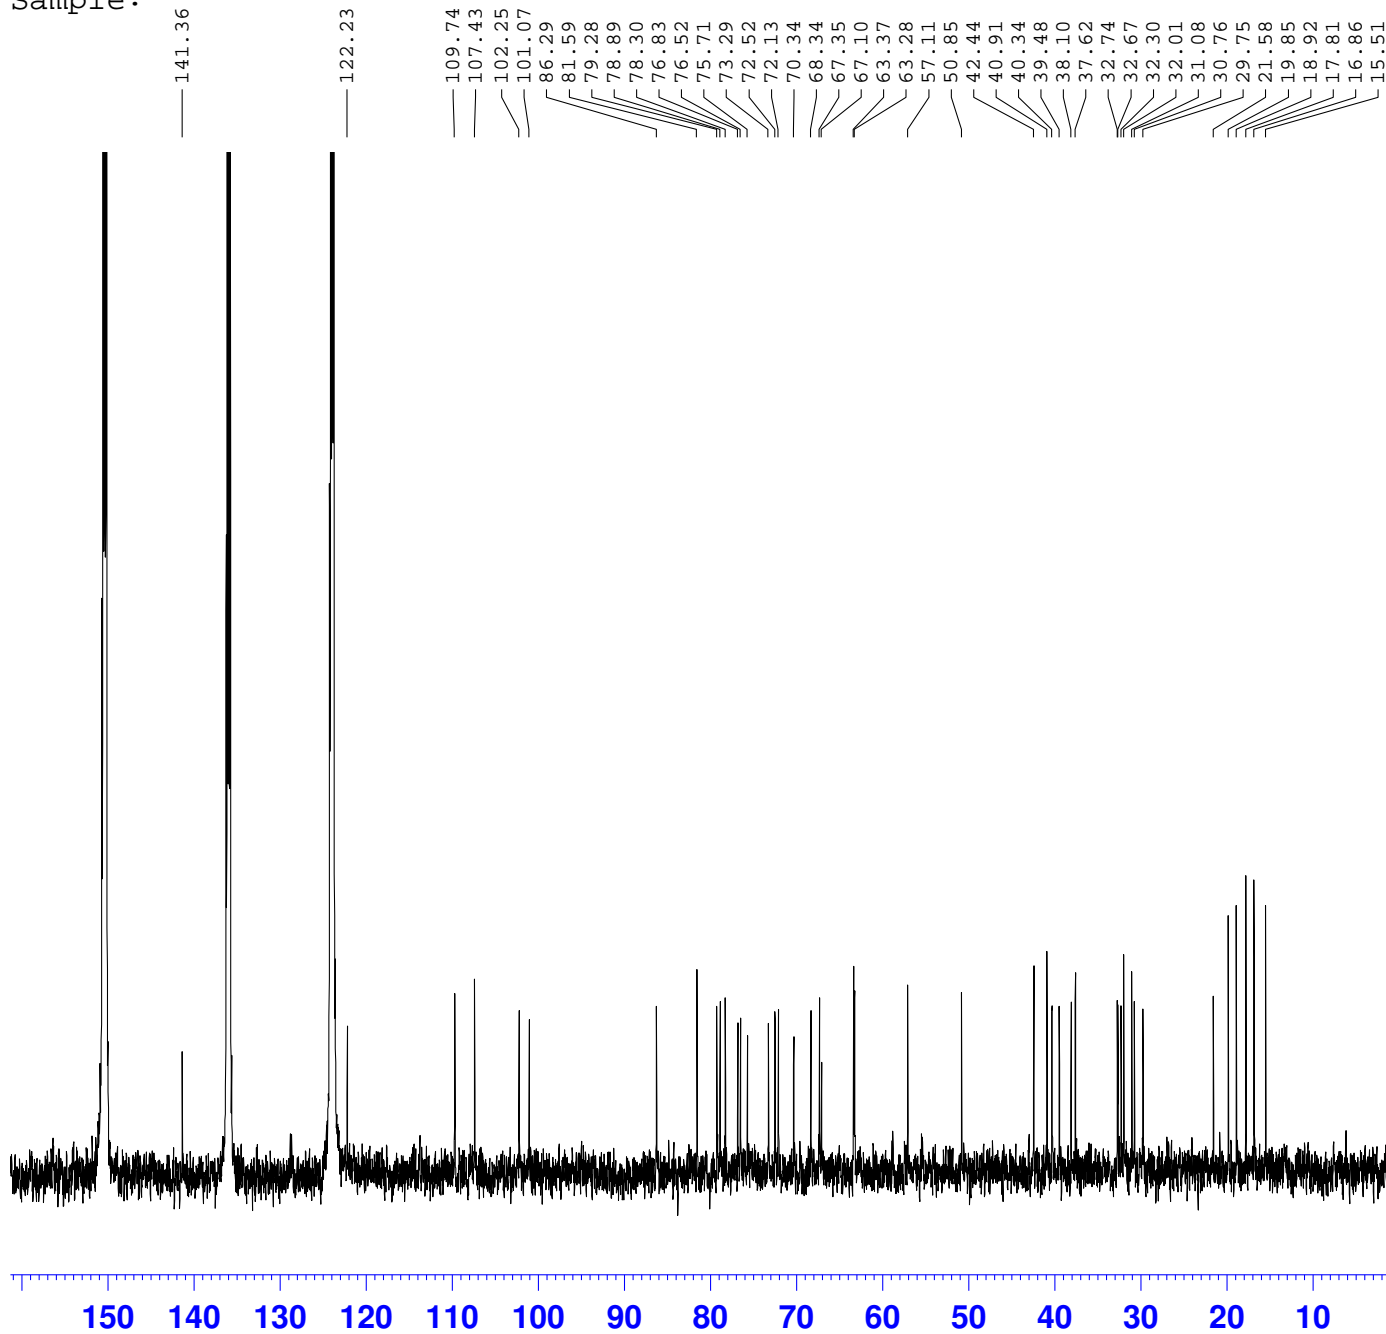

```
NAME          ZP20110415D
EXPNO          2
PROCNO         1
Date_          20110419
Time           9.05
INSTRUM        spect
PROBHD         5 mm PABBO BB-
PULPROG        zgpg30
TD             65536
SOLVENT        Pyr
NS             241
DS             2
SWH            45454.547 Hz
FIDRES         0.693581 Hz
AQ            0.7209570 sec
RG            9200
DW            11.000 usec
DE            6.50 usec
TE            298.2 K
D1            2.00000000 sec
D11           0.03000000 sec
TD0           1
```

```
===== CHANNEL f1 =====
NUC1           13C
P1             8.80 usec
PL1           1.00 dB
PL1W          83.20243835 W
SFO1          150.9178993 MHz
```

```
===== CHANNEL f2 =====
CPDPRG2       waltz16
NUC2           1H
PCPD2         80.00 usec
PL2           -4.00 dB
PL12          13.16 dB
PL13          16.00 dB
PL2W          34.70265579 W
PL12W         0.66736388 W
PL13W         0.34702653 W
SFO2          600.1324005 MHz
SI            32768
SF            150.9026995 MHz
WDW           EM
SSB           0
LB            3.00 Hz
GB            0
PC            1.40
```

1H NMR of Compound 31

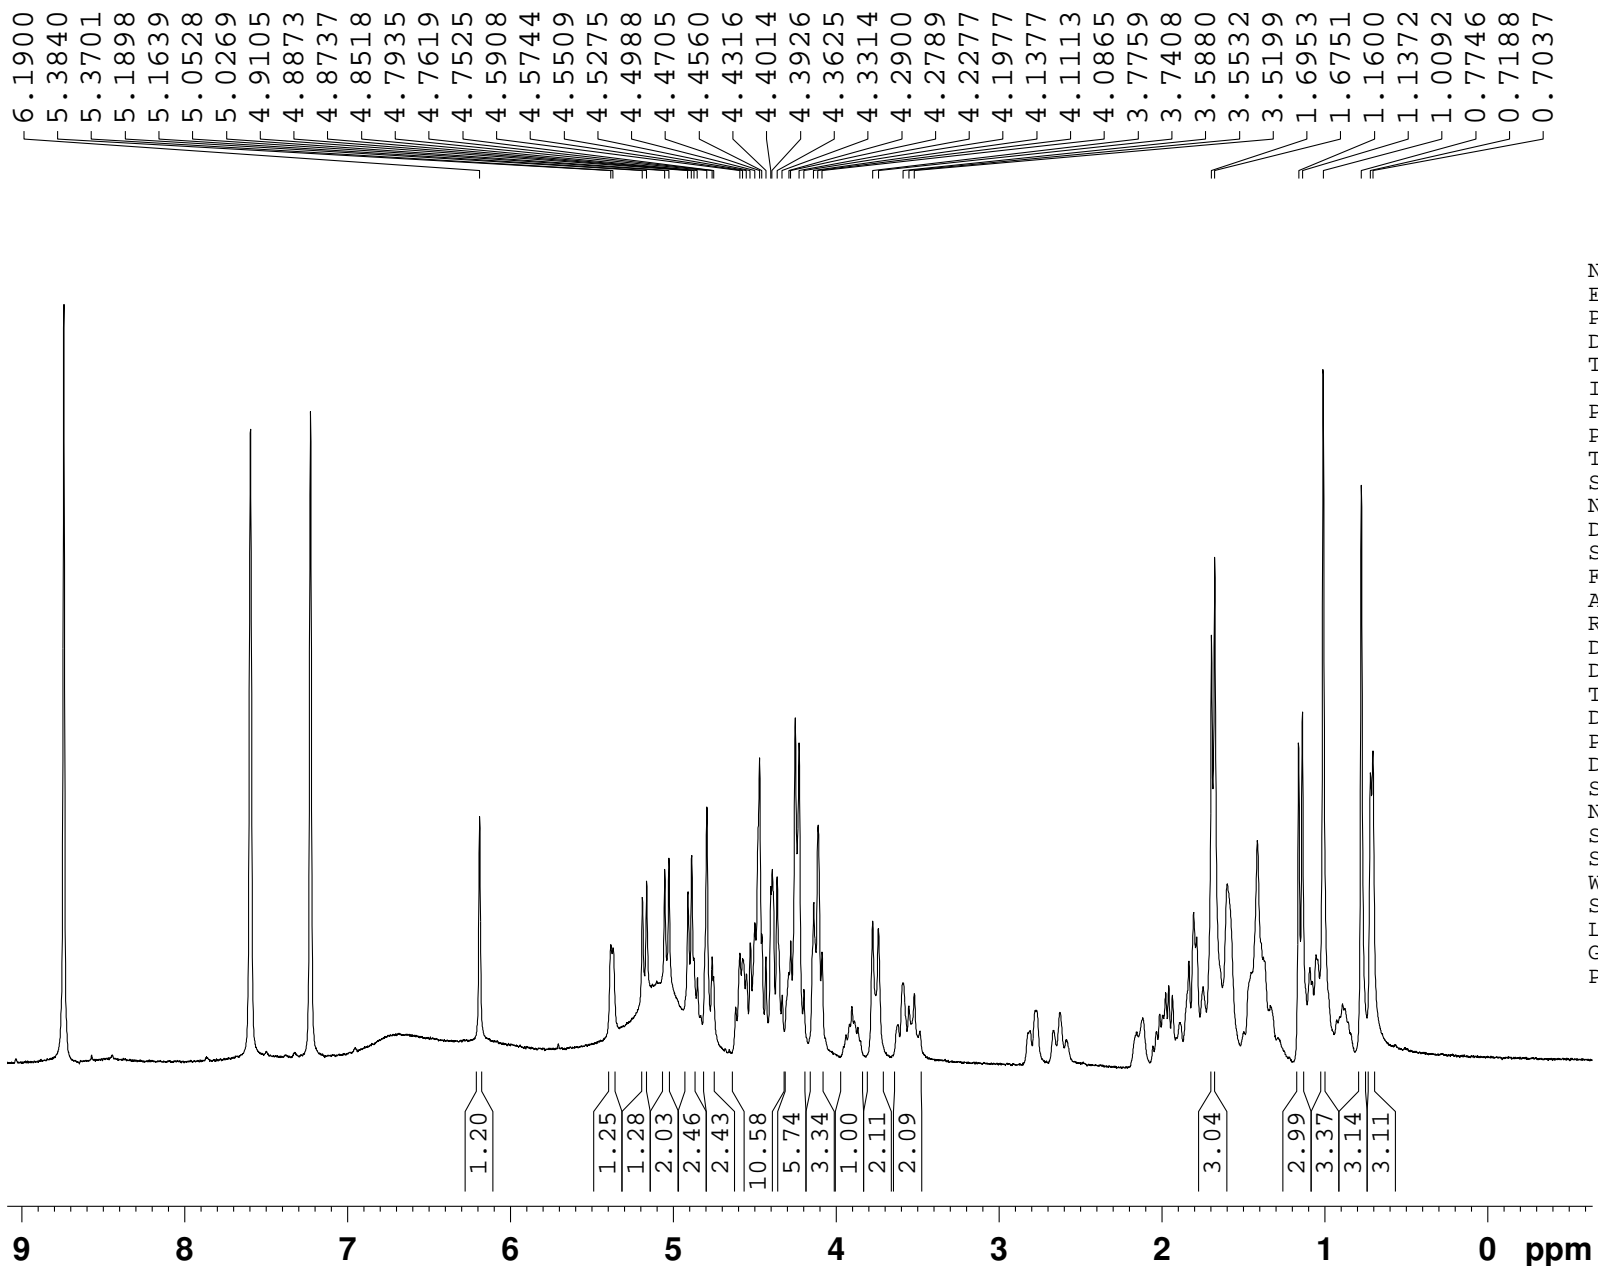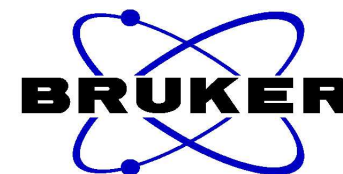

|         |                 |
|---------|-----------------|
| NAME    | ZP20110414B     |
| EXPNO   | 1               |
| PROCNO  | 1               |
| Date_   | 20110415        |
| Time    | 5.56            |
| INSTRUM | arx300          |
| PROBHD  | 5 mm QNP 1H     |
| PULPROG | zg30            |
| TD      | 32768           |
| SOLVENT | Pyr             |
| NS      | 16              |
| DS      | 2               |
| SWH     | 6024.096 Hz     |
| FIDRES  | 0.183841 Hz     |
| AQ      | 2.7197940 sec   |
| RG      | 1024            |
| DW      | 83.000 usec     |
| DE      | 118.57 usec     |
| TE      | 300.0 K         |
| D1      | 1.00000000 sec  |
| P1      | 12.40 usec      |
| DE      | 118.57 usec     |
| SFO1    | 300.1318534 MHz |
| NUCLEUS | 1H              |
| SI      | 16384           |
| SF      | 300.1303291 MHz |
| WDW     | EM              |
| SSB     | 0               |
| LB      | 0.30 Hz         |
| GB      | 0               |
| PC      | 1.00            |

<sup>13</sup>C NMR of Compound 31

AV-600-13C

Sample:

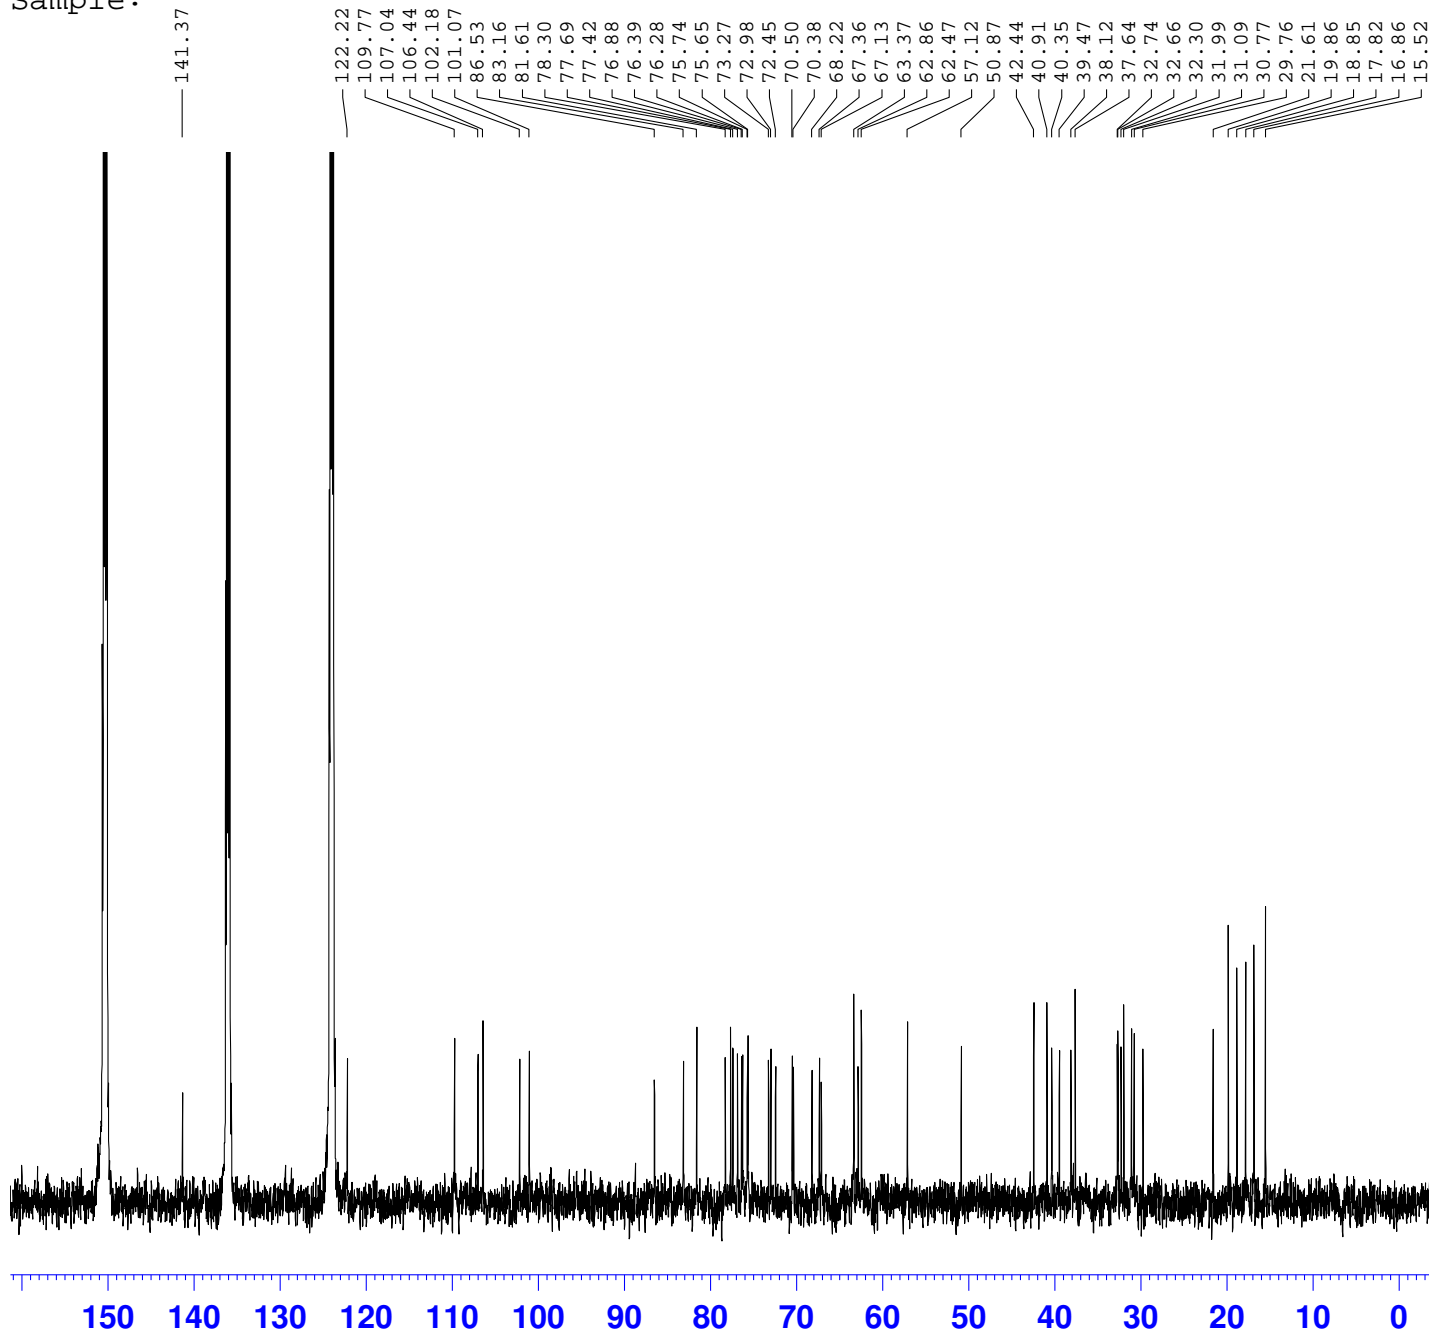

```
NAME          ZP20110414B
EXPNO         2
PROCNO        1
Date_         20110429
Time          13.43
INSTRUM       spect
PROBHD        5 mm PABBO BB-
PULPROG       zgpg30
TD            65536
SOLVENT       Pyr
NS            256
DS            2
SWH           45454.547 Hz
FIDRES        0.693581 Hz
AQ            0.7209570 sec
RG            9200
DW            11.000 usec
DE            6.50 usec
TE            298.2 K
D1            2.00000000 sec
D11           0.03000000 sec
TD0           1
```

```
===== CHANNEL f1 =====
NUC1           13C
P1             8.80 usec
PL1            1.00 dB
PL1W           83.20243835 W
SFO1           150.9178993 MHz
```

```
===== CHANNEL f2 =====
CPDPRG2       waltz16
NUC2           1H
PCPD2         80.00 usec
PL2           -4.00 dB
PL12          13.16 dB
PL13          16.00 dB
PL2W          34.70265579 W
PL12W         0.66736388 W
PL13W         0.34702653 W
SFO2           600.1324005 MHz
SI            32768
SF            150.9026977 MHz
WDW           EM
SSB           0
LB            3.00 Hz
GB            0
PC            1.40
```
